# Supplementary material
Source: PubMed Central journal article supplement (PMC8898741)
Supplement: mmc1.pdf [file mmc1.pdf]

**Cell Reports, Volume 38**

**Supplemental information**

**Rationally designed immunogens**

**enable immune focusing**

**following SARS-CoV-2 spike imprinting**

**Blake M. Hauser, Maya Sangesland, Kerri J. St. Denis, Evan C. Lam, James Brett Case, Ian W. Windsor, Jared Feldman, Timothy M. Caradonna, Ty Kannegieter, Michael S. Diamond, Alejandro B. Balazs, Daniel Lingwood, and Aaron G. Schmidt**

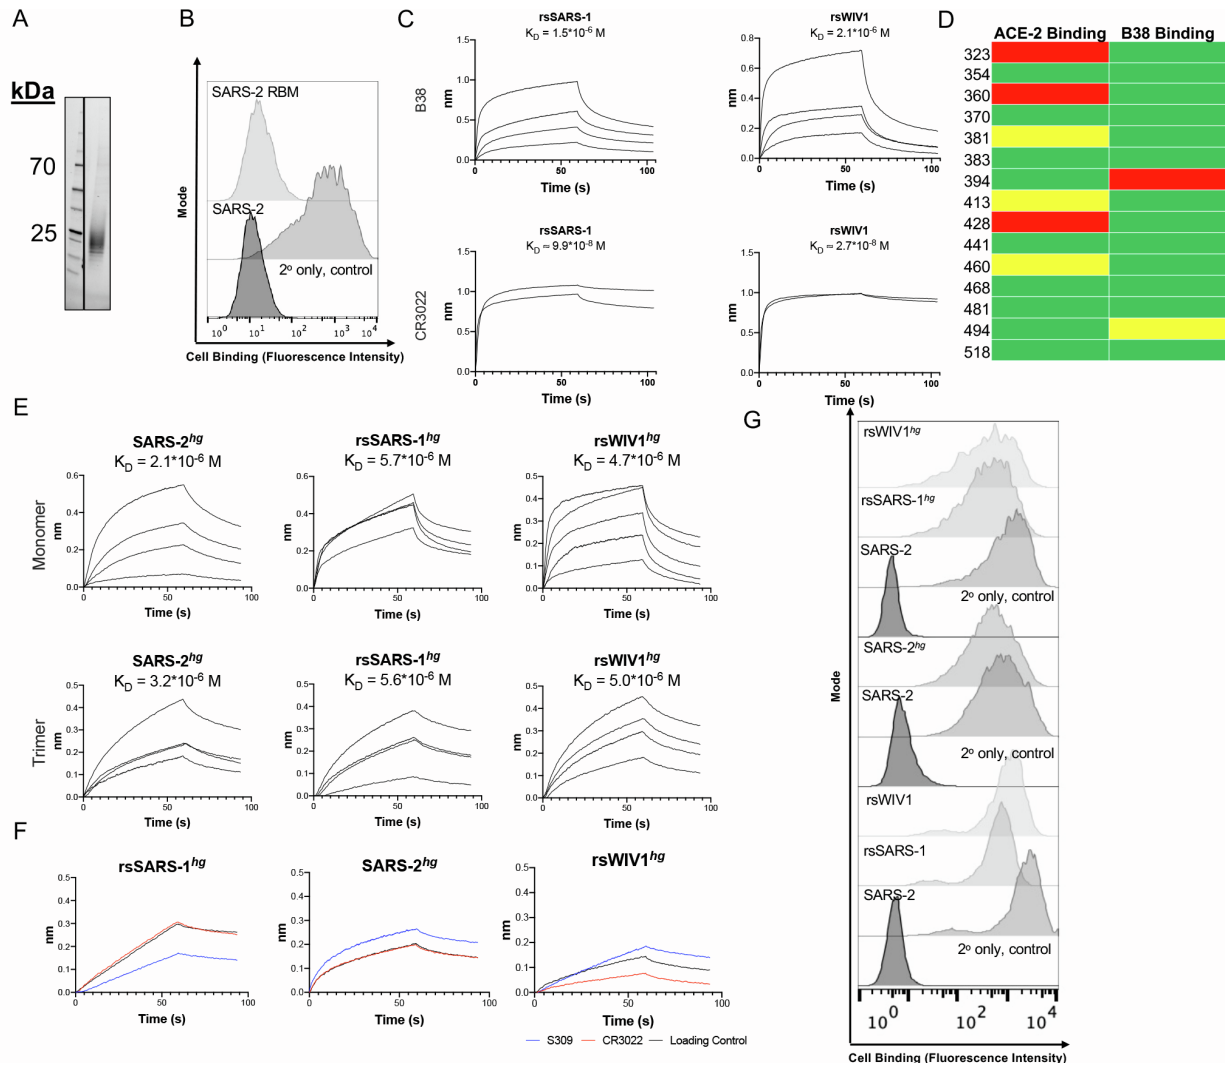

**Figure S1 (related to Fig. 1). Biochemical validation of resurfaced and hyperglycosylated immunogens.** (A) SDS-Page gel analysis of the SARS-2 receptor binding motif (RBM) construct with HRV 3C-cleavable 8xHis and streptavidin binding peptide (SBP) tags. Gel lanes containing unrelated samples have been removed. (B) ACE2 cell binding assay results for the SARS-2 RBM construct at 1  $\mu$ M. (C) After grafting the SARS-2 RBM onto the SARS-1 and WIV1 RBDs, conformationally specific Fabs B38 and CR3022 were used to confirm that these epitopes remained intact with comparable affinity to wild-type ( $9.7 \times 10^{-7}$  M for B38 Fab and SARS-2 RBD;  $2.7 \times 10^{-8}$  M for CR3022 Fab and SARS-1 RBD;  $3.7 \times 10^{-8}$  M for CR3022 Fab and WIV1 RBD). FAB2G sensors were used with immobilized fabs. rsSARS-1 and rsWIV1 were the analytes. Titrations with B38 Fab were performed at 10  $\mu$ M, 5  $\mu$ M, 1  $\mu$ M, and 0.5  $\mu$ M. Titrations with CR3022 Fab were performed at 10  $\mu$ M and 5  $\mu$ M. Vendor-supplied software was used to generate an apparent  $K_D$ , or an approximate  $K_D$  in the case of titrations with two runs. (D) Candidate glycans were tested individually in the context of the SARS-CoV-2 RBD. All glycans were designed to mask epitopes outside the RBM. Therefore, biochemical validation was performed by assessing binding to the RBM-directed conformationally specific antibody B38 via single-hit BLI using FAB2G sensors with the RBD of interest as the analyte at 10  $\mu$ M. Binding to ACE2 was also

assessed via an ACE2 cell binding assay with antigen concentrations at 1  $\mu\text{M}$ . Binding was binned subjectively into three categories: minimal (red), substantially reduced (yellow), and roughly intact (green). **(E)** Conformationally specific Fab B38 was used to assess continued accessibility of the SARS-2 RBM in both monomeric and trimeric hyperglycosylated constructs. FAB2G sensors were used with immobilized fabs; hyperglycosylated coronavirus proteins were the analytes. Titrations with B38 Fab were performed at 7.5  $\mu\text{M}$ , 5  $\mu\text{M}$ , 2.5  $\mu\text{M}$ , and 1  $\mu\text{M}$  (rsSARS-1<sup>hg</sup> trimer, rsWIV1<sup>hg</sup> trimer); 5  $\mu\text{M}$ , 2.5  $\mu\text{M}$ , 1  $\mu\text{M}$ , and 0.5  $\mu\text{M}$  (SARS-2<sup>hg</sup> trimer, SARS-2<sup>hg</sup> monomer); 10  $\mu\text{M}$ , 7.5  $\mu\text{M}$ , 5  $\mu\text{M}$ , 3.75  $\mu\text{M}$ , and 2.5  $\mu\text{M}$  (rsWIV1<sup>hg</sup> monomer); 10  $\mu\text{M}$ , 7.5  $\mu\text{M}$ , 5  $\mu\text{M}$ , and 2.5  $\mu\text{M}$  (rsSARS-1<sup>hg</sup> monomer). Vendor-supplied software was used to generate an apparent  $K_D$ . **(F)** BLI with conformationally specific Fabs CR3022 and S309 at 10  $\mu\text{M}$  was compared to loading controls for each of the hyperglycosylated monomers. The similarity in these traces to the no-antibody loading control confirms a lack of binding. **(G)** ACE2 cell binding assay results for resurfaced and hyperglycosylated constructs at 1  $\mu\text{M}$ .

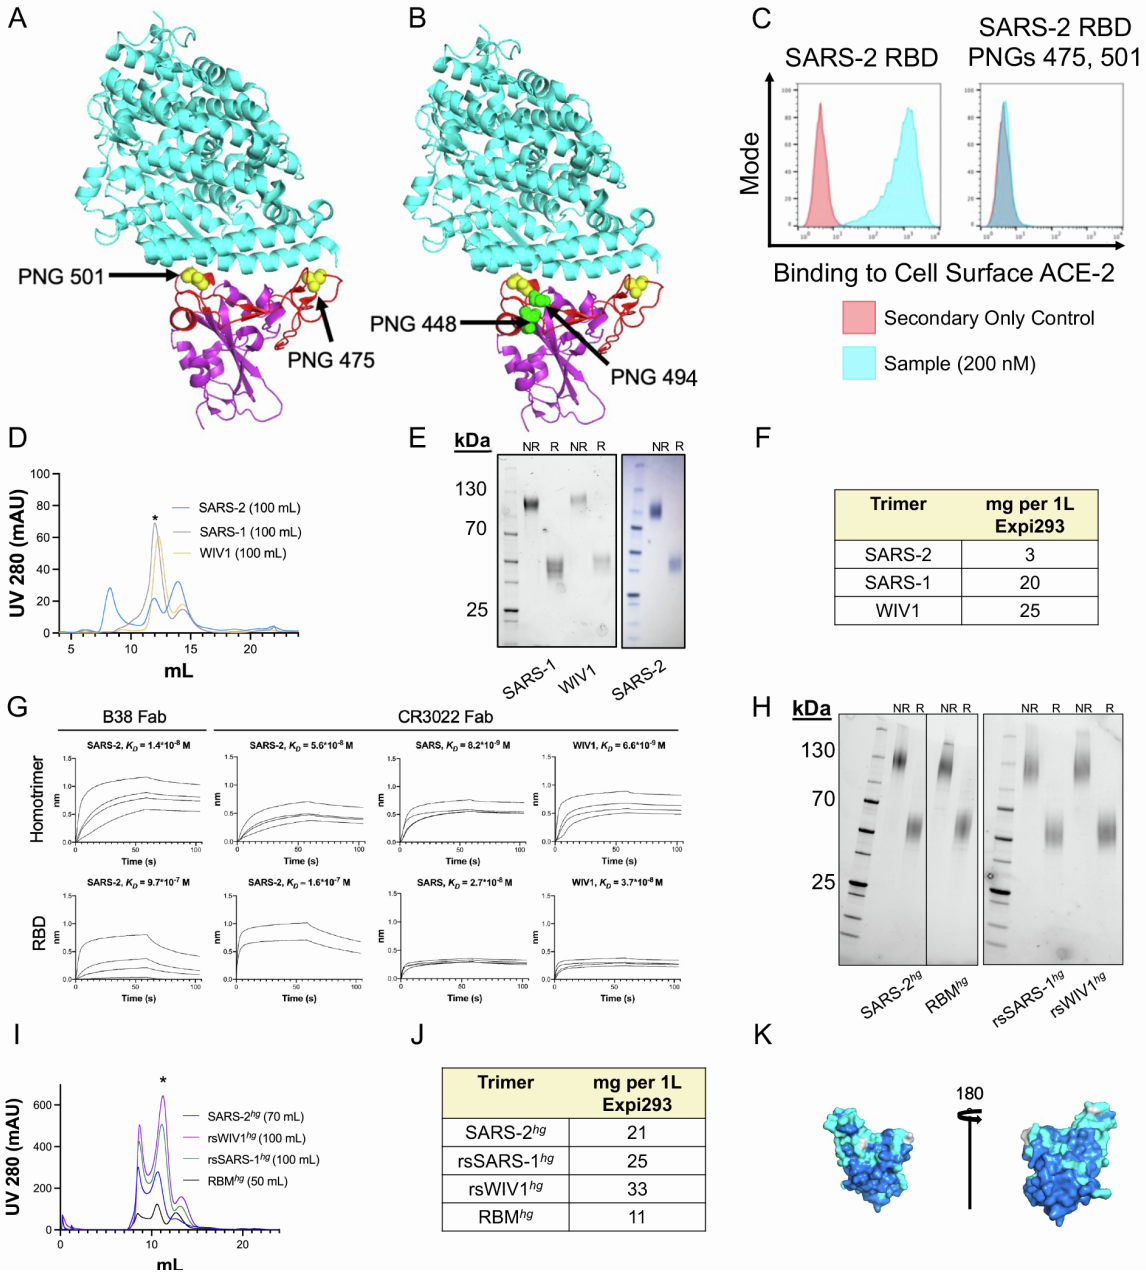

**Figure S2 (related to Fig. 1). Immunogen production and biochemical validation.** (A, B) Design and expression of two different versions of the SARS-2 RBD with additional putative N-linked glycosylation sites (PNGs) engineered onto the RBM. One construct has glycosylation sites at positions 475 and 501, while the other construct has glycosylation sites at positions 475, 501, 448, and 494. The latter is the RBM<sup>hg</sup> construct. ACE2 is shown in cyan, the RBM is shown in red, and the non-RBM portion of the SARS-2 RBD is shown in purple. (PDB: 6M0J) (C) The presence of glycans at positions 475 and 501 alone is sufficient to abrogate ACE2 binding to the RBM. (D) Representative size exclusion trace with (\*) marking the trimeric constructs. Fractions in this peak were pooled and used for immunizations. Quantity of Expi293 transfection is in parentheses next to each label. (E) SDS-PAGE analysis of purified trimers following removal of the affinity purification tags under non-reducing (NR) and reducing (R) conditions. The engineered disulfide bond at the C-terminus of the hyperglycosylated GCN4 tag separated under reducing

conditions. Panel includes monomeric RBDs run under reducing conditions for comparison. Gel lanes containing unrelated samples have been removed. **(F)** Protein yields for purified trimeric constructs in Expi293 cells. **(G)** Conformationally specific Fabs CR3022 and/or B38 were used to verify that trimer affinity was comparable (or greater than, due to increased avidity) wild-type RBD affinity. Fabs were immobilized to FAB2G sensors, and coronavirus proteins were the analytes. Trimers were titrated at 1  $\mu$ M, 750 nM, 500 nM, and 250 nM. Monomeric SARS-1 and WIV1 RBDs were titrated at 10  $\mu$ M, 5  $\mu$ M, 2.5  $\mu$ M, and 1  $\mu$ M. Monomeric SARS-2 RBD was titrated at 10  $\mu$ M, 1  $\mu$ M, 500 nM, and 100 nM with B38 Fab and at 10  $\mu$ M, 5  $\mu$ M, 750 nM, and 250 nM with CR3022 Fab. Apparent  $K_D$  was obtained by vendor-supplied software. **(H)** SDS-Page gel analysis of purified and cleaved trimeric constructs under non-reducing (NR) and reducing (R) conditions, showing the dissociation of the disulfide bond in the hyperglycosylated GCN4 tag (hgGCN4<sup>cys</sup>) under reducing conditions. Gel lanes containing unrelated samples have been removed. **(I)** Representative size exclusion chromatography traces for trimeric constructs. The trimer peak is marked with “\*”, and fractions from this peak were pooled for HRV 3C cleavage and use as immunogens. Quantity of Expi293 transfection is in parentheses next to each label. **(J)** Protein yields for purified trimeric hyperglycosylated constructs in Expi293 cells. **(K)** Strict amino acid conservation across the SARS-2 RBD (Genbank MN975262.1), SARS-1 RBD (Genbank ABD72970.1), and WIV1 RBD (Genbank AGZ48828.1) is depicted using dark blue on the structure for matches between all three genes, light blue for matches between two genes, and silver for positions where all genes differ (PDB: 6M0J).



GCN4 protein, a purification size exclusion trace (fractions in the peak marked with “\*” were pooled) and an SDS-PAGE gel run under non-reducing (NR) and reducing (R) conditions are shown. Gel lanes containing unrelated samples have been removed. **(G)** Serum ELISAs were performed against the relevant hyperglycosylated immunogens for the Trimer<sup>hg</sup> and Cocktail<sup>hg</sup> cohorts. There was no statistically significant difference in endpoint titers within the Trimer<sup>hg</sup> or Cocktail<sup>hg</sup> cohorts across these coating antigens, as determined by the Mann-Whitney U test and the Kruskal-Wallis test, respectively. Bars represent mean  $\pm$  SEM. **(H)** For all cohorts, day 35 serum samples were used in ELISAs to assess binding to RaTG13 and SHC014 RBDs. Bars represent mean  $\pm$  SEM. No statistical comparisons were performed.

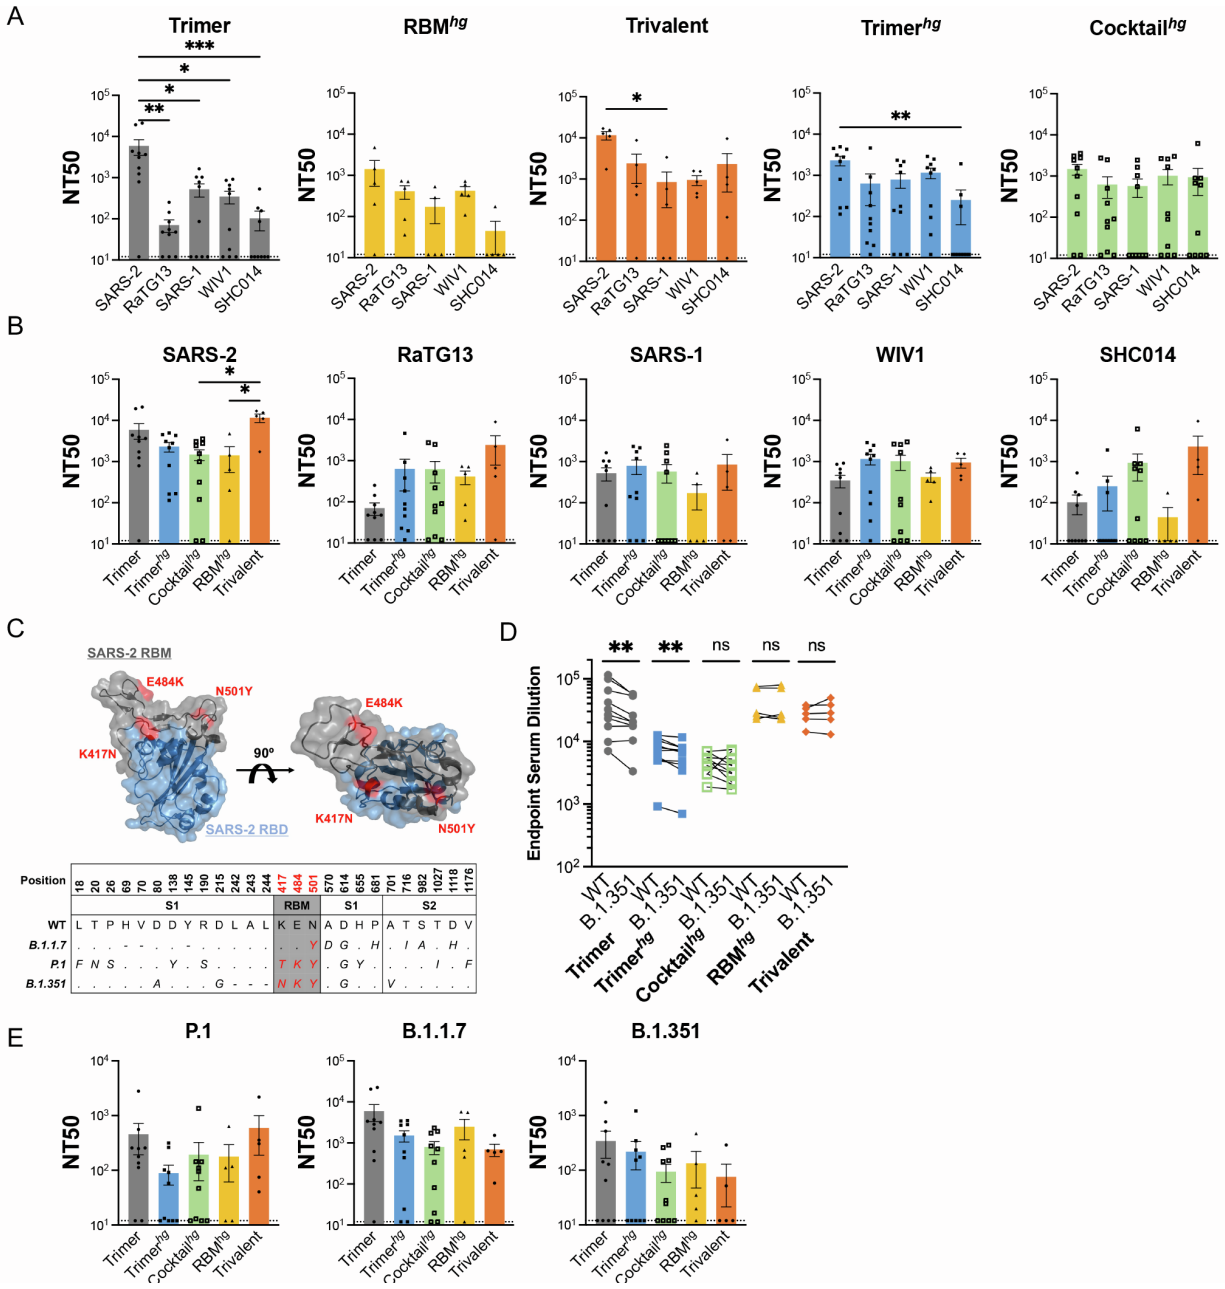

**Figure S4** (related to **Fig. 3**). **Neutralization against related sarbecoviruses and SARS-2 variants of concern.** (A) Day 35 serum from all mice was assayed for neutralization against SARS-2, RaTG13, SARS-1, WIV1, and SHC014 pseudoviruses. Statistical significance was determined using the Kruskal-Wallis test with post-hoc analysis using Dunn's test corrected for multiple comparisons, and pairwise comparisons without pictured bars were not significant (\* =  $p < 0.05$ , \*\* =  $p < 0.01$ , \*\*\* =  $p < 0.001$ ). Bars represent mean  $\pm$  SEM. (B) Pseudovirus neutralization assays were used to calculate NT50 values for SARS-2, SARS-1, WIV1, RaTG13, and SHC014 from all cohorts. All NT50s are from day 35 sera. Statistical significance was determined using the Kruskal-Wallis test with post-hoc analysis using Dunn's test corrected for multiple



comparisons in the case of a significant Kruskal-Wallis test, and pairwise comparisons without pictured bars were not significant (\* =  $p < 0.05$ ). Bars represent mean  $\pm$  SEM. **(C)** Structural depiction of SARS-2 variant RBD mutations for B.1.351 (red), as well as ACE2 contact residues (cyan). (PDB: 6M0J) Sequences depict all spike mutations across select variants. **(D)** Day 35 serum was assayed in ELISA against SARS-2 RBD (WT) and SARS-2 RBD with K417N, E484K, and N501Y mutations (B.1.351). Statistical significance was determined using the Wilcoxon sign rank test (\* =  $p < 0.05$ , \*\* =  $p < 0.01$ ; ns = not significant). **(E)** Pseudovirus neutralization assays were used to calculate NT50 values for P.1, B.1.1.7, and B.1.351 from all cohorts. All NT50s are from day 35 sera. Statistical significance was determined using the Kruskal-Wallis test; no pairwise differences are statistically significant. Bars represent mean  $\pm$  SEM.

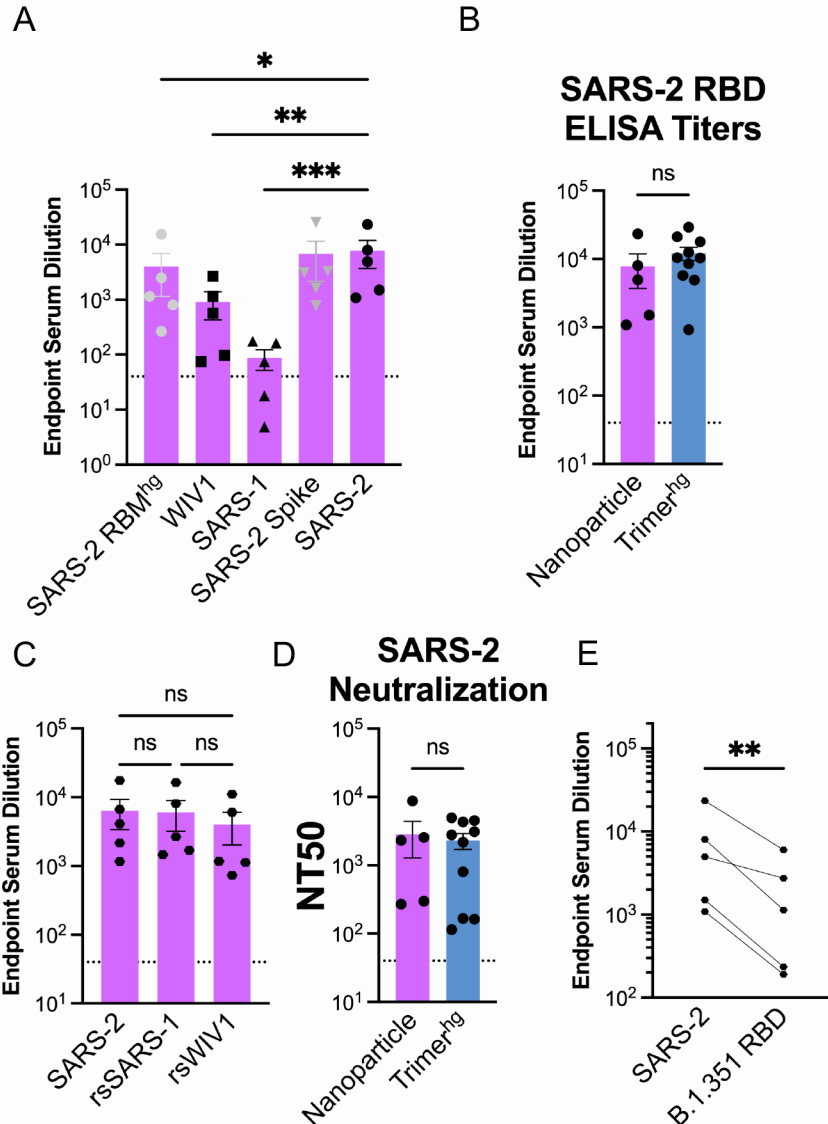

**Figure S5** (related to **Fig. 4**). **Serum antigenicity for the Nanoparticle cohort.** **(A)** Serum following immunization was assayed in ELISA at day 35 with different coronavirus antigens. Statistical significance was determined using the Kruskal-Wallis test with post-hoc analysis using Dunn's test corrected for multiple comparisons, and pairwise comparisons without pictured bars were not significant (\* =  $p < 0.05$ , \*\* =  $p < 0.01$ , \*\*\* =  $p < 0.001$ ). Bars represent mean  $\pm$  SEM. **(B)** Comparison of day 35 SARS-2 RBD ELISA endpoint titers in the Nanoparticle and Trimer<sup>hg</sup> cohorts. Statistical significance was determined using the Mann-Whitney U test (ns = not significant). Bars represent mean  $\pm$  SEM. **(C)** Day 35 serum samples assayed against rsSARS-1 and rsWIV1 RBDs no longer show statistically significant differences in binding compared to SARS-2 RBD as determined using the Kruskal-Wallis test with post-hoc analysis using Dunn's test corrected for multiple comparisons. Bars represent mean  $\pm$  SEM. **(D)** Comparison of day 35 SARS-2 pseudovirus neutralization in the Nanoparticle and Trimer<sup>hg</sup> cohorts. Statistical significance was determined using the Mann-Whitney U test (ns = not significant). Bars represent

mean  $\pm$  SEM. **(E)** Day 35 serum was assayed in ELISA against SARS-2 RBD (WT) and SARS-2 RBD with K417N, E484K, and N501Y mutations (B.1.351). Statistical significance was determined using the Wilcoxon sign rank test (\* =  $p < 0.05$ , \*\* =  $p < 0.01$ ).

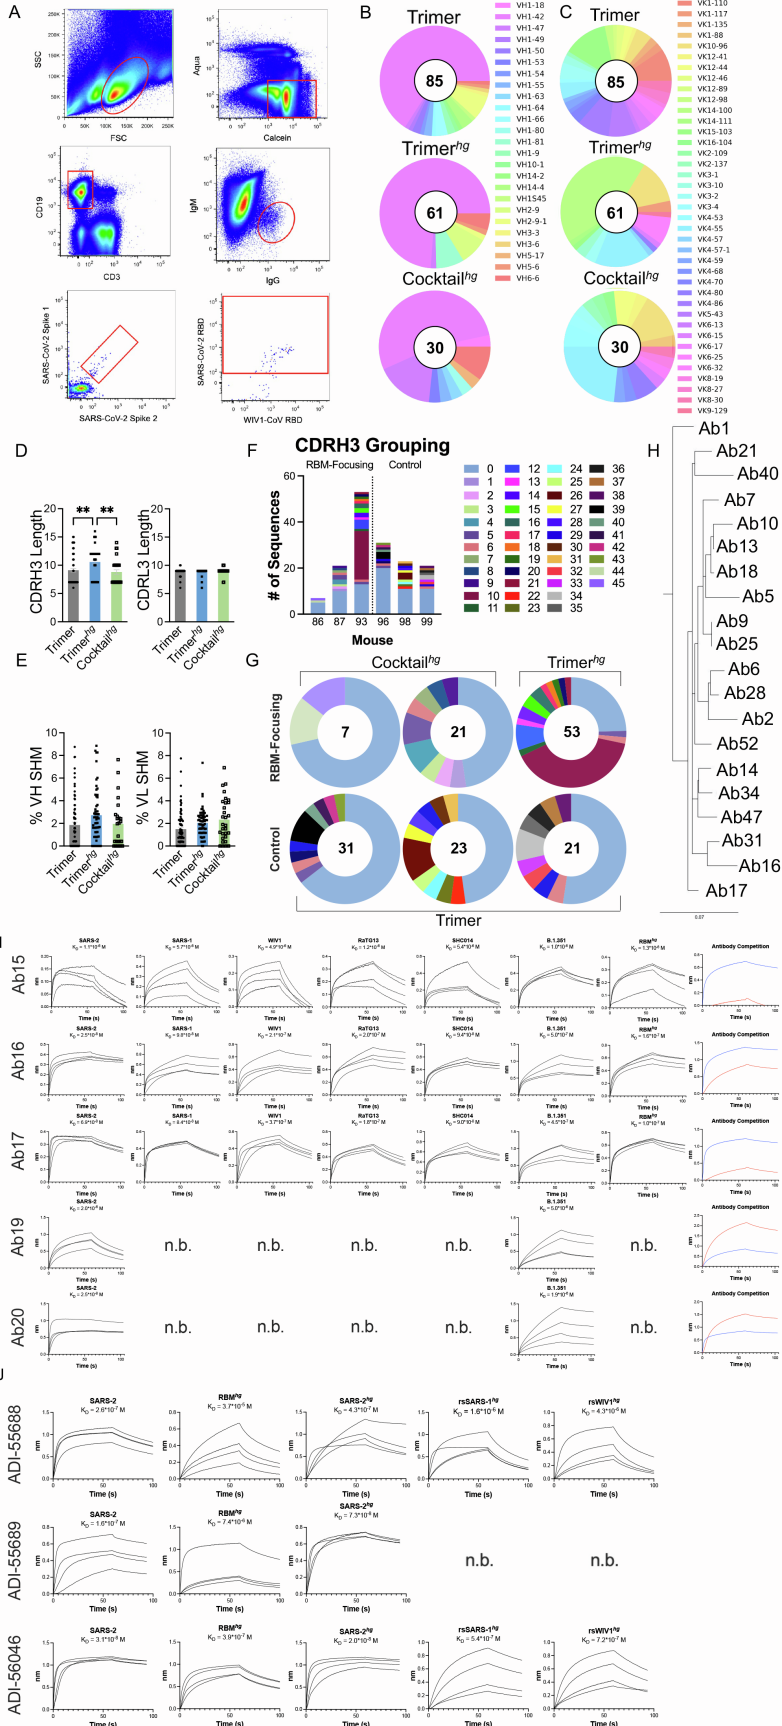

**Figure S6** (related to **Fig. 5**). **SARS-2 RBD-directed B cell characteristics.** **(A)** Gating scheme for isolating IgG<sup>+</sup> B cells that are SARS-2 spike double-positive and SARS-CoV-2 RBD positive. Spleens were harvested at day 42 and SARS-2 RBD-directed IgG<sup>+</sup> B cells were isolated via flow cytometry and sequenced. B cell receptor sequencing was used to characterize **(B)** heavy and **(C)** light chain V-gene usage. All gene families listed are \*01 except VH1-84\*02. Complementarity determining region 3 (CDR3) length **(D)** and percent somatic hypermutation (SHM) **(E)** were also analyzed for each sequence. SHM was not analyzed for cohorts with uncertain IMGT V-gene assignments. Statistical significance was determined using the Kruskal-Wallis test with post-hoc analysis using Dunn's test corrected for multiple comparisons, and pairwise comparisons without pictured bars were not significant (\* =  $p < 0.05$ , \*\* =  $p < 0.01$ ). Bars represent mean  $\pm$  SEM. Within each mouse, clonal lineages were analyzed on the basis of CDRH3 similarity. CDRH3 groupings are represented by count **(F)** and proportion **(G)** within each mouse. Not all sequences were successfully grouped into lineages. **(H)** Phylogenetic tree of a large clonal lineage containing Ab16 and Ab17 generated using Cloanlyst to infer common ancestors. **(I)** BLI was performed using Fabs representative of lineages expanded in RBM-focusing cohorts. Ni-NTA biosensors were used with Fabs bound to the sensor using the 8xHis tag and RBDs in solution as the analyte. Titrations were performed at 10  $\mu$ M, 5  $\mu$ M, 2.5  $\mu$ M, and 1  $\mu$ M. Vendor-supplied software was used to generate an apparent  $K_D$ . **(J)** Conformationally specific Fabs ADI-55688, ADI-55689, and ADI-56046, which target a conserved RBM epitope, were used to assess binding to the RBM<sup>hg</sup>, SARS-2<sup>hg</sup>, rsSARS-1<sup>hg</sup>, and rsWIV1<sup>hg</sup> monomers via BLI. FAB2G sensors were used with immobilized fabs; coronavirus proteins were the analytes. Titrations were performed at 10  $\mu$ M, 5  $\mu$ M, 2.5  $\mu$ M, and 1.25  $\mu$ M (SARS-2 RBD and SARS-2<sup>hg</sup> with ADI-55689, SARS-2 RBD and SARS-2<sup>hg</sup> with ADI-56046, all titrations with RBM<sup>hg</sup>); 3  $\mu$ M, 1.5  $\mu$ M, 0.75  $\mu$ M, and 0.375  $\mu$ M (rsSARS-1<sup>hg</sup> and rsWIV1<sup>hg</sup> with ADI-56046); 10  $\mu$ M, 5  $\mu$ M, 2.5  $\mu$ M, and 1  $\mu$ M (all titrations with ADI-55688 except RBM<sup>hg</sup>). Minimal binding was detected to ADI-55689 Fab with rsSARS-1<sup>hg</sup> and rsWIV1<sup>hg</sup>. Vendor-supplied software was used to generate an apparent  $K_D$ .

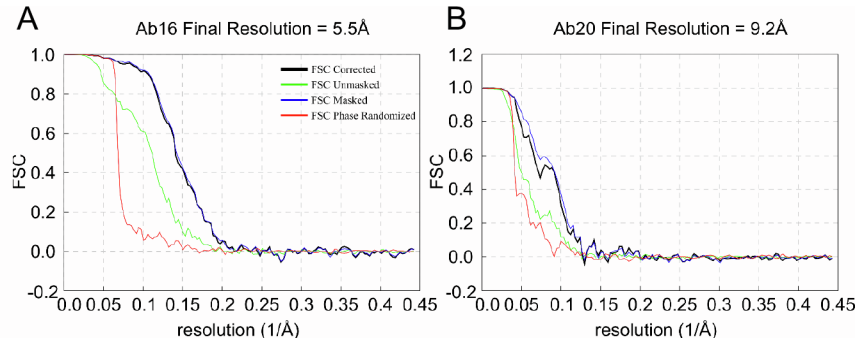

**Figure S7** (related to **Fig. 6**). **Supporting data for moderate-resolution structures of Ab16 and Ab20 complexes.** Fourier shell correlation plots show the nominal resolution of the spike complex of Ab16 is 5.5 Å (**A**) and Ab20 is 9.2 Å (**B**) (0.143 cutoff).

| Antibody | VH Sequence                                                                                                                                                                                                                                                                                                                                                                                    | VL Sequence                                                                                                                                                                                                                                                                                                                                            |
|----------|------------------------------------------------------------------------------------------------------------------------------------------------------------------------------------------------------------------------------------------------------------------------------------------------------------------------------------------------------------------------------------------------|--------------------------------------------------------------------------------------------------------------------------------------------------------------------------------------------------------------------------------------------------------------------------------------------------------------------------------------------------------|
| Ab15     | GAGGTCCAGCTGCAGCAGTCTGGACCTGAGCTGGTGAAGCCTGGGGCTTCAGT<br>GAAGATATCCTGCAAGGCTTCTGGTTACTCATTCACTGGCTACTACATGAAGTGG<br>GTGAAGCAAAGTCTGAAAAGAGCCTTGAGTGGATTGGAGAGATTAATCCTAACTT<br>TGGTGGTACTACCTACAACCAGAAGTTCAGGCCAAGGCCACATTGACTGTAGAC<br>AAATCCTCCAGCACAGCTACATGCAGCTCAAGAGCCTGACATCTGAGGACTCTG<br>CAGTCTATTACTGTGCAAGATACTATGTAACCTCTATGCTATGGACTACTGGGGT<br>CAAGGAACCTCAGTACCCTCTCC          | GACATCCTGATGACCCAGTCTCCATCCTCCATGTCTGTATCTCTGGGAGACACAG<br>TCAGCATCACTTGCCATGCAAGTCAGGGCATTAGCAGTAATATAGGGTGGTTGCA<br>GCAGAAACCAGGGAAATCATTAAAGGGCCTGATCTATCATGGAAACCACTTGGAA<br>GATGGAGTTCATCAAGTTCAGTGGCAGTGGATCTGGAGCAGCTTATTCTCTCA<br>CCATCAGCAGCCTGGAATCTGAAGATTTGACAGACTATTACTGTGTACAGTATACT<br>CATTTCCGTACAGTTCGGAGGGGGACCAAGCTGGAATAAAA        |
| Ab16     | GAGGTCCAGCTGCAGCAGTCTGGACCTGAGCTGGTGAAGCCTGGGGCTTCAGT<br>GAAGATATCCTGCAAGGCTTCTGGTTACTCATTAACTACTACATGAAGTGGG<br>TGAAGCAGAGTCTGAAAAGAGCCTTGAGTGGATTGGAGAGATTAATCCTAACTC<br>TGGTTACTTCCACAACCAGAAGTTCAGGGCCAAGGCCACATTGACTGTAGACA<br>AATCCTCCACCACAGCCTACATGCAGCTCAAGAGCCTGACATCTGAGGACTCTGC<br>GGTCTATTACTGTGCAAGATACTTTGGTAACTCTTTGCTATGGACTCTGGGGT<br>CAAGGAACCTCAGTACCCTCTCC                | GACATCCTGATGACCCAATCTCCATCCTCCATGTCTGTATCTCTGGGAGACACAGT<br>CAGCATCACTTGCCATGCAAGTCAGGGCATTGGCAGTAATATAGGGTGGTTGCAG<br>CAGAAACCAGGGAAATCATTAAAGGGCCTGATCTATCTGGAACCAACTTGAAGA<br>TGGAGTTCATCAAGTTCAGTGGCAGTGGATCTGGAGCAGATTATTCTCTCACC<br>ATCAGCAGCCTGGAATCTGAAGATTTTGCAGACTATTACTGTGTACAGTATGTTCA<br>GTTCCGTACAGTTCGGAGGGGGACCAAGCTGGAATAAAA          |
| Ab17     | GAGGTCCAGCTGCAGCAGTCTGGACCTGAGCTGGTGAAGCCTGGGGCTTCAGT<br>GAAGATATCCTGCAAGGCTTCTGGTTACTCATTCACTGACTACTACATGAAGTGG<br>TGAAGCAAAGTCTGAAAAGAGCCTTGAGTGGATTGGAGAGATTAATCCTAACTC<br>GGTGGTACTACCTACAACCAGAAGTTCAGGCCAAGGCCACATTGACTGTAGACA<br>AATCCTCCAGCACAGCCTACATGCAGCTCAAGAGCCTGACATCTGAGGACTCTGC<br>AGTCTATTACTGTGCAAGATACTATGTAACCTCTATGCTATGGACTACTGGGGT<br>AAGGAACCTCAGTACCCTCTCTCA          | GACATCCTGATGACCCAATCTCCATCCTCCATGTCTGTATCTCTGGGAGACACAGT<br>CAGCATCACATGCCATGCAAGTCAGGGCATAAGTAGTAATATAGGGTGGTTGCAG<br>CAGAAACCAGGGAAATCATTAAAGGGCCTGATCTATCATGGAACCAACTTGAAGA<br>TGGAGTTCATCAAGTTCAGTGGCAGTGGATCTGGAGCAGATTATTCTCTCACC<br>ATCAGCAGCCTGGAATCTGAAGATTTTGCAGACTATTACTGTGTACAGTATGTTCA<br>GTTCCGTACAGTTCGGAGGGGGACCAAGCTGGAATAAAA         |
| Ab19     | CAGGTTCCAGCTGCAGCAGTCTGGACCTGAGCTGGCGAGGCCTGGGGCTTCAGT<br>GAAGCTGCTGCAAGGCTTCTGGTACCCTTCACAAGCTATGGTATAAACTGG<br>GTGAAGCAGAGAACTGGACAGGGCCTTGAGTGGATTGGAGAGATTAATCCTAGAA<br>TTGGAATACTTACTATAATGAGAAGTTCAGGGCCAAGGCCACACTGACTGCAGAC<br>AAATCCTCCAGCACAGCCTACATGGAGTTCAGCAGCCTGACATCTGAGGACTCTG<br>CGGTCTATTTCTGTGCAAGATCGTGAATAGTAACCTACGGGGAGTACTACTTTGA<br>CTACTGGGGCCAAGGCACCCTCTCAGACTCTCC | GACATTGTGATGACCCAGTCTCACAATTCATGTCCACATCAATAGGAGACAGGGT<br>CAGCATCACCTGCAAGGCCAGTCAGGATGTGAGTACTGCTGTAGCCTGGTATCAA<br>CAAAAACCAGGGCAATCTCCTAAGTTACTGATTACTGGGCATCCACCCGGCACAC<br>TGGAGTCCCTGATCGCTTCACAGGCAGTGGATCTGGGACAGATTATACTCTCACC<br>ATTAGAAGTGTGCAGGCAGAAGACCTGGCCTTTATTACTGTGCAACCAATTATAG<br>CACTCCGTACAGTTCGGAGGGGGACCAAGCTGGAATAAAA        |
| Ab20     | GAGGTCCAGCTGCAGCAGTCTGGACCTGAGCTGGTGAAGCCTGGGGCTTCAGT<br>GAAGATATCCTGCAAGGCTTCTGGTTCTCATTCACTGGCTACTCCATGAAGTGG<br>TGAACAAGTCTGAAAAGAGCCTTGAGTGGATTGGAGAAATTAATCCTACCCTG<br>GGTGGTACTACCTACAACCAGAAGTTCAGGCCAAGGCCACATTGACTGTAGACA<br>AATCCTCCAGCACAGCCTACATAACAACCTCAAGAGCCTGACATCTGAGGACTCTGCA<br>GTCTATTACTGTGCAAGGGCCGGGCCACTACTGGGGCCAAGGCACCCTCTC<br>ACAGTCTCTCA                         | GACATTGTGCTACCCAATCTCCAGCTTCTTTGGCTGTGTCTTAGGGCAGAGAG<br>CCACCATCTCCTGCAGAGCCAGTGAAGTGTGAATATTATGGCACAGGTTTGT<br>GCAGTGGTCCACAGAAACCAGGACAGCCCAAACTCCTCATCTATGCTGCC<br>TCCAACGTGGAATCTGGGGTCCCTGCCAGGTTTGTGGCAGTGGGCTGGGACA<br>GACTTCAGCCTCAACATCCATTCTGTGGAGGAGGATGATATTGCAATGATTTCTG<br>TCACCAAAGTAGGAAGCTTCCTGGAGCTTCGGTGGAGGCACCAAGCTGGAAT<br>CAAA |

**Table S1** (related to **Fig. 5**). VH and VL sequences for antibodies selected for recombinant expression and characterization as shown in **Fig. 5E**.

|                                              | <b>Ab17 in complex with SARS-2 RBD</b> |
|----------------------------------------------|----------------------------------------|
| <b>Wavelength (Å)</b>                        | 0.9792                                 |
| <b>Resolution range (Å)</b>                  | 74.66 - 3.5 (3.625 - 3.5)              |
| <b>Space group</b>                           | P 41 21 2                              |
| <b>Unit cell (Å)</b>                         | 207.931 207.931 86.662                 |
| <b>(°)</b>                                   | 90 90 90                               |
| <b>Total reflections</b>                     | 513207 (54030)                         |
| <b>Unique reflections</b>                    | 24538 (2401)                           |
| <b>Multiplicity</b>                          | 20.9 (22.5)                            |
| <b>Completeness (%)</b>                      | 99.98 (100.00)                         |
| <b>Mean I/sigma(I)</b>                       | 13.89 (3.37)                           |
| <b>Wilson B-factor</b>                       | 104.62                                 |
| <b>R<sub>merge</sub></b>                     | 0.3361 (1.898)                         |
| <b>R<sub>meas</sub></b>                      | 0.3446 (1.942)                         |
| <b>R<sub>pim</sub></b>                       | 0.07551 (0.4066)                       |
| <b>CC1/2</b>                                 | 0.998 (0.85)                           |
| <b>CC*</b>                                   | 0.999 (0.959)                          |
| <b>Reflections used in refinement</b>        | 24537 (2401)                           |
| <b>Reflections used for R<sub>free</sub></b> | 1206 (118)                             |
| <b>R<sub>work</sub></b>                      | 0.296 (0.339)                          |
| <b>R<sub>free</sub></b>                      | 0.345 (0.405)                          |
| <b>CC(work)</b>                              | 0.799 (0.738)                          |
| <b>CC(free)</b>                              | 0.777 (0.583)                          |
| <b>Protein residues</b>                      | 1178                                   |
| <b>RMS (bonds) (Å)</b>                       | 0.003                                  |
| <b>RMS (angles) (°)</b>                      | 0.80                                   |
| <b>Ramachandran favored (%)</b>              | 94.99                                  |
| <b>Ramachandran allowed (%)</b>              | 4.83                                   |
| <b>Ramachandran outliers (%)</b>             | 0.18                                   |
| <b>Rotamer outliers (%)</b>                  | 0.00                                   |
| <b>Clashscore</b>                            | 13.81                                  |
| <b>Average B-factor</b>                      | 95.58                                  |

**Table S2 (related to Fig. 6). Crystallographic data and refinement statistics.** Statistics for the highest-resolution shell are shown in parentheses.



| Oligo Name | Sequence - 5' to 3'             |
|------------|---------------------------------|
| MsVHE_F    | GGGAATTCGAGGTGCAGCTGCAGGAGTCTGG |
| CyR_ext1   | AGGGAAATARCCCTTGACCAG           |
| CyR_ext2   | AGGGAAGTAGCCTTTGACAAG           |
| CyR_int1   | GGCCAGTGGATAGACHGATG            |
| CyR_int2   | CAGGGACCAAGGGATAGACA            |
| mCk_ext    | GCACCTCCAGATGTAACTG             |
| mCk_int    | GATGGTGGGAAGATGGATAC            |
| Vk1_ext    | TGATGACCCARACTCCACT             |
| Vk2_ext    | GCTTGTGCTCTGGATCCC              |
| Vk3_ext    | CTGCTGCTCTGGGTTC                |
| Vk4_ext    | CAGCTTCCTGCTAATCAGTG            |
| Vk5_ext    | CTCAGATCCTTGGACTTHTG            |
| Vk6_ext    | TGGAGTCACAGACYCAGG              |
| Vk7_ext    | TGGAGTTTCAGACCCAGG              |
| Vk8_ext    | CTGCTMTGGGTATCTGGT              |
| Vk9_ext    | CWTCTTGTGCTCTGGTTTC             |
| Vk10_ext   | GATGTCCTCTGCTCAGTTC             |
| Vk11_ext   | CCTGCTGAGTTCCTTGGG              |
| Vk12_ext   | CTGCTGCTGTGGCTTACA              |
| Vk13_ext   | CCTTCTCAACTTCTGCTCT             |
| Vk14_ext   | AGGGCCCYTGCTCAGTTT              |
| Vk15_ext   | ATGAGGGTCCTTGCTGAG              |
| Vk16_ext   | GAGGTTCCAGGTTCAGGT              |
| Vk17_ext   | CCATGACCATGYTCTCACT             |
| Vk18_ext   | ATGGAACTCCAGCTTCATTT            |
| Vk19_ext   | ATGAGACCGTCTATTCAGTT            |
| Vk1_int    | CCTGTCAGTCTTGGAGATCA            |
| Vk1_2_int  | TTTGTGCGTTACCATTGGACAA          |
| Vk2_int    | SRGATATTGTGATGACGCAGG           |
| Vk3_int    | ATGTGCTGACCCAATCTCC             |
| Vk4_int    | AWTGTKCTCACCCAGTCTCC            |
| Vk5_int    | GTCTCCAGCCACCCTGTC              |
| Vk6_int    | TGATGACCCAGTCTCMCAAAT           |
| Vk7_int    | GCCTGTGCAGACATGTGAT             |
| Vk8_int    | CCTGTGGGGACATTGTGATG            |
| Vk9_int    | ACATCCRGATGACYCAGTCT            |
| Vk10_int   | CCAGATGTGATATCCAGATG            |
| Vk11_int   | GCCAGATGTGATGTYCAAATG           |
| Vk12_int   | ATCCAGATGACTCAGTCTCC            |
| Vk13_int   | CCTGATATGTGACATCCRVAT           |
| Vk14_int   | MAGATGACCCAGTCTCCATC            |
| Vk15_int   | TGAGATGTGACATCCAGATGA           |
| Vk16_int   | CCAGTGTGATGTCCAGATAAC           |
| Vk17_int   | ACAACCTGTGACCCAGTCTCC           |
| Vk18_int   | ACACAGGCTCCAGCTTCTCT            |
| Vk19_int   | GTGCTCAGTGTGACATCCAG            |

**Table S3** (related to **STAR Methods**). **Murine B cell receptor sequencing primers**. Primers originally published in Rohatgi et al., 2008 or Tiller et al., 2009 used for murine B cell receptor sequencing.

| <b><u>B Cell Receptor Sequence</u></b> | <b><u>Accession Number</u></b> |
|----------------------------------------|--------------------------------|
| VH_1_A2 variable heavy chain           | OM728968                       |
| VH_1_A4 variable heavy chain           | OM728969                       |
| VH_1_A6 variable heavy chain           | OM728970                       |
| VH_1_A7 variable heavy chain           | OM728971                       |
| VH_1_A8 variable heavy chain           | OM728972                       |
| VH_1_A10 variable heavy chain          | OM728973                       |
| VH_1_A11 variable heavy chain          | OM728974                       |
| VH_1_B4 variable heavy chain           | OM728975                       |
| VH_1_B6 variable heavy chain           | OM728976                       |
| VH_1_B8 variable heavy chain           | OM728977                       |
| VH_1_B9 variable heavy chain           | OM728978                       |
| VH_1_B12 variable heavy chain          | OM728979                       |
| VH_1_C1 variable heavy chain           | OM728980                       |
| VH_1_C2 variable heavy chain           | OM728981                       |
| VH_1_C3 variable heavy chain           | OM728982                       |
| VH_1_C4 variable heavy chain           | OM728983                       |
| VH_1_C5 variable heavy chain           | OM728984                       |
| VH_1_C7 variable heavy chain           | OM728985                       |
| VH_1_C9 variable heavy chain           | OM728986                       |
| VH_1_C12 variable heavy chain          | OM728987                       |
| VH_1_D5 variable heavy chain           | OM728988                       |
| VH_1_D6 variable heavy chain           | OM728989                       |
| VH_1_D7 variable heavy chain           | OM728990                       |
| VH_1_D10 variable heavy chain          | OM728991                       |
| VH_1_D11 variable heavy chain          | OM728992                       |
| VH_1_D12 variable heavy chain          | OM728993                       |
| VH_2_A1 variable heavy chain           | OM728994                       |
| VH_2_A2 variable heavy chain           | OM728995                       |
| VH_2_A5 variable heavy chain           | OM728996                       |
| VH_2_A8 variable heavy chain           | OM728997                       |
| VH_2_B1 variable heavy chain           | OM728998                       |
| VH_2_B4 variable heavy chain           | OM728999                       |
| VH_2_B5 variable heavy chain           | OM729000                       |
| VH_2_B7 variable heavy chain           | OM729001                       |
| VH_2_B8 variable heavy chain           | OM729002                       |
| VH_2_C2 variable heavy chain           | OM729003                       |
| VH_2_C3 variable heavy chain           | OM729004                       |
| VH_2_C4 variable heavy chain           | OM729005                       |
| VH_2_C6 variable heavy chain           | OM729006                       |
| VH_2_C8 variable heavy chain           | OM729007                       |
| VH_2_C9 variable heavy chain           | OM729008                       |
| VH_2_C10 variable heavy chain          | OM729009                       |
| VH_2_C11 variable heavy chain          | OM729010                       |
| VH_2_D1 variable heavy chain           | OM729011                       |
| VH_2_D2 variable heavy chain           | OM729012                       |
| VH_2_D4 variable heavy chain           | OM729013                       |
| VH_2_D5 variable heavy chain           | OM729014                       |
| VH_2_D6 variable heavy chain           | OM729015                       |

|                               |          |
|-------------------------------|----------|
| VH_2_D8 variable heavy chain  | OM729016 |
| VH_2_D9 variable heavy chain  | OM729017 |
| VH_2_D10 variable heavy chain | OM729018 |
| VH_2_D11 variable heavy chain | OM729019 |
| VH_2_E2 variable heavy chain  | OM729020 |
| VH_2_E3 variable heavy chain  | OM729021 |
| VH_2_E4 variable heavy chain  | OM729022 |
| VH_2_E5 variable heavy chain  | OM729023 |
| VH_2_E6 variable heavy chain  | OM729024 |
| VH_2_E7 variable heavy chain  | OM729025 |
| VH_2_E8 variable heavy chain  | OM729026 |
| VH_2_E9 variable heavy chain  | OM729027 |
| VH_2_E12 variable heavy chain | OM729028 |
| VH_2_F2 variable heavy chain  | OM729029 |
| VH_2_F3 variable heavy chain  | OM729030 |
| VH_2_F4 variable heavy chain  | OM729031 |
| VH_2_F5 variable heavy chain  | OM729032 |
| VH_2_F6 variable heavy chain  | OM729033 |
| VH_2_F7 variable heavy chain  | OM729034 |
| VH_2_F8 variable heavy chain  | OM729035 |
| VH_2_F10 variable heavy chain | OM729036 |
| VH_2_F11 variable heavy chain | OM729037 |
| VH_2_F12 variable heavy chain | OM729038 |
| VH_2_G2 variable heavy chain  | OM729039 |
| VH_2_G3 variable heavy chain  | OM729040 |
| VH_2_G4 variable heavy chain  | OM729041 |
| VH_2_G5 variable heavy chain  | OM729042 |
| VH_2_G6 variable heavy chain  | OM729043 |
| VH_2_G7 variable heavy chain  | OM729044 |
| VH_2_G8 variable heavy chain  | OM729045 |
| VH_2_G9 variable heavy chain  | OM729046 |
| VH_2_G10 variable heavy chain | OM729047 |
| VH_2_G11 variable heavy chain | OM729048 |
| VH_2_H5 variable heavy chain  | OM729049 |
| VH_2_H7 variable heavy chain  | OM729050 |
| VH_2_H8 variable heavy chain  | OM729051 |
| VH_2_H9 variable heavy chain  | OM729052 |
| VH_4_A2 variable heavy chain  | OM729053 |
| VH_4_A3 variable heavy chain  | OM729054 |
| VH_4_A4 variable heavy chain  | OM729055 |
| VH_4_A5 variable heavy chain  | OM729056 |
| VH_4_A7 variable heavy chain  | OM729057 |
| VH_4_A8 variable heavy chain  | OM729058 |
| VH_4_A10 variable heavy chain | OM729059 |
| VH_4_B1 variable heavy chain  | OM729060 |
| VH_4_B2 variable heavy chain  | OM729061 |
| VH_4_B3 variable heavy chain  | OM729062 |
| VH_4_B4 variable heavy chain  | OM729063 |
| VH_4_B5 variable heavy chain  | OM729064 |

|                               |          |
|-------------------------------|----------|
| VH_4_B6 variable heavy chain  | OM729065 |
| VH_4_B8 variable heavy chain  | OM729066 |
| VH_4_C2 variable heavy chain  | OM729067 |
| VH_4_C3 variable heavy chain  | OM729068 |
| VH_4_C6 variable heavy chain  | OM729069 |
| VH_4_C8 variable heavy chain  | OM729070 |
| VH_4_C9 variable heavy chain  | OM729071 |
| VH_4_C10 variable heavy chain | OM729072 |
| VH_4_C11 variable heavy chain | OM729073 |
| VH_4_C12 variable heavy chain | OM729074 |
| VH_4_D2 variable heavy chain  | OM729075 |
| VH_4_D3 variable heavy chain  | OM729076 |
| VH_4_D4 variable heavy chain  | OM729077 |
| VH_4_D5 variable heavy chain  | OM729078 |
| VH_4_D6 variable heavy chain  | OM729079 |
| VH_4_D7 variable heavy chain  | OM729080 |
| VH_4_D9 variable heavy chain  | OM729081 |
| VH_4_D10 variable heavy chain | OM729082 |
| VH_5_A2 variable heavy chain  | OM729083 |
| VH_5_A3 variable heavy chain  | OM729084 |
| VH_5_A6 variable heavy chain  | OM729085 |
| VH_5_A10 variable heavy chain | OM729086 |
| VH_5_A12 variable heavy chain | OM729087 |
| VH_5_B1 variable heavy chain  | OM729088 |
| VH_5_B3 variable heavy chain  | OM729089 |
| VH_5_B4 variable heavy chain  | OM729090 |
| VH_5_B5 variable heavy chain  | OM729091 |
| VH_5_B8 variable heavy chain  | OM729092 |
| VH_5_B9 variable heavy chain  | OM729093 |
| VH_5_B12 variable heavy chain | OM729094 |
| VH_5_C1 variable heavy chain  | OM729095 |
| VH_5_C2 variable heavy chain  | OM729096 |
| VH_5_C3 variable heavy chain  | OM729097 |
| VH_5_C4 variable heavy chain  | OM729098 |
| VH_5_C6 variable heavy chain  | OM729099 |
| VH_5_C8 variable heavy chain  | OM729100 |
| VH_5_C9 variable heavy chain  | OM729101 |
| VH_5_C11 variable heavy chain | OM729102 |
| VH_5_D1 variable heavy chain  | OM729103 |
| VH_5_D3 variable heavy chain  | OM729104 |
| VH_5_D4 variable heavy chain  | OM729105 |
| VH_5_D6 variable heavy chain  | OM729106 |
| VH_5_D7 variable heavy chain  | OM729107 |
| VH_5_D8 variable heavy chain  | OM729108 |
| VH_5_D9 variable heavy chain  | OM729109 |
| VH_5_D11 variable heavy chain | OM729110 |
| VH_5_D12 variable heavy chain | OM729111 |
| VH_5_E1 variable heavy chain  | OM729112 |
| VH_5_E3 variable heavy chain  | OM729113 |

|                               |          |
|-------------------------------|----------|
| VH_5_E5 variable heavy chain  | OM729114 |
| VH_5_E6 variable heavy chain  | OM729115 |
| VH_5_E7 variable heavy chain  | OM729116 |
| VH_5_E9 variable heavy chain  | OM729117 |
| VH_5_E10 variable heavy chain | OM729118 |
| VH_5_E11 variable heavy chain | OM729119 |
| VH_5_E12 variable heavy chain | OM729120 |
| VH_5_F1 variable heavy chain  | OM729121 |
| VH_5_F2 variable heavy chain  | OM729122 |
| VH_5_F3 variable heavy chain  | OM729123 |
| VH_5_F5 variable heavy chain  | OM729124 |
| VH_5_F6 variable heavy chain  | OM729125 |
| VH_5_F8 variable heavy chain  | OM729126 |
| VH_5_F10 variable heavy chain | OM729127 |
| VH_5_F12 variable heavy chain | OM729128 |
| VH_5_G1 variable heavy chain  | OM729129 |
| VH_5_G2 variable heavy chain  | OM729130 |
| VH_5_G3 variable heavy chain  | OM729131 |
| VH_5_G4 variable heavy chain  | OM729132 |
| VH_5_G5 variable heavy chain  | OM729133 |
| VH_5_G6 variable heavy chain  | OM729134 |
| VH_5_G7 variable heavy chain  | OM729135 |
| VH_5_G9 variable heavy chain  | OM729136 |
| VH_5_G10 variable heavy chain | OM729137 |
| VH_5_G12 variable heavy chain | OM729138 |
| VH_5_H1 variable heavy chain  | OM729139 |
| VH_5_H4 variable heavy chain  | OM729140 |
| VH_5_H6 variable heavy chain  | OM729141 |
| VH_5_H8 variable heavy chain  | OM729142 |
| VH_5_H11 variable heavy chain | OM729143 |
| VL_1_A2 variable light chain  | OM729144 |
| VL_1_A4 variable light chain  | OM729145 |
| VL_1_A6 variable light chain  | OM729146 |
| VL_1_A7 variable light chain  | OM729147 |
| VL_1_A8 variable light chain  | OM729148 |
| VL_1_A10 variable light chain | OM729149 |
| VL_1_A11 variable light chain | OM729150 |
| VL_1_B4 variable light chain  | OM729151 |
| VL_1_B6 variable light chain  | OM729152 |
| VL_1_B8 variable light chain  | OM729153 |
| VL_1_B9 variable light chain  | OM729154 |
| VL_1_B12 variable light chain | OM729155 |
| VL_1_C1 variable light chain  | OM729156 |
| VL_1_C2 variable light chain  | OM729157 |
| VL_1_C3 variable light chain  | OM729158 |
| VL_1_C4 variable light chain  | OM729159 |
| VL_1_C5 variable light chain  | OM729160 |
| VL_1_C7 variable light chain  | OM729161 |
| VL_1_C9 variable light chain  | OM729162 |

|                               |          |
|-------------------------------|----------|
| VL_1_C12 variable light chain | OM729163 |
| VL_1_D5 variable light chain  | OM729164 |
| VL_1_D6 variable light chain  | OM729165 |
| VL_1_D7 variable light chain  | OM729166 |
| VL_1_D10 variable light chain | OM729167 |
| VL_1_D11 variable light chain | OM729168 |
| VL_1_D12 variable light chain | OM729169 |
| VL_2_A1 variable light chain  | OM729170 |
| VL_2_A2 variable light chain  | OM729171 |
| VL_2_A5 variable light chain  | OM729172 |
| VL_2_A8 variable light chain  | OM729173 |
| VL_2_B1 variable light chain  | OM729174 |
| VL_2_B4 variable light chain  | OM729175 |
| VL_2_B5 variable light chain  | OM729176 |
| VL_2_B7 variable light chain  | OM729177 |
| VL_2_B8 variable light chain  | OM729178 |
| VL_2_C2 variable light chain  | OM729179 |
| VL_2_C3 variable light chain  | OM729180 |
| VL_2_C4 variable light chain  | OM729181 |
| VL_2_C6 variable light chain  | OM729182 |
| VL_2_C8 variable light chain  | OM729183 |
| VL_2_C9 variable light chain  | OM729184 |
| VL_2_C10 variable light chain | OM729185 |
| VL_2_C11 variable light chain | OM729186 |
| VL_2_D1 variable light chain  | OM729187 |
| VL_2_D2 variable light chain  | OM729188 |
| VL_2_D4 variable light chain  | OM729189 |
| VL_2_D5 variable light chain  | OM729190 |
| VL_2_D6 variable light chain  | OM729191 |
| VL_2_D8 variable light chain  | OM729192 |
| VL_2_D9 variable light chain  | OM729193 |
| VL_2_D10 variable light chain | OM729194 |
| VL_2_D11 variable light chain | OM729195 |
| VL_2_E2 variable light chain  | OM729196 |
| VL_2_E3 variable light chain  | OM729197 |
| VL_2_E4 variable light chain  | OM729198 |
| VL_2_E5 variable light chain  | OM729199 |
| VL_2_E6 variable light chain  | OM729200 |
| VL_2_E7 variable light chain  | OM729201 |
| VL_2_E8 variable light chain  | OM729202 |
| VL_2_E9 variable light chain  | OM729203 |
| VL_2_E12 variable light chain | OM729204 |
| VL_2_F2 variable light chain  | OM729205 |
| VL_2_F3 variable light chain  | OM729206 |
| VL_2_F4 variable light chain  | OM729207 |
| VL_2_F5 variable light chain  | OM729208 |
| VL_2_F6 variable light chain  | OM729209 |
| VL_2_F7 variable light chain  | OM729210 |
| VL_2_F8 variable light chain  | OM729211 |

|                               |          |
|-------------------------------|----------|
| VL_2_F10 variable light chain | OM729212 |
| VL_2_F11 variable light chain | OM729213 |
| VL_2_F12 variable light chain | OM729214 |
| VL_2_G2 variable light chain  | OM729215 |
| VL_2_G3 variable light chain  | OM729216 |
| VL_2_G4 variable light chain  | OM729217 |
| VL_2_G5 variable light chain  | OM729218 |
| VL_2_G6 variable light chain  | OM729219 |
| VL_2_G7 variable light chain  | OM729220 |
| VL_2_G8 variable light chain  | OM729221 |
| VL_2_G9 variable light chain  | OM729222 |
| VL_2_G10 variable light chain | OM729223 |
| VL_2_G11 variable light chain | OM729224 |
| VL_2_H5 variable light chain  | OM729225 |
| VL_2_H7 variable light chain  | OM729226 |
| VL_2_H8 variable light chain  | OM729227 |
| VL_2_H9 variable light chain  | OM729228 |
| VL_4_A2 variable light chain  | OM729229 |
| VL_4_A3 variable light chain  | OM729230 |
| VL_4_A4 variable light chain  | OM729231 |
| VL_4_A5 variable light chain  | OM729232 |
| VL_4_A7 variable light chain  | OM729233 |
| VL_4_A8 variable light chain  | OM729234 |
| VL_4_A10 variable light chain | OM729235 |
| VL_4_B1 variable light chain  | OM729236 |
| VL_4_B2 variable light chain  | OM729237 |
| VL_4_B3 variable light chain  | OM729238 |
| VL_4_B4 variable light chain  | OM729239 |
| VL_4_B5 variable light chain  | OM729240 |
| VL_4_B6 variable light chain  | OM729241 |
| VL_4_B8 variable light chain  | OM729242 |
| VL_4_C2 variable light chain  | OM729243 |
| VL_4_C3 variable light chain  | OM729244 |
| VL_4_C6 variable light chain  | OM729245 |
| VL_4_C8 variable light chain  | OM729246 |
| VL_4_C9 variable light chain  | OM729247 |
| VL_4_C10 variable light chain | OM729248 |
| VL_4_C11 variable light chain | OM729249 |
| VL_4_C12 variable light chain | OM729250 |
| VL_4_D2 variable light chain  | OM729251 |
| VL_4_D3 variable light chain  | OM729252 |
| VL_4_D4 variable light chain  | OM729253 |
| VL_4_D5 variable light chain  | OM729254 |
| VL_4_D6 variable light chain  | OM729255 |
| VL_4_D7 variable light chain  | OM729256 |
| VL_4_D9 variable light chain  | OM729257 |
| VL_4_D10 variable light chain | OM729258 |
| VL_5_A2 variable light chain  | OM729259 |
| VL_5_A3 variable light chain  | OM729260 |

|                               |          |
|-------------------------------|----------|
| VL_5_A6 variable light chain  | OM729261 |
| VL_5_A10 variable light chain | OM729262 |
| VL_5_A12 variable light chain | OM729263 |
| VL_5_B1 variable light chain  | OM729264 |
| VL_5_B3 variable light chain  | OM729265 |
| VL_5_B4 variable light chain  | OM729266 |
| VL_5_B5 variable light chain  | OM729267 |
| VL_5_B8 variable light chain  | OM729268 |
| VL_5_B9 variable light chain  | OM729269 |
| VL_5_B12 variable light chain | OM729270 |
| VL_5_C1 variable light chain  | OM729271 |
| VL_5_C2 variable light chain  | OM729272 |
| VL_5_C3 variable light chain  | OM729273 |
| VL_5_C4 variable light chain  | OM729274 |
| VL_5_C6 variable light chain  | OM729275 |
| VL_5_C8 variable light chain  | OM729276 |
| VL_5_C9 variable light chain  | OM729277 |
| VL_5_C11 variable light chain | OM729278 |
| VL_5_D1 variable light chain  | OM729279 |
| VL_5_D3 variable light chain  | OM729280 |
| VL_5_D4 variable light chain  | OM729281 |
| VL_5_D6 variable light chain  | OM729282 |
| VL_5_D7 variable light chain  | OM729283 |
| VL_5_D8 variable light chain  | OM729284 |
| VL_5_D9 variable light chain  | OM729285 |
| VL_5_D11 variable light chain | OM729286 |
| VL_5_D12 variable light chain | OM729287 |
| VL_5_E1 variable light chain  | OM729288 |
| VL_5_E3 variable light chain  | OM729289 |
| VL_5_E5 variable light chain  | OM729290 |
| VL_5_E6 variable light chain  | OM729291 |
| VL_5_E7 variable light chain  | OM729292 |
| VL_5_E9 variable light chain  | OM729293 |
| VL_5_E10 variable light chain | OM729294 |
| VL_5_E11 variable light chain | OM729295 |
| VL_5_E12 variable light chain | OM729296 |
| VL_5_F1 variable light chain  | OM729297 |
| VL_5_F2 variable light chain  | OM729298 |
| VL_5_F3 variable light chain  | OM729299 |
| VL_5_F5 variable light chain  | OM729300 |
| VL_5_F6 variable light chain  | OM729301 |
| VL_5_F8 variable light chain  | OM729302 |
| VL_5_F10 variable light chain | OM729303 |
| VL_5_F12 variable light chain | OM729304 |
| VL_5_G1 variable light chain  | OM729305 |
| VL_5_G2 variable light chain  | OM729306 |
| VL_5_G3 variable light chain  | OM729307 |
| VL_5_G4 variable light chain  | OM729308 |
| VL_5_G5 variable light chain  | OM729309 |



|                               |          |
|-------------------------------|----------|
| VL_5_G6 variable light chain  | OM729310 |
| VL_5_G7 variable light chain  | OM729311 |
| VL_5_G9 variable light chain  | OM729312 |
| VL_5_G10 variable light chain | OM729313 |
| VL_5_G12 variable light chain | OM729314 |
| VL_5_H1 variable light chain  | OM729315 |
| VL_5_H4 variable light chain  | OM729316 |
| VL_5_H6 variable light chain  | OM729317 |
| VL_5_H8 variable light chain  | OM729318 |
| VL_5_H11 variable light chain | OM729319 |

**Table S4** (related to **STAR Methods**). **Murine B cell receptor sequence accession numbers.**  
Genbank accession numbers for B cell receptor sequences.
