# Supplementary material
Source: PubMed Central journal article supplement (PMC8898741)
Supplement: mmc2.pdf [file mmc2.pdf]

# Rationally designed immunogens enable immune focusing following SARS-CoV-2 spike imprinting

## Graphical abstract

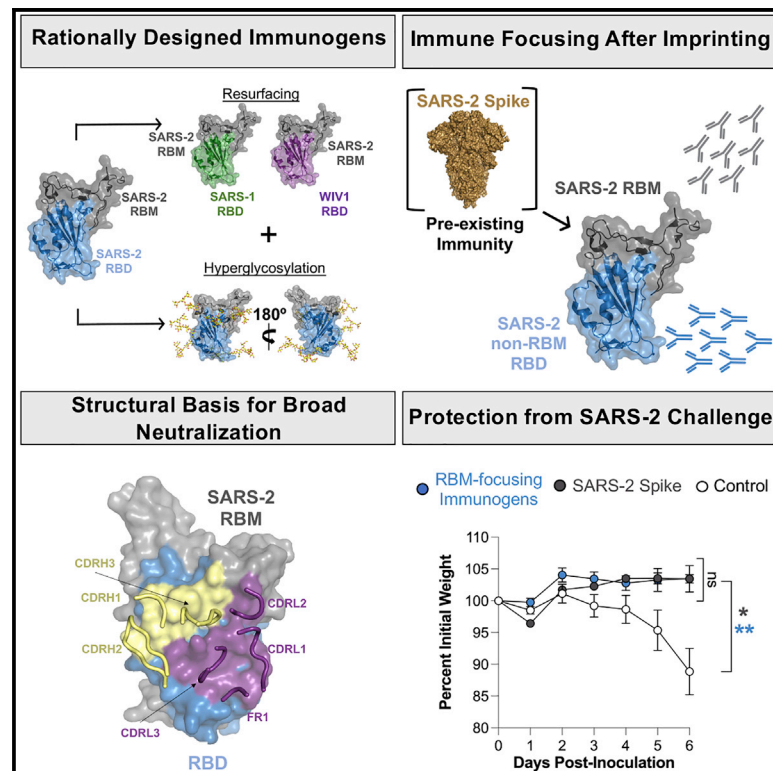

## Authors

Blake M. Hauser, Maya Sangesland, Kerri J. St. Denis, ..., Alejandro B. Balazs, Daniel Lingwood, Aaron G. Schmidt

## Correspondence

aschmidt@crystal.harvard.edu

## In brief

Hauser et al. use structure-guided design to engineer SARS-CoV-2 immunogens that direct immune responses to conserved viral sites in the context of preexisting immunity. In mice, these immunogens elicit antibodies that potentially neutralize related coronaviruses, including those of potential pandemic concern. Structural characterization of selected antibodies explains this observation.

## Highlights

- Rationally designed immunogens using glycan engineering and epitope scaffolding
- Immunogens focus murine antibody responses following SARS-CoV-2 spike imprinting
- Focusing to the SARS-CoV-2 receptor binding motif yields broad, potent neutralization
- Structural characterization of immunogen-elicited mAbs defines conserved epitopes

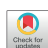

## Article

# Rationally designed immunogens enable immune focusing following SARS-CoV-2 spike imprinting

Blake M. Hauser,<sup>1</sup> Maya Sangesland,<sup>1</sup> Kerri J. St. Denis,<sup>1</sup> Evan C. Lam,<sup>1</sup> James Brett Case,<sup>2</sup> Ian W. Windsor,<sup>1,3,4</sup> Jared Feldman,<sup>1</sup> Timothy M. Caradonna,<sup>1</sup> Ty Kannegieter,<sup>1</sup> Michael S. Diamond,<sup>2,5,6</sup> Alejandro B. Balazs,<sup>1</sup> Daniel Lingwood,<sup>1</sup> and Aaron G. Schmidt<sup>1,7,8,\*</sup>

<sup>1</sup>Ragon Institute of MGH, MIT, and Harvard, Cambridge, MA 02139, USA

<sup>2</sup>Department of Medicine, Washington University School of Medicine, St. Louis, MO 63110, USA

<sup>3</sup>Department of Biological Chemistry and Molecular Pharmacology, Harvard Medical School, Boston, MA 02115, USA

<sup>4</sup>Laboratory of Molecular Medicine, Boston Children's Hospital, Boston, MA 02115, USA

<sup>5</sup>Department of Molecular Microbiology, Washington University School of Medicine, St. Louis, MO 63110, USA

<sup>6</sup>Department of Pathology & Immunology, Washington University School of Medicine, St. Louis, MO 63110, USA

<sup>7</sup>Department of Microbiology, Harvard Medical School, Boston, MA 02115, USA

<sup>8</sup>Lead contact

\*Correspondence: [aschmidt@crystal.harvard.edu](mailto:aschmidt@crystal.harvard.edu)

<https://doi.org/10.1016/j.celrep.2022.110561>

## SUMMARY

Eliciting antibodies to surface-exposed viral glycoproteins can generate protective responses that control and prevent future infections. Targeting conserved sites may reduce the likelihood of viral escape and limit the spread of related viruses with pandemic potential. Here we leverage rational immunogen design to focus humoral responses on conserved epitopes. Using glycan engineering and epitope scaffolding in boosting immunogens, we focus murine serum antibody responses to conserved receptor binding motif (RBM) and receptor binding domain (RBD) epitopes following severe acute respiratory syndrome coronavirus 2 (SARS-CoV-2) spike imprinting. Although all engineered immunogens elicit a robust SARS-CoV-2-neutralizing serum response, RBM-focusing immunogens exhibit increased potency against related sarbecoviruses, SARS-CoV, WIV1-CoV, RaTG13-CoV, and SHC014-CoV; structural characterization of representative antibodies defines a conserved epitope. RBM-focused sera confer protection against SARS-CoV-2 challenge. Thus, RBM focusing is a promising strategy to elicit breadth across emerging sarbecoviruses without compromising SARS-CoV-2 protection. These engineering strategies are adaptable to other viral glycoproteins for targeting conserved epitopes.

## INTRODUCTION

The emergence of severe acute respiratory syndrome coronavirus 2 (SARS-CoV-2; SARS-2) and the subsequent global pandemic have highlighted the disruptive threat posed by viruses for which humans have no prior immunity. Rapid vaccine development has led to an unprecedented number of candidates. Although differing in platform (e.g., mRNA, adenovirus, nanoparticle), the primary immunogen is the SARS-2 spike ectodomain (Amanat and Krammer, 2020). With the continued global spread of SARS-2 in conjunction with potential vaccinations, it is likely that a large proportion of the global population will eventually develop an immune response to SARS-2. However, even after potentially achieving herd immunity sufficient to slow its spread, SARS-2 evolution leading to variants that escape immunity as well as emerging novel coronaviruses with pandemic potential remain a concern. Elicited immunity to SARS-2 infection may not protect against emergent novel coronaviruses that are

closely related to SARS-2 as well as SARS-2 variants (Chen et al., 2021; Garcia-Beltran et al., 2021a, 2021b; Martinez et al., 2021; Planas et al., 2021; Supasa et al., 2021; Wibmer et al., 2021; Zhou et al., 2021). It is therefore critical to develop vaccines that confer potential pan-coronavirus immunity.

Although we cannot readily predict which novel coronaviruses or SARS-2 variants will emerge, the coronavirus spike glycoprotein contains conserved sites that can be targeted proactively, leading to potentially broad immunity. A potential site is the angiotensin-converting enzyme 2 (ACE2) receptor binding motif (RBM) of the receptor binding domain (RBD) (Barnes et al., 2020; Ju et al., 2020; Piccoli et al., 2020). Several potentially neutralizing RBM-directed antibodies that interfere with ACE2 binding are protective, and some can also neutralize related coronaviruses from the same sarbecovirus subgenus (Barnes et al., 2020; Hansen et al., 2020; Rappazzo et al., 2021; Wec et al., 2020; Wu et al., 2020b). Although the RBM does contain some broadly conserved epitopes, large portions vary between related

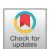

sarbecoviruses (Rappazzo et al., 2021; Wec et al., 2020). Other conserved sites include RBD epitopes outside of the RBM that show remarkable conservation across the sarbecovirus subgenus and currently circulating SARS-2 variants; some antibodies that bind to these epitopes can also confer broad neutralization (Garcia-Beltran et al., 2021b; Pinto et al., 2020; Yuan et al., 2020). Thus, implementing rational design strategies aimed at directing the immune response to these conserved sites may reduce the likelihood of viral escape and lead to more broadly protective responses (He et al., 2021; Martinez et al., 2022; Pinto et al., 2020; Rappazzo et al., 2021; Wec et al., 2020).

Immunogen design approaches that can be leveraged to direct humoral immune responses include “masking” epitopes via engineering putative N-linked glycosylation (PNG) sites and epitope “scaffolding” to selectively present broadly protective epitopes (Bajic et al., 2019, 2020); these strategies have been used previously for the viral glycoproteins respiratory syncytial virus (RSV) F, influenza hemagglutinin, and HIV envelope proteins (Correia et al., 2014; Crispin et al., 2018; Ofek et al., 2010). Applying these approaches to the SARS-2 spike provides an opportunity to potentially improve serum neutralization potency, efficacy against variants, and cross-reactivity of antibody responses. Multimerized versions of the RBDs of several coronaviruses are potent immunogens (Cohen et al., 2021; Dai et al., 2020; Kang et al., 2021; Li et al., 2021; Ma et al., 2020; Saunders et al., 2021; Shinnakasu et al., 2021; Walls et al., 2020; Wang et al., 2021a). However, these engineered immunogens have only been tested as single immunization regimens or homologous prime/boost regimens in SARS-2-naïve animals.

SARS-2 spike-based boosters are now recommended for some mRNA vaccine recipients (Haufe et al., 2021), and clinical trials of heterologous boosters with different SARS-2 variants are underway (e.g., [ClinicalTrials.gov](https://clinicaltrials.gov/ct2/show/study/NCT04889209): NCT04889209 and NCT04713553). SARS-2 imprinting via infection or prior immunization therefore merits consideration as boosting immunizations are evaluated. The immunological effect of imprinting is especially notable in influenza re-infection or immunization, in which the antibody response often remains biased toward the influenza strain to which a human or model organism first developed humoral immunity; this “antigenic sin” can be detrimental to protection against influenza strains that are antigenically distinct from the imprinting strain (de St Groth and Webster, 1966; Jensen et al., 1956; Webster, 1966).

Here, we designed protein-based immunogens that used hyperglycosylation of the RBD and a “resurfacing” approach that grafts the RBM from SARS-2 onto heterologous coronavirus-based RBD scaffolds. We boosted with these immunogens to refocus the immune response in the context of SARS-2 spike imprinting. We immunized mice that were primed with SARS-2 spike as a surrogate for pre-existing immunity imprinted by vaccination or natural infection. We found that boosting with different regimens containing our engineered immunogens could selectively focus serum responses to the RBM or non-RBM epitopes. Importantly, even the RBM-focused response targets broadly conserved epitopes on related sarbecovirus RBDs. We isolated and structurally characterized antibodies targeting conserved and SARS-2-specific RBM epitopes, including a class of antibodies with broad sarbecovirus neutralization activ-

ity. The RBM-directed, immune-focused response is potently neutralizing, with breadth across SARS-2 variants and other coronaviruses without compromising SARS-2 neutralization or protection. Our data show how rationally designed immunogens can redirect immune responses to conserved coronavirus epitopes in the context of pre-existing immunity. These results could inform next-generation coronavirus vaccines.

## RESULTS

### Epitope grafting of the SARS-2 RBM onto heterologous coronavirus scaffolds

The RBM of SARS-2 and the related sarbecoviruses SARS-CoV (SARS-1) and WIV1-CoV (WIV1) is a contiguous sequence spanning residues 437–508 (SARS-2 numbering) of the spike protein. To elicit RBM-specific responses only, we first evaluated whether the RBM itself could be expressed recombinantly in the absence of the rest of the RBD (Figure S1A). Although the SARS-2 RBM could indeed be expressed, it failed to engage the conformation-specific RBM-directed antibody B38 or bind to cell-surface-expressed ACE2 (Figure S1B). These results suggest that the RBM is conformationally flexible and that the RBD serves as a structural “scaffold” to stabilize the RBM in its binding-compatible conformation.

To circumvent the hurdle of *de novo* scaffold design to present the RBM, we tested whether heterologous sarbecovirus RBDs from SARS-1 and WIV1 and the more distantly related merbecovirus MERS-CoV (Middle East respiratory syndrome; MERS) could serve as scaffolds (Figure 1A); variations of this approach have been used previously to modulate ACE2 binding properties (Letko et al., 2020; Shang et al., 2020). The SARS-1, WIV1, and MERS RBDs share a pairwise amino acid identity with SARS-2 of 73.0%, 75.4%, and 19.5%, respectively. Despite both using ACE2 as a receptor, the RBM is less conserved for SARS-1 and WIV1, with only 49.3% and 52.1% identity, respectively; because MERS uses DPP4 as a receptor, its RBM shares no notable identity (Raj et al., 2013). Although we were unable to “resurface” the MERS RBD with the SARS-2 RBM, the related SARS-1 and WIV1 RBDs successfully accepted the RBM transfer. These resurfaced (rs) constructs, rsSARS-1 and rsWIV1, retained binding to the SARS-2 RBM-specific B38 antibody and efficiently engaged ACE2 (Figure S1C; Wu et al., 2020b). These data suggest that there are sequence and structural constraints within the RBD required for successful RBM grafting; such an approach may be facilitated by using CoV RBDs that use the same receptor for viral entry.

### Engineered glycans for epitope focusing

We next used these rsRBDs as templates for further modification using glycan engineering. This approach aimed to mask conserved, cross-reactive epitopes shared between the SARS-1, SARS-2, and WIV1 RBDs to further enhance potential immune focusing to the RBM. There are two evolutionarily conserved putative N-linked glycosylation sites (PNGs) at positions 331 and 343; SARS-1 and WIV1 have an additional conserved PNG at position 370 (SARS-2 numbering). To increase overall surface glycan density, we introduced novel PNGs onto wild-type SARS-2 as well as rsSARS-1 and rsWIV1 RBDs. Based on

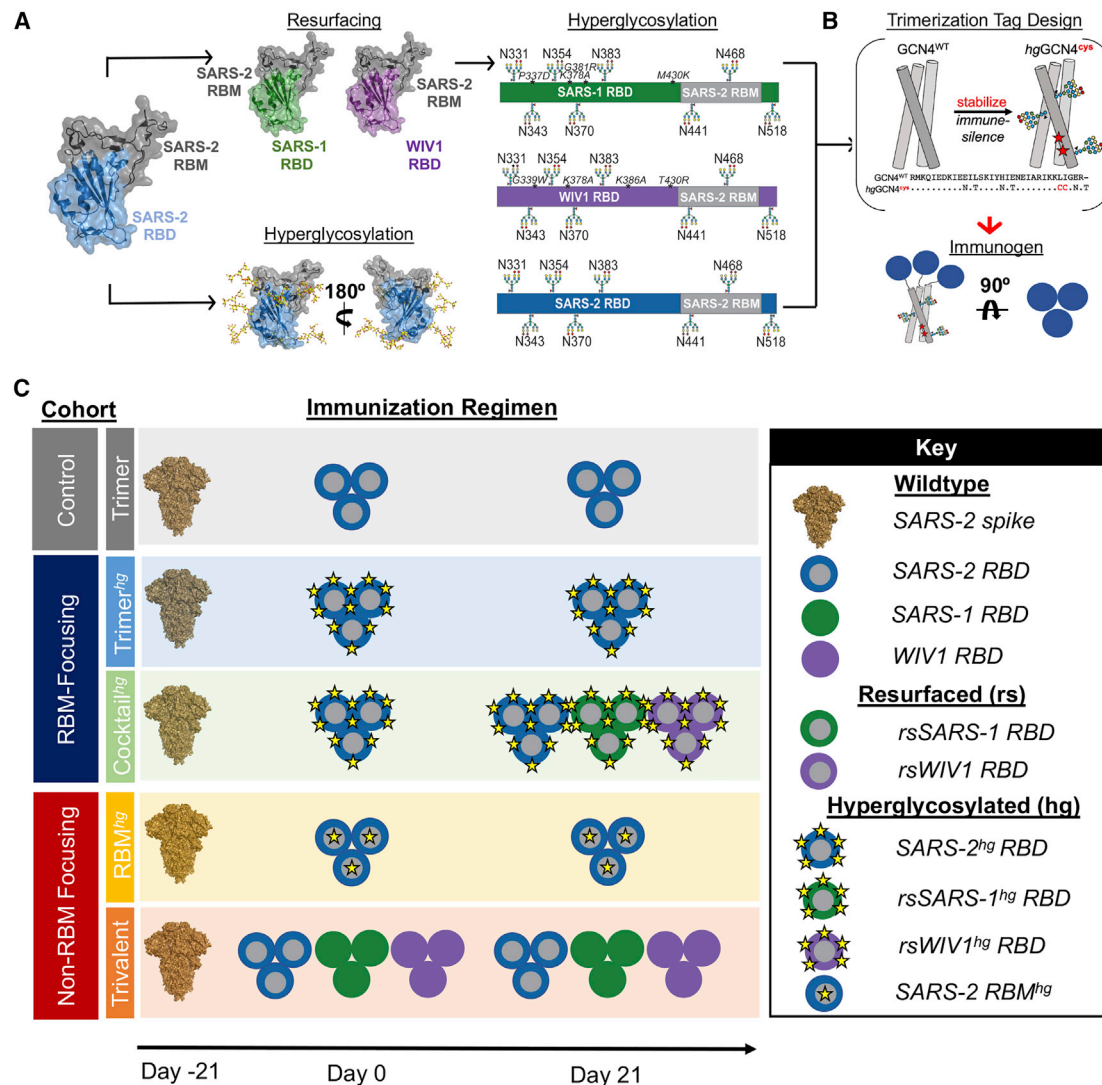

**Figure 1. Resurfacing and hyperglycosylation approaches for immune focusing**

(A) Design schematics for resurfacing SARS-1 (rsSARS-1) and WIV1 (rsWIV1) scaffolds with the SARS-2 receptor binding motif (RBM) and for hyperglycosylating SARS-2 (SARS-2<sup>hg</sup>), rsSARS-1 (rsSARS-1<sup>hg</sup>), and rsWIV1 (rsWIV1<sup>hg</sup>) receptor binding domains (RBDs). Non-native engineered glycans and native glycans are modeled; native SARS-2 RBD glycan at position 331 is omitted in the schematic. Although glycans at positions 441 and 468 technically fall within the RBM, they are on the sides of the RBD, as shown in the model. Mutations in the WIV1 and SARS-1 RBDs are shown in red and italicized in the linear diagram. All images were created using PDB: 6M0J.

(B) Design schematic for generating RBD trimers appended onto a cystine-stabilized (red stars) hyperglycosylated GCN4 tag (PDB: 6VSB).

(C) Schematic of immunization cohorts. The Trimer, Trimer<sup>hg</sup>, and Cocktail<sup>hg</sup> cohorts each contained 10 mice, and the Trivalent and RBM<sup>hg</sup> cohorts each contained 5 mice.

See also [Figures S1](#) and [S2](#).

structural modeling and further biochemical validation, we identified 5 additional sites on rsSARS-1 and rsWIV1 and 6 on SARS-2. Including the native PNGs, all constructs had a total of 8 glycans ([Figures 1A](#) and [S1D–S1G](#)); we denote these hyperglycosylated (hg) constructs as SARS-2<sup>hg</sup>, rsSARS-1<sup>hg</sup>, and rsWIV1<sup>hg</sup>. We expressed these constructs in mammalian cells to ensure complex, heterogeneous glycosylation to maximize the glycan “shielding” effect. We subsequently characterized these constructs using the RBM-directed antibody B38, as well as ACE2 binding, to ensure that the engineered PNGs did not adversely

affect the RBM conformation. The hyperglycosylated constructs were largely comparable in affinity for B38, with only an ~2-fold decrease, and still effectively engaged ACE2 ([Figure S1G](#)). These results confirm a conformationally and functionally intact RBM.

Next we assessed whether the engineered PNGs abrogated binding to the sarbecovirus cross-reactive antibodies S309 and CR3022, which engage epitopes outside of the RBM ([Pinto et al., 2020](#); [Yuan et al., 2020](#)). The CR3022 epitope between SARS-1 and WIV1 differs at only a single residue, whereas SARS-2 differs at 5 residues across the CR3022 and S309

epitopes (Wu et al., 2020a). Importantly, these epitope regions comprise a considerable portion of the non-RBM SARS-2 RBD, and, thus, any RBM focusing would require masking of these regions (Barnes et al., 2020; Pinto et al., 2020; Yuan et al., 2020). Although SARS-2<sup>hg</sup> effectively abrogated S309 and CR3022 binding, the engineered PNGs at the antibody:antigen interface on rsSARS-1<sup>hg</sup> and rsWIV1<sup>hg</sup> did not completely abrogate S309 and CR3022 binding. We therefore incorporated unique mutations on rsSARS-1<sup>hg</sup> and rsWIV1<sup>hg</sup> so that any potentially elicited antibodies would be less likely to cross-react between these two constructs. We found that K378A and the engineered glycan at residue 383 (SARS-2 numbering) abrogated CR3022 binding in rsSARS-1<sup>hg</sup> and rsWIV1<sup>hg</sup> (Figure S1F). For S309, mutation P337D in rsSARS-1<sup>hg</sup> and G339W in rsWIV1<sup>hg</sup>, in addition to glycans at residues 441 and 354 (SARS-2 numbering), were sufficient to disrupt binding (Figure S1F). We made two additional mutations, G381R, M430K on rsSARS-1<sup>hg</sup> and K386A, T430R on rsWIV1<sup>hg</sup>, to increase the antigenic distance between these scaffolds (Figure 1A).

Last, we wanted to determine whether hyperglycosylation could similarly focus the humoral immune response to non-RBM epitopes. We therefore engineered four novel glycans at positions 448, 475, 494, and 501 on the RBM of the wild-type SARS-2 RBD (RBM<sup>hg</sup>) (Figures S2A and S2B). The engineered PNGs effectively abrogate RBM-directed B38 antibody binding and engagement of ACE2 (Figure S2C). Because the engineered PNGs restrict binding of RBM-directed antibodies, this construct can also be used to assess RBM focusing compared with the wild-type SARS-2 RBD.

### Design of a non-immunogenic trimerization tag for enhanced avidity

To increase avidity of our engineered immunogens while minimizing any off-target tag-specific responses, we designed a cysteine-stabilized and hyperglycosylated variant of a GCN4 trimerization tag (hgGCN4<sup>cys</sup>) (Figure 1B; Slieden et al., 2015). Although the two cysteines are within one subunit, they form an intermolecular disulfide with an adjacent subunit, allowing the RBDs to remain trimerized, whereas the tag is “immune silent.” We recombinantly expressed the engineered immunogens and wild-type RBD trimers in mammalian cells; the oligomeric state was confirmed using SDS-PAGE analysis under non-reducing conditions (Figures S2D–S2F). Antigenicity was assayed using Fab fragments of the conformation-specific antibodies CR3022 and/or B38 using biolayer interferometry; the RBD trimers had monovalent affinities comparable with the RBD monomers (Figure S2G). We also used the hgGCN4<sup>cys</sup> tag for the engineered hyperglycosylated and resurfaced immunogens (Figures S2H–S2J).

### Cohorts and immunization regimens

We tested the immunogenicity and antigenicity of our designs and assessed their RBM and non-RBM immune-focusing properties in wild-type C57BL/6 mice (Figure 1C). Cohorts are color-coded in Figure 1C, and the same color coding is used throughout all subsequent figures. All cohorts were primed with SARS-2 spike to reflect pre-existing SARS-2 immunity. All protein immunizations were adjuvanted with Sigma adjuvant. The control cohort was boosted with wild-type (i.e., unmodified)

SARS-2 RBD trimer (Figure 1C, Trimer cohort, gray). We divided our immune-focusing cohorts into RBM and non-RBM centered. For RBM immune-focusing, one cohort was boosted with SARS-2<sup>hg</sup> trimers (Figure 1C, Trimer<sup>hg</sup> cohort, light blue), and a second cohort was boosted first with SARS-2<sup>hg</sup> trimers followed by a second boost with a cocktail of rsSARS-1<sup>hg</sup> and rsWIV1<sup>hg</sup> (Figure 1C, Cocktail<sup>hg</sup> cohort, light green). For non-RBM immune focusing, one cohort was boosted with RBM<sup>hg</sup> trimers (Figure 1C, RBM<sup>hg</sup>, yellow), and a second was boosted with a cocktail of wild-type SARS-1, SARS-2, and WIV1 RBD trimers (Figure 1C, Trivalent cohort, orange).

The Trimer<sup>hg</sup> and RBM<sup>hg</sup> cohorts described above use hyperglycosylation as an immune focusing strategy, whereas the Cocktail<sup>hg</sup> cohort combines hyperglycosylation and resurfacing to enhance immune focusing to the RBM by reducing the prevalence of any non-RBM epitopes. The Trivalent cohort preferentially displays the conserved RBM across the wild-type SARS-2, SARS-1, and WIV1 RBDs; the majority of this conserved surface area falls outside of the RBM (Figure S2K).

### Immune focusing of serum responses in the context of SARS-2 spike imprinting

Across all cohorts, we observed a robust serum response to the wild-type SARS-2 RBD (Figures 2A and S3A–S3E) with minimal tag-directed responses (Figure S3F). To specifically assess RBM-directed responses, we compared serum ELISA titers with the wild-type SARS-2 RBD and our SARS-2 RBM<sup>hg</sup> RBD construct; the latter has glycans that occlude the RBM. The Trimer<sup>hg</sup> and Cocktail<sup>hg</sup> cohorts had a significant increase in serum antibody titers to the wild-type SARS-2 RBD relative to the SARS-2 RBM<sup>hg</sup> RBD; this contrasted with the Trimer, RBM<sup>hg</sup>, and Trivalent cohorts, for which this difference was not statistically significant (Figure 2A). For all mice, the titers to the SARS-2 RBM<sup>hg</sup> construct were lower than those to the wild-type SARS-2 RBD. Across the Trimer<sup>hg</sup> and Cocktail<sup>hg</sup> cohorts, the mean endpoint titer reduction to the SARS-2 RBM<sup>hg</sup> RBD relative to the wild-type SARS-2 RBD was ~64%, which reflects a total or partial loss of affinity from antibodies because of steric interference by the RBM<sup>hg</sup> engineered glycans. The Cocktail<sup>hg</sup> cohort had a modest increase in RBM focusing relative to the Trimer<sup>hg</sup> cohort. This may be due to increasing the overall antigenic distance (i.e., sequence difference) between the WIV1 and SARS-1 RBDs relative to SARS-2 while maintaining the identical SARS-2 RBM epitope. We find that the Trimer<sup>hg</sup> and Cocktail<sup>hg</sup> cohorts had significantly lower titers to the SARS-1 and WIV1 RBDs than to the SARS-2 RBD (Figures S3B and S3C). This difference was most pronounced in the Cocktail<sup>hg</sup> cohort, suggesting that the hyperglycosylation and engineered mutations within the RBD dampened responses to conserved, cross-reactive epitopes present outside the RBM. Serum titers against the rsSARS-1 and rsWIV1 RBDs were comparable with the SARS-2 RBD, indicating that there is a minimal antibody response directed toward the wild-type SARS-1 and WIV1 RBD epitopes in comparison with the SARS-2 RBM (Figure 2B). We observed no significant glycan-dependent serum response in the Trimer<sup>hg</sup> or Cocktail<sup>hg</sup> cohort (Figure S3G). These data confirm an enhanced SARS-2 RBM-focused serum response elicited by our engineered immunogens.

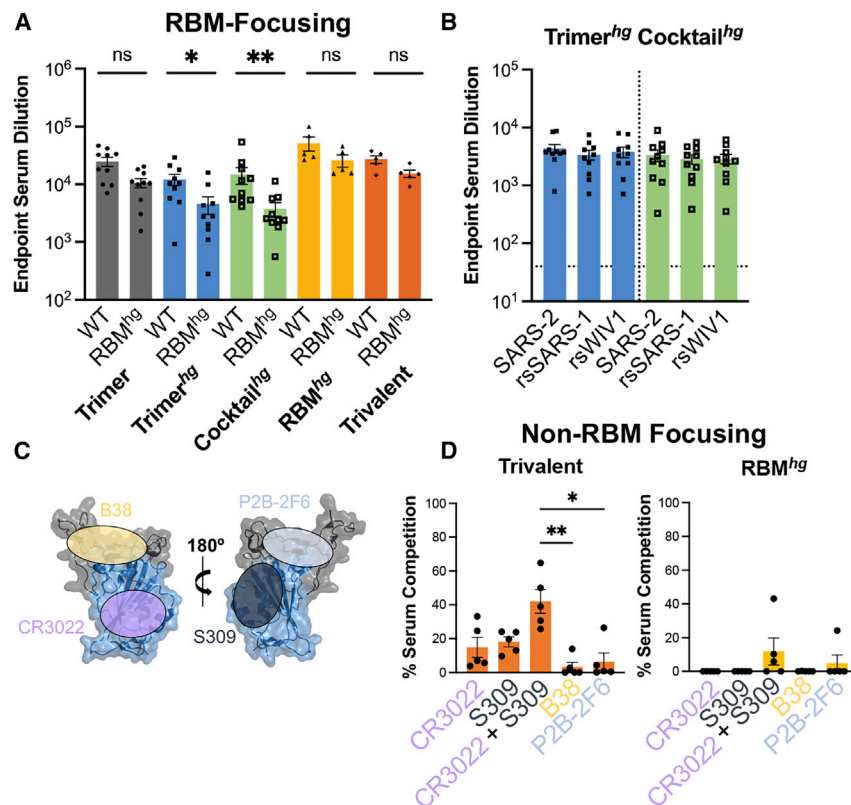

**Figure 2. Assessing SARS-2 RBD immune focusing via serum analysis from cohorts**

(A) Serum following immunizations was assayed by ELISA on day 35 with the wild-type SARS-2 RBD and RBM<sup>hg</sup>. Statistical significance was determined using a Mann-Whitney *U* test (\**p* < 0.05, \*\**p* < 0.01). Bars represent mean ± SE.

(B) Day 35 serum samples from the Trimer<sup>hg</sup> and Cocktail<sup>hg</sup> cohorts showed significantly less binding to the SARS-1 and WIV1 RBDs compared with the SARS-2 RBD (Figures S3B and S3C). However, when assayed against rsSARS-1 and rsWIV1 RBDs, these sera no longer show statistically significant differences in binding compared with the SARS-2 RBD, as determined using a Kruskal-Wallis test with post hoc analysis using Dunn's test corrected for multiple comparisons. Bars represent mean ± SE.

(C) Approximate locations of representative Ab epitopes from each of the four SARS-2 RBD-directed Ab classes (Barnes et al., 2020; PDB: 6M0J).

(D) Percent competition in ELISAs using day 35 mouse sera in the presence of competing IgGs versus a no-IgG control. SARS-2 RBD was the coating antigen. Statistical significance was determined using a Kruskal-Wallis test with post hoc analysis using Dunn's test corrected for multiple comparisons, and pairwise comparisons pictured without bars were not significant (\**p* < 0.05, \*\**p* < 0.01, \*\*\**p* < 0.001); ns, not significant. See also Figure S3.

To determine whether the RBM<sup>hg</sup> and Trivalent cohorts successfully directed the immune response to non-RBM epitopes on the RBD, we performed serum competition by incubating RBD-coated ELISA plates with B38, P2B-2F6, CR3022, and S309 immunoglobulin G (IgG), representing each of the four previously defined “classes” of SARS-2 RBD epitopes (Figure 2C; Barnes et al., 2020). Indeed, the previously characterized CR3022 and S309 antibodies have footprints that together cover much of the conserved non-RBM region of the RBD, with buried surface area (BSA) of 917 Å<sup>2</sup> and 795 Å<sup>2</sup>, respectively, in comparison with a BSA of 869 Å<sup>2</sup> for ACE2 (Lan et al., 2020; Pinto et al., 2020; Yuan et al., 2020). We then assessed binding of mouse serum IgG (Figure 2D). Only the Trivalent cohort showed a significant increase in serum competition when the CR3022 and S309 IgGs were combined, suggesting that only this regimen could effectively focus on conserved non-RBM epitopes on the SARS-2 RBD.

### Immunogen-elicited RBM-focused antibody responses potently neutralize sarbecoviruses

We next compared the neutralization potency (i.e., neutralization per unit of antigen-specific IgG) of all cohorts using SARS-1, SARS-2, WIV1, RaTG13-CoV (RaTG13), and SHC014-CoV (SHC014) pseudoviruses (Crawford et al., 2020; Garcia-Beltran et al., 2021a; Menachery et al., 2015; Shang et al., 2020). WIV1, RaTG13, and SHC014, in this instance, are broadly representative of possible future emerging sarbecoviruses with pandemic potential (Menachery

et al., 2015, 2016; Shang et al., 2020). All cohorts elicited a potent SARS-2 neutralizing response. The RBM-focusing Trimer<sup>hg</sup> and Cocktail<sup>hg</sup> cohorts elicited a significantly more potent neutralizing response than the non-RBM focusing RBM<sup>hg</sup> and Trivalent cohorts. The Trimer<sup>hg</sup> and Cocktail<sup>hg</sup> cohorts also neutralized SARS-1-, WIV1-, RaTG13-, and SHC014-expressing pseudoviruses relative to the Trimer, RBM<sup>hg</sup>, and Trivalent cohorts (Figures 3A, S3A–S3E, and S3H). This is noteworthy for the Trimer<sup>hg</sup> cohort because it did not include any of these RBDs in the immunization regimen. Similarly, the Cocktail<sup>hg</sup> cohort neutralized RaTG13 and SHC014, neither of which was present in the immunogen. In contrast, the Trimer cohort was less potently neutralizing against RaTG13, SARS-1, WIV1, and SHC014, and the RBM<sup>hg</sup> cohort trended toward a loss in neutralization as well (Figures S4A and S4B). The Trivalent cohort also failed to neutralize SARS-1 and trended toward a loss against RaTG13, WIV1, and SHC014. Immune imprinting by priming with SARS-2 spike in the Trivalent cohort appears to have biased the subsequent serum antibody response, which shows significantly greater neutralization of SARS-2 compared with SARS-1 and WIV1 despite inclusion of all three components in the boosting immunizations. The neutralization patterns observed for the Trimer, RBM<sup>hg</sup>, and Trivalent cohorts are similar to those in humans and mice after SARS-2 infection or vaccination, in which sera show markedly reduced neutralization against related sarbecoviruses compared with SARS-2 (Garcia-Beltran et al., 2021a, 2021b; He et al., 2021).

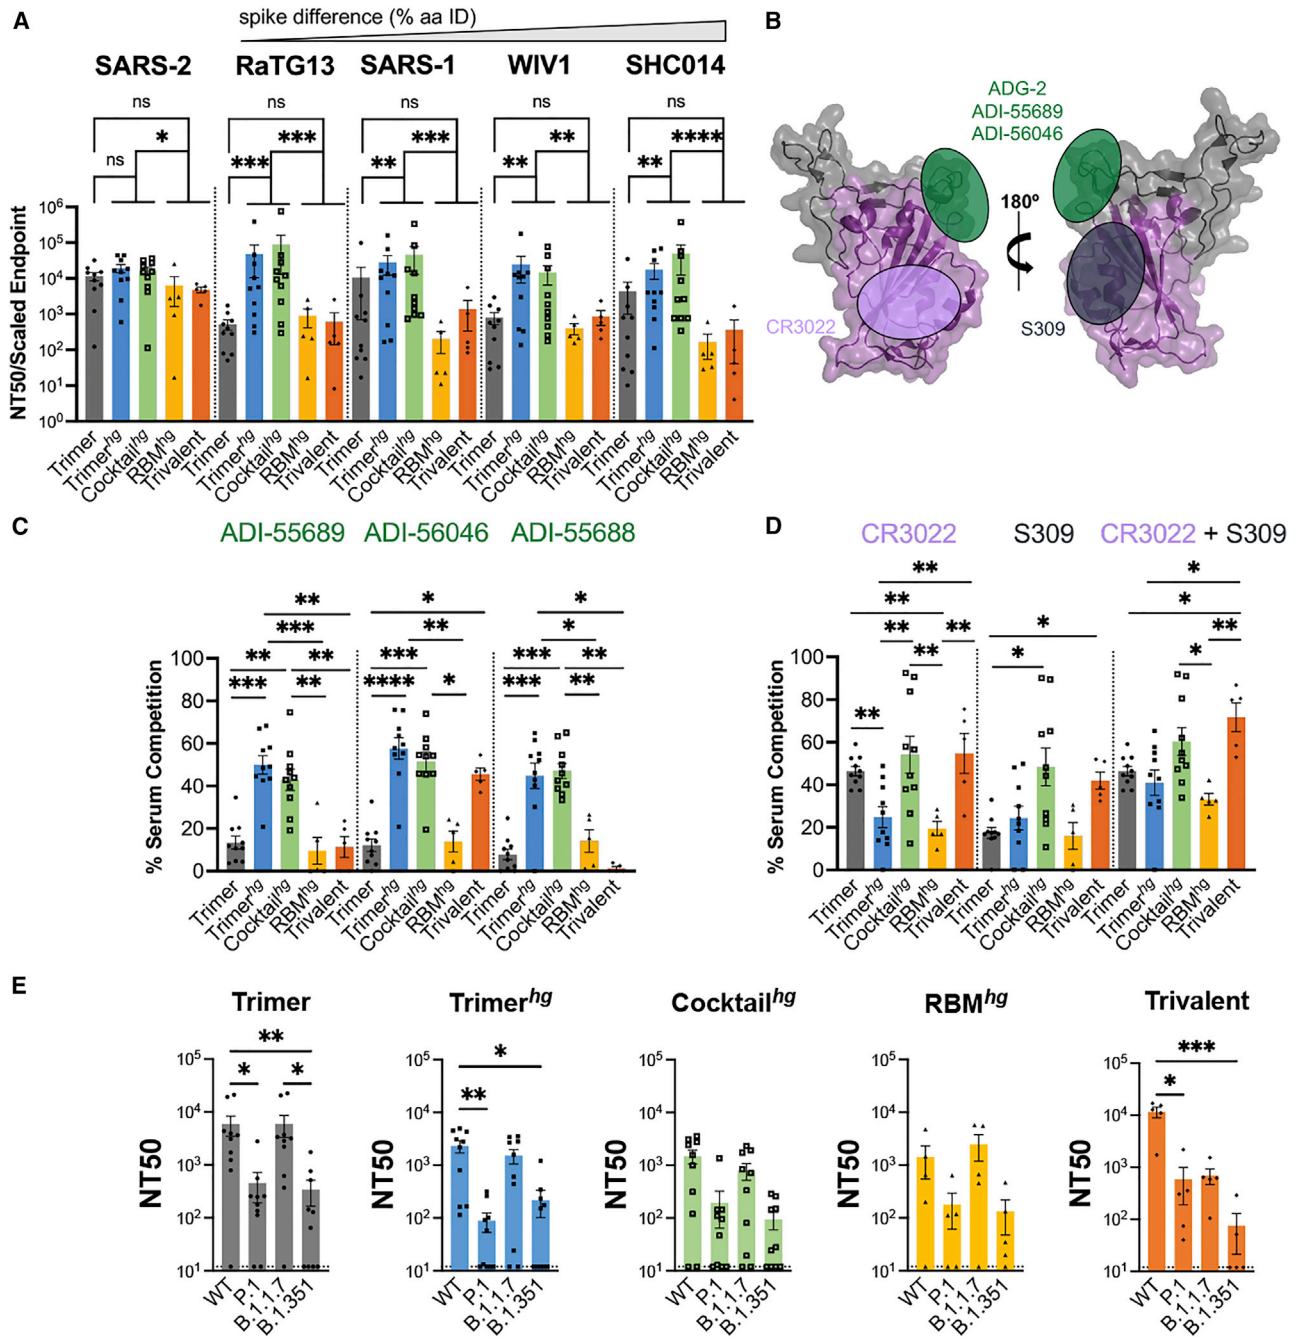

**Figure 3. Potency and characterization of the SARS-like coronavirus neutralization response**

(A) Day 35 serum from all mice was assayed for neutralization against SARS-2, RaTG13, SARS-1, WIV1, and SHC014 pseudoviruses (arranged in order of genetic similarity of the full-length spike to SARS-2). Neutralization potency was computed using scaled endpoint serum ELISA titers. Statistical significance was determined using a Kruskal-Wallis test with post hoc analysis using Dunn's test corrected for multiple comparisons (\* $p < 0.05$ , \*\* $p < 0.01$ , \*\*\* $p < 0.001$ , \*\*\*\* $p < 0.0001$ ). Bars represent mean  $\pm$  SE.

(B) Approximate locations of representative Ab epitopes from the two non-RBM-directed SARS-2 RBD-directed Ab classes (Barnes et al., 2020) and ADG-2-like Abs on the WIV1 RBD (PDB: 6M0J).

(C and D) Ab competition ELISAs with WIV1 RBD as the coating antigen. Bars show the mean percent binding lost, with error bars representing the standard error of the mean. Comparisons were performed using a Kruskal-Wallis test with post hoc analysis using Dunn's test corrected for multiple comparisons, and pairwise comparisons pictured without bars were not significant (\* $p < 0.05$ , \*\* $p < 0.01$ , \*\*\* $p < 0.001$ , \*\*\*\* $p < 0.0001$ ). Bars represent mean  $\pm$  SE.

(legend continued on next page)

### Receptor-binding-motif-focused antibody responses target a broadly conserved epitope

To epitope map cross-reactive, RBM-focused serum responses, we performed ELISA-based antibody competition using the cross-reactive antibodies CR3022, S309, ADI-55688, ADI-55689, and ADI-56046 with the WIV1 RBD (Figures 3B–3D). The latter three antibodies bind a conserved sarbecovirus RBM epitope also targeted by the antibody ADG-2, which is currently in clinical development and for which ADI-55688 is a precursor, as well as other antibodies with broad sarbecovirus neutralization (Martinez et al., 2022; Rappazzo et al., 2021; Wec et al., 2020). Competition ELISAs, which we used to broadly bin serum antibody epitopes, suggest that the cross-reactive WIV1-directed responses in the Trimer<sup>hg</sup> and Cocktail<sup>hg</sup> cohorts focus to the ADG-2-like epitope as well as to the CR3022 and S309 epitopes in the Cocktail<sup>hg</sup> cohort (Figures 3C and 3D). Thus, SARS-2<sup>hg</sup>, rsSARS-1<sup>hg</sup>, and rsWIV1<sup>hg</sup> RBDs can not only induce potent SARS-2 neutralizing antibodies but also cross-reactive antibodies that bind to a conserved RBM epitope.

### Immune-focused responses neutralize variants of concern

Many SARS-2 variants of concern include mutations within the RBM, including B.1.1.7 (alpha), B.1.351 (beta), and P.1 (gamma), first detected in the United Kingdom, South Africa, and Brazil, respectively (Figure S4C). We evaluated how enhanced focusing to the RBM affected binding to these variants. Serum from the Cocktail<sup>hg</sup> cohort showed no significant loss of binding to the B.1.351 RBD compared with the wild-type SARS-2 RBD (Figure S4D). In contrast, the Trimer and Trimer<sup>hg</sup> cohorts had significant loss of binding; this parallels the observation of reduced serum binding from human subjects immunized with current SARS-2 vaccines (Chen et al., 2021; Garcia-Beltran et al., 2021b; Wang et al., 2021b; Zhou et al., 2021). The RBM<sup>hg</sup> and Trivalent cohorts showed no significant loss of binding, consistent with a non-RBM focused serum antibody response.

Additionally, we tested all cohort sera for neutralization against B.1.1.7-, B.1.351-, and P.1-expressing pseudoviruses. Although the Trimer and Trimer<sup>hg</sup> cohorts still neutralized all pseudoviruses to some degree, there was reduced neutralization of P.1 and B.1.351, consistent with our ELISA data. The Trivalent cohort also showed reduced neutralization of P.1 and B.1.351 despite maintaining binding to the B.1.351 RBD in ELISA. Although the Cocktail<sup>hg</sup> and RBM<sup>hg</sup> cohorts showed weaker neutralization of P.1 and B.1.351, this difference was not statistically significant (Figure 3E). Indeed, obscuring the RBM with glycans in our RBM<sup>hg</sup> cohort may have elicited neutralizing antibodies that are less sensitive to RBM mutations present in the variants, similar to other RBD-directed antibodies (e.g., CR3022/COVA1-16 and S309; Liu et al., 2020a; Pinto et al., 2020; Yuan et al., 2020). However, the RBM-directed elicited response from the Cocktail<sup>hg</sup> cohort still neutralized all variants. This may indicate that immune focusing to the RBM may allow

greater recognition (i.e., accommodation) of mutations compared with the RBM-directed antibody response elicited by natural infection or current vaccines (Yuan et al., 2021; Zhou et al., 2021).

### Additional multimerization does not improve SARS-2 neutralization or neutralization breadth

Nanoparticles are commonly used to enhance immunogenicity by increasing overall avidity (Dai et al., 2020); we therefore wanted to determine whether increasing the copy numbers of our engineered immunogens from 3 to 24 using ferritin-nanoparticles would improve overall immunogenicity and immune focusing. We covalently attached the SARS-2<sup>hg</sup> RBD to ferritin nanoparticles using SpyTag-SpyCatcher; this engineered RBD is the same as used in our Trimer<sup>hg</sup> cohort (Figure 4A; Zakeri et al., 2012). Using the same immunization regimen as in the Trimer<sup>hg</sup> cohort allowed direct comparison with antigenicity and immunogenicity because of valency. The nanoparticle immunogen did not elicit higher serum ELISA titers against the SARS-2 RBD (Figure S5A and S5B), maintained RBM-focusing (Figures 4B, 4C, and S5C) and had comparable SARS-2 pseudovirus neutralization titers (Figure S5D). However, nanoparticle-boostered mice had markedly lower neutralization titers against SARS-1 and WIV1 pseudoviruses (Figure 4D) and reduced neutralization of SARS-2 variants (Figures 4E and S5E). These data suggest that, at least for the SARS-2<sup>hg</sup> RBD, further multimerization using a ferritin nanoparticle confers minimal, if any, functional advantage.

### Isolated antibodies from expanded IgG<sup>+</sup> B cell lineages include antibodies with broad neutralization of sarbecoviruses and variants of concern

We next isolated a total of 85, 61, and 30 paired heavy- and light-chain sequences from SARS-2 RBD-specific IgG<sup>+</sup> B cells from the Trimer, Trimer<sup>hg</sup>, and Cocktail<sup>hg</sup> cohorts, respectively (Figure S6A). Overall, there was a predominance of IGHV1-42 gene usage across all cohorts, but light-chain usage varied between the control Trimer cohort and the Trimer<sup>hg</sup> and Cocktail<sup>hg</sup> cohorts (Figures S6B and S6C). CDRH3 length was significantly longer in the Trimer<sup>hg</sup> cohort, with a median of 12 amino acids versus a median of 7 in the Trimer and Cocktail<sup>hg</sup> cohorts (Figure S6D). Median somatic hypermutation was relatively similar between the cohorts (Figure S6E). We chose 5 monoclonal antibodies from 4 different clonally related populations isolated from the Trimer<sup>hg</sup> cohort to express recombinantly for further characterization (Figures 5A and S6F–S6I; Table S1). The CDRH3s of these clonally related populations were not shared with any antibodies isolated from the control Trimer cohort. Antibody 19 (Ab19) and Ab20 were SARS-2 specific, did not bind the RBM<sup>hg</sup> construct, and did not compete with CR3022, suggesting a largely RBM-directed epitope. Ab15 and the clonally related Ab16 and Ab17 (Figure S6H) were exceptionally broad in their reactivity, engaging all coronavirus RBDs tested as well as the

(E) Day 35 serum was assayed against SARS-2 variant pseudoviruses for neutralization. Statistical significance was determined using a Kruskal-Wallis test with post hoc analysis using Dunn's test corrected for multiple comparisons, and pairwise comparisons pictured without bars were not significant (\*p < 0.05, \*\*p < 0.01). Bars represent mean ± SE. See also Figure S4).



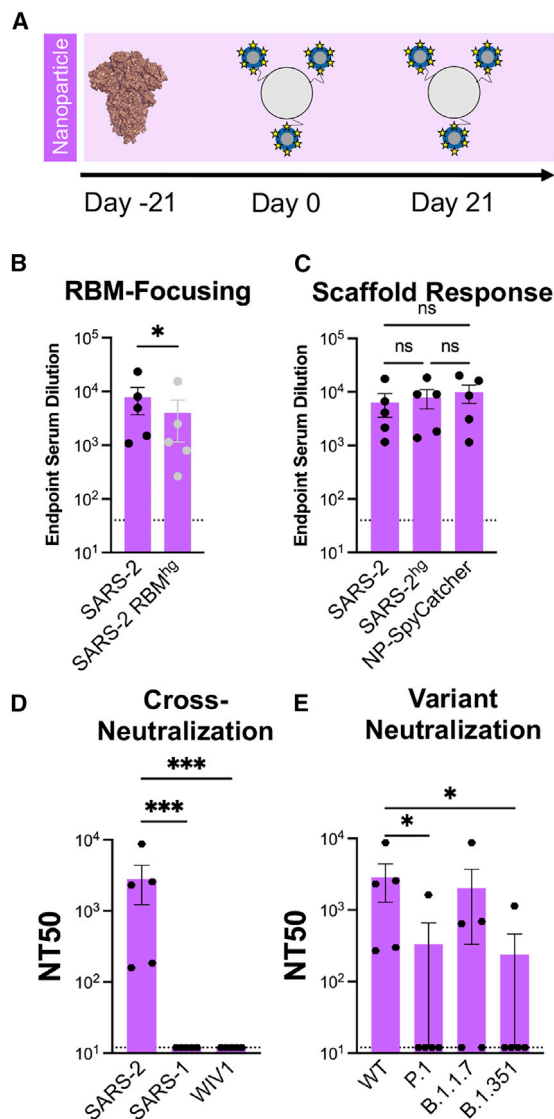

**Figure 4. Immune response following boosting with ferritin nanoparticle multimerization of SARS-2<sup>hg</sup>**

(A) Design schematic of a multimerized version of SARS-2<sup>hg</sup> using SpyTag-SpyCatcher conjugation to a ferritin nanoparticle.

(B) Serum following immunization was assayed in ELISA on day 35 with the wild-type SARS-2 RBD and RBM<sup>hg</sup>. Statistical significance was determined using Mann-Whitney *U* test (\**p* < 0.05). Bars represent mean ± SE.

(C) Day 35 serum titers to the wild-type SARS-2 RBD were also compared with titers against SARS-2<sup>hg</sup> and the unconjugated ferritin nanoparticle-SpyCatcher fusion. A Kruskal-Wallis test was performed and detected no significant differences between the serum Ab responses to these three proteins. Bars represent mean ± SE.

(D) Day 35 serum was assayed for neutralization against SARS-2, SARS-1, and WIV1 pseudoviruses. Statistical significance was determined using a Kruskal-Wallis test with post hoc analysis using Dunn's test corrected for multiple comparisons, and pairwise comparisons pictured without bars were not significant (\**p* < 0.05, \*\**p* < 0.01, \*\*\**p* < 0.001). Bars represent mean ± SE.

(E) Day 35 serum was assayed against SARS-2 variant pseudoviruses for neutralization. Statistical significance was determined using a Kruskal-Wallis test with post hoc analysis using Dunn's test corrected for multiple comparisons, and pairwise comparisons pictured without bars were not significant (\**p* < 0.05). Bars represent mean ± SE.

SARS-2 variant B.1.351 (Figure 5A). These Abs still bound the RBM<sup>hg</sup> construct and completely (Ab15) or partially (Ab16 and Ab17) competed with CR3022; affinities to the B.1.351 and RBM<sup>hg</sup> construct were between ~2- and 20-fold lower than the affinity to the SARS-2 RBD. These data suggest a conserved epitope that partially overlaps the CR3022 epitope and the RBM, like that targeted by ADI-56046 (Wec et al., 2020; Figure S6J). In addition to their broad cross-reactivity, Ab16 and Ab17 neutralized SARS-2, RaTG13, SARS-1, WIV1, and SHC014 (Figure 5B). All Abs neutralized P.1, and all except Ab19 neutralized B.1.351. Although Ab19 has no detectable affinity for RaTG13 as a Fab (Figure 5A), it still neutralizes the pseudovirus as an IgG, suggesting that avidity is required. This indicates that RBM focusing can elicit Abs capable of broadly neutralizing both related SARS-2 variants of concern and diverse sarbecoviruses.

### Structural characterization of broadly neutralizing Abs

To define the epitope targeted by these Abs, we first obtained a low-resolution (~9.2-Å) cryoelectron microscopy (cryo-EM) structure of Ab20 in complex with the SARS-2 spike (Figure 6A). Ab20 appears to target an epitope on the upper loop of the SARS-2 RBM; its footprint will likely interfere with ACE2 binding and is consistent with the observation that Ab20 does not bind the RBM<sup>hg</sup> with appreciable affinity. Moreover, Ab20 has a significant reduction in affinity for the B.1.351 RBD relative to the wild-type SARS-2 RBD; mutation E484K within the RBM of B.1.351 appears to overlap with the Ab20 footprint (Figure S4C).

We next obtained a low-resolution (5.5-Å) cryo-EM structure of Ab16 in complex with SARS-2 spike (Figures 6B–6D) and determined a high-resolution crystal structure of the clonally related Ab17 in complex with the SARS-2 RBD (Figures 6E and 6F). In the cryo-EM structure with Ab16, the SARS-2 spike is in the “three RBD up” conformation, with density for each RBD to be occupied by a Fab. Consistent with the reactivity from biolayer interferometry (BLI), Ab16 appears to engage a conserved “class 4”-like epitope (explaining the observed competition with CR3022) that includes part of the RBM, and Ab16 will likely sterically interfere with ACE2 binding (Barnes et al., 2020; Figure 6C). The complex appears to show an outward rotation of the bound RBD relative to the previously characterized “three RBD up” (PDB: 7DX9) conformation (Figure 6D). This has been hypothesized previously to contribute to SARS-1 neutralization by CR3022, and it may contribute to broad neutralization by Ab16 and Ab17 as well (Yuan et al., 2020). The higher-resolution co-crystal structure of Ab17 in complex with the SARS-2 RBD provides a more complete view of the antigen-combining site of these clonally related Abs (Figure 6E; Table S2). The crystal structure confirms a “class 4” epitope with additional interactions extending into the RBM (Barnes et al., 2020). It overlaps with previously characterized conserved epitopes targeted by Abs with broad sarbecovirus neutralization activity: Ab ADI-56046 from a human donor and Abs K288.2 and K398.22 isolated from rhesus macaques (He et al., 2021; Wec et al., 2020). The overall footprint is large, with a BSA of 1,006 Å<sup>2</sup>, and includes interactions from CDR1–CDR3 from the heavy and light chains (Figure 6F). The

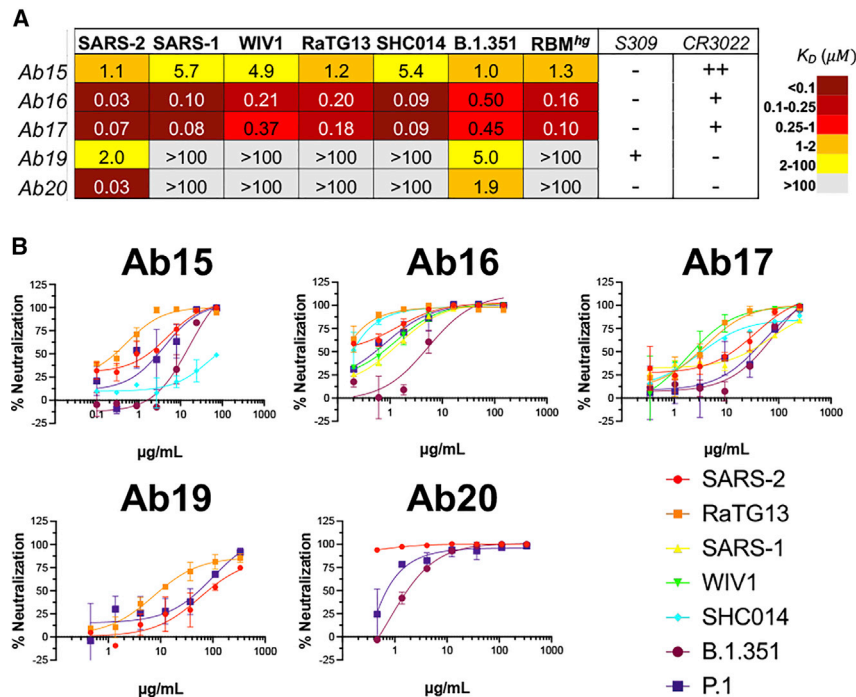

**Figure 5. SARS-2 RBD-directed B cell characteristics**

Spleens were harvested on day 42, and SARS-2 RBD-directed IgG<sup>+</sup> B cells were isolated via flow cytometry and sequenced.

(A) Abs representative of lineages that were expanded in RBM-focusing cohorts were expressed recombinantly as Fabs, and their binding was characterized using BLI.

(B) Pseudovirus neutralization for these Abs was also characterized.

See also Figure S6.

Ab16 and Ab17 epitopes are also left unmasked in the Trimer<sup>hg</sup> and Cocktail<sup>hg</sup> cohort boosting immunogens (Figure 1A), allowing immune focusing to conserved broadly neutralizing epitopes and the SARS-2 RBM.

### A SARS-2 RBM-focused serum response protects against SARS-2 infection

Given that an RBM-focused immune response appears to be potently cross-neutralizing, we evaluated whether refocusing the immune response toward the SARS-2 RBM following imprinting with the SARS-2 spike was not inferior to maintaining an immune response directed toward the full SARS-2 spike. We compared protection against infection in K18-hACE2 transgenic mice with a SARS-2 virus containing the D614G mutation following passive transfer of sera collected on day 35 from the Trimer<sup>hg</sup> cohort (Figure 7A; Winkler et al., 2020). For comparison, we used sera from mice that received SARS-2 spike protein (“Spike” cohort) three times, as well as unimmunized control mice (“Unimmunized” cohort). In comparison with the Unimmunized cohort, the Trimer<sup>hg</sup> and Spike immunization regimens conferred significant protection against weight loss (Figure 7B). We also compared the viral burden by analyzing viral RNA levels in the lungs, heart, and nasal washes 6 days after infection. In the lungs and heart, the Spike and Trimer<sup>hg</sup> sera conferred significant protection relative to the Unimmunized cohort (Figures 7C and 7D). In nasal washes, there was a significant reduction in viral burden in mice that received Spike sera relative to the Unimmunized cohort, but the difference among the mice that received the Trimer<sup>hg</sup> sera only trended toward significance (Figure 7E). Across all metrics of protection, there was not a significant difference between Spike sera and Trimer<sup>hg</sup> sera (Figures 7B–7E). These data suggest that the Trimer<sup>hg</sup> sera are relatively equiva-

lent to the Spike sera in terms of protection conferred against severe SARS-2 infection and disease in mice and that refocusing the serum immune response toward the RBM may confer potent cross-neutralization of sarbecoviruses without compromising protection against SARS-2.

### DISCUSSION

Our understanding of the durability of vaccine- or infection-elicited Ab responses to SARS-2 continues to evolve, but studies suggest that protection may wane over time (Brown et al., 2021; Nanduri et al., 2021; Pouwels et al., 2021; Rosenberg et al., 2021; Thomas et al., 2021). In comparison, data from seasonal coronaviruses, as well as SARS-1 and MERS, suggest that immunity wanes after several years and can vary in potency between individuals (Callow et al., 1990; Drosten et al., 2014; Hendley et al., 1972; Monto and Lim, 1974; Sariol and Perlman, 2020; Schmidt et al., 1986; Wu et al., 2007). Thus, if herd immunity is not achieved and/or antigenic drift of SARS-2 necessitates reformulation of current vaccines, then this may present an opportunity to “manage” immunity so that SARS-2 protection and broad sarbecovirus cross-neutralization are achieved.

Currently approved vaccines, particularly mRNA-based vaccines, provide some protection against SARS-2 variants of concern; however, it is unclear whether they will provide protection against emerging sarbecoviruses because some data show a substantial reduction in neutralization by vaccine-induced sera (Abu-Raddad et al., 2021; Collier et al., 2021; Edara et al., 2021; Shapiro et al., 2021; Wu et al., 2021). Although protein- and mRNA-based immunization strategies elicit SARS-2 and broad sarbecovirus immunity (Cohen et al., 2021; Martinez et al., 2021; Walls et al., 2021), it remains unknown whether these vaccine candidates can successfully focus immunity toward conserved cross-neutralizing epitopes in the context of SARS-2 spike imprinting. In contrast, our results suggest that, following initial SARS-2 exposure (e.g., vaccination or infection), subsequent boosting with immunogens engineered to focus on conserved epitopes could induce broad sarbecovirus immunity. Based on the data presented here, it would not occur at the expense of neutralizing activity against SARS-2. Although the RBM-focused sera and the

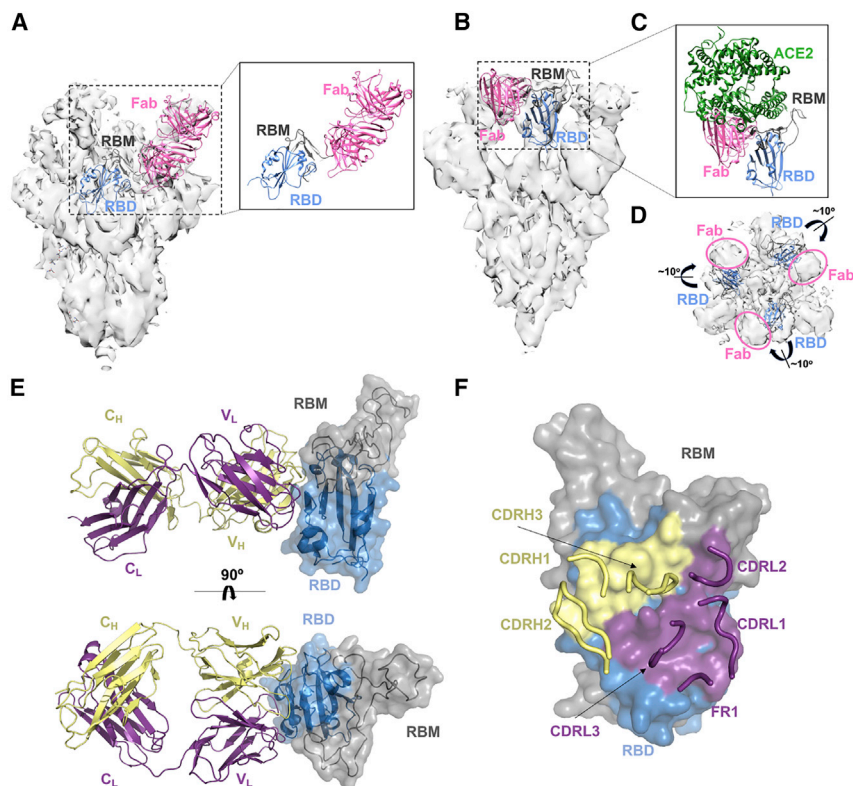

**Figure 6. Structural characterization of Abs from the RBM-focused immune response**

(A) Low-resolution cryo-EM map with a model of Ab20 as Fab (pink) bound to the RBD (blue) with the RBM (gray) shown (the RBD is from PDB: 6VXX). For clarity, only a single RBD and Fab are shown.

(B) Low-resolution cryo-EM map with a model of Ab16 as Fab (pink) bound to the RBD (blue) with the RBM (gray) shown (the RBD is from PDB: 7DX9). For clarity, only a single RBD and Fab are shown.

(C) Model from (B) with docked ACE2 (from PDB: 6M0J).

(D) Cryo-EM map with 3 docked RBDs (blue, with RBMs in gray) from the “3 RBD up” spike in PDB: 7DX9. RBDs are shown as ribbons, and the Fab Ab16 was removed to show its density and the slight outward rotation of the RBD required to better fit the density compared with the docked model.

(E) Interface of the co-crystal structure of the SARS-2 RBD and the Ab17 heavy-chain (yellow) and light-chain (purple) complex.

(F) Surface of the SARS-2 RBD in contact with Ab17 heavy-chain (yellow) and light-chain (purple) residues.

See also Figure S7.

non-RBM focused sera showed reduced neutralization potency against SARS-2 variants P.1 and B.1.351, this effect was ameliorated somewhat relative to sera from the control Trimer cohort.

In addition to its implications for shaping SARS-2 immunity following spike-based imprinting, our work also has implications for immunogen design more broadly. Monomeric as well as numerous SARS-2 multimerized RBD-based vaccine constructs have been published recently and are in various stages of pre-clinical and clinical testing (Cohen et al., 2021; Dai et al., 2020; Huang et al., 2020; Kang et al., 2021; Li et al., 2021; Liu et al., 2020b; Ma et al., 2020; Shinnakasu et al., 2021; Walls et al., 2020; Wang et al., 2021a; Yang et al., 2020). However, these multimerization platforms can give rise to a scaffold-specific Ab response, which has the potential to alter patterns of immune response. We saw no enhanced immunogenicity or immune focusing to the SARS-2 RBM when boosting with SARS-2<sup>hg</sup>-ferritin nanoparticles (Nanoparticle cohort) compared with the Trimer<sup>hg</sup> cohort. Sera from the Nanoparticle cohort demonstrated a reduced ability to neutralize related sarbecoviruses and SARS-2 variants of concern, suggesting that the ferritin nanoparticle-directed serum response may alter the SARS-2-directed Ab response. Our engineered hyperglycosylated, cysteine-stabilized GCN4 tag improves a previous hyperglycosylated version of the tag that already showed markedly reduced immunogenicity (Sliepen et al., 2015). In immunization regimens that aim to immune focus, multimerizing immunogens with non-immunogenic scaffolds may confer the benefits of increased avidity while contributing minimal additional epitopes that detrimentally alter patterns of immunodominance.

Our study also shows how to use structure-guided hyperglycosylation and resurfacing to modulate the immune response. We showed how the former strategy used in the Trimer<sup>hg</sup> and Cocktail<sup>hg</sup> cohorts could direct responses to the SARS-2 RBM. However, our findings suggest that shielding provided by engineered glycans may be imperfect. Comparing serum titers against RBM<sup>hg</sup> and SARS-2 RBDs, the Cocktail<sup>hg</sup> cohort appears to have increased RBM focusing relative to the Trimer<sup>hg</sup> cohort. This possibly suggests that boosting with rsSARS-1<sup>hg</sup> and rsWIV1<sup>hg</sup>, rather than SARS-2<sup>hg</sup>, results in increased focusing to the RBM. In other words, altering the epitopes presented in the hyperglycosylated, non-RBM portion of the RBD likely contributes to this effect because hyperglycosylation may not completely sterically occlude epitopes. Similarly, the RBM<sup>hg</sup> did not fully abrogate binding to some RBM-directed Abs, those that likely approach from angles different from B38 or ACE2—both used to characterize our RBM<sup>hg</sup> RBD construct. The observed differential binding to the RBM<sup>hg</sup> and SARS-2 RBD is only an approximation of the total RBM-directed Ab response. Nevertheless, our findings provide a framework on which future immunogen engineering efforts can build. These tools are broadly applicable to SARS-2 as well as other viruses, including other coronaviruses. Our results also suggest that leveraging multiple immunogen engineering approaches in combination can contribute to improved immune focusing.

## Conclusions

Our results demonstrate immunogen design approaches that can be leveraged to refocus Ab responses following SARS-2 spike imprinting. These design strategies are not limited to coronaviruses and are adaptable to other viruses as a general approach to elicit protective responses to conserved epitopes. Refocusing

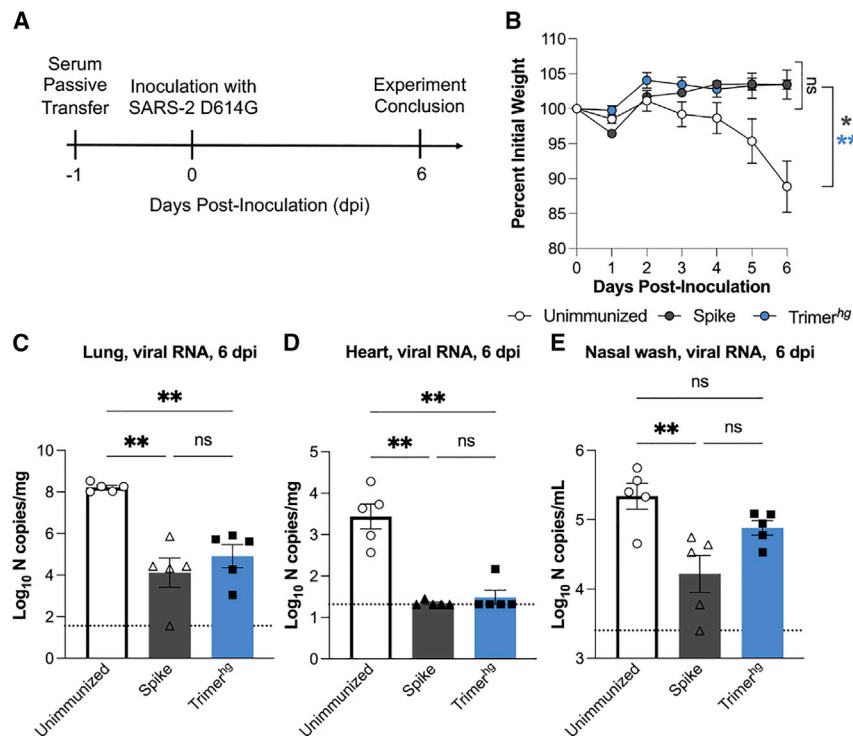

**Figure 7. SARS-2 protection studies in K18-hACE2 transgenic mice**

(A) Schematic showing the passive transfer and SARS-2 D614G live virus challenge timeline.

(B) Following inoculation with SARS-2 D614G, each mouse was weighed daily. There were 5 mice in each of the 3 cohorts. The mean + SE for the three cohorts is shown at each time point. Cohorts were compared using an ordinary one-way ANOVA with Dunnett's test of the area under the curve (\* $p < 0.05$ , \*\* $p < 0.01$ ).

(C–E) 6 days after inoculation, tissues were harvested, and viral RNA levels in the (C) lungs, (D) heart, and (E) nasal washes were assessed by qRT-PCR RNA. Cohorts were compared using a Kruskal-Wallis test with post hoc analysis using Dunn's test corrected for multiple comparisons (\* $p < 0.05$ , \*\* $p < 0.01$ ).

to the SARS-2 RBM maintains protective SARS-2 neutralization while eliciting Ab responses that recognize emerging variants and potentially neutralize coronaviruses with pandemic potential.

**Limitations of the study**

Achieving pan-variant and pan-sarbecovirus immunity in the context of pre-existing immunity to SARS-2 spike will be necessary; rationally designed immunogens that enable immune focusing to conserved sites is one possibility. Although our approach focused on RBD-based immunogens, other conserved regions within the N-terminal domain or elsewhere on spike may contribute to broad sarbecovirus immunity. SARS-2 pseudovirus neutralization assays may underestimate the contributions of Abs that target epitopes outside of the RBD, although it remains unclear to what extent this occurs when measuring a polyclonal serum response against other coronaviruses (Chen et al., 2021; Chi et al., 2020; Suryadevara et al., 2021). Still, the most potently neutralizing monoclonal Abs in humans elicited by natural infections or mRNA vaccines appear to target the RBD, emphasizing the importance of shaping the RBD-directed immune response with any potential future boosting immunizations (Greaney et al., 2021; Hansen et al., 2020; Jones et al., 2021; Rappazzo et al., 2021).

**STAR★METHODS**

Detailed methods are provided in the online version of this paper and include the following:

- KEY RESOURCES TABLE
- RESOURCE AVAILABILITY

- Lead contact
- Materials availability
- Data and code availability
- EXPERIMENTAL MODEL AND SUBJECT DETAILS
  - Mice
  - Cell lines
- METHOD DETAILS
  - Immunogen and coating protein expression and purification
  - Fab and IgG expression and purification
  - Biolayer interferometry
  - Immunizations
  - Serum ELISAs
  - Competition ELISAs
  - ACE2 cell binding assay
  - Pseudovirus neutralization assay
  - Flow cytometry
  - B cell receptor sequencing
  - Cryo-EM grid preparation and image recording
  - Cryo-EM image analysis and 3D reconstruction and model fitting
  - Crystallization
  - Structure determination and refinement
  - Animal protection experiments
  - Measurement of viral burden
- QUANTIFICATION AND STATISTICAL ANALYSIS

**SUPPLEMENTAL INFORMATION**

Supplemental information can be found online at <https://doi.org/10.1016/j.celrep.2022.110561>.

## ACKNOWLEDGMENTS

We thank members of the Schmidt Laboratory for helpful discussions. We thank Catherine Jacob-Dolan for critical reading of the manuscript. We thank Dr. Jason McLellan from the University of Texas, Austin for the spike plasmid. We thank Nir Hacohen and Michael Farzan for the kind gift of the ACE2-expressing 293T cells. We thank the beamline staff at the Advanced Photon Source (APS) NE-CAT 24-ID for support. We acknowledge funding from NIH R01 grants AI146779 (to A.G.S.); AI124378, AI137057, and AI153098 (to D.L.); and AI157155 (to M.S.D.), and a Massachusetts Consortium on Pathogenesis Readiness (MassCPR) grant (to A.G.S.). This work was also supported by training grants NIGMS T32GM007753 (to B.M.H. and T.M.C.), T32 AI007245 (to J.F.), F31 AI138368 (to M.S.), and F30 AI160908 (to B.M.H.). A.B.B. is supported by National Institutes for Drug Abuse (NIDA) Avenir New Innovator Award DP2DA040254, the MGH Transformative Scholars Program, as well as funding from the Charles H. Hood Foundation. This independent research was supported by the Gilead Sciences Research Scholars Program in HIV (to A.B.B.). J.B.C. is supported by a Helen Hay Whitney Foundation postdoctoral fellowship. This work is based on research conducted at the NE-CAT, which is funded by NIGMS (P30 GM124165). The Eiger 16M detector on 24-ID-E is funded by a NIH-ORIP HEI grant (S10OD021527). This research used resources of the APS, a DOE Office of Science User Facility operated for the DOE Office of Science by Argonne National Laboratory under contract DE-AC02-06CH11357.

## AUTHOR CONTRIBUTIONS

Conceptualization, B.M.H. and A.G.S.; methodology, B.M.H., E.C.L., I.W.W., J.B.C., T.M.C., A.B.B., D.L., and A.G.S.; investigation, B.M.H., M.S., K.J.S.D., E.C.L., J.F., T.K., I.W.W., J.B.C., and T.M.C.; writing – original draft, B.M.H. and A.G.S.; writing – review and editing, all authors; funding acquisition, M.S.D., A.B.B., D.L., and A.G.S.; supervision, M.S.D., A.B.B., D.L., and A.G.S.

## DECLARATION OF INTERESTS

B.M.H., T.M.C., and A.G.S. have filed a provisional patent for the described immunogens. M.S.D. is a consultant for Inbios, Vir Biotechnology, and Carnival Corporation and on the Scientific Advisory Boards of Moderna and Immunome. The Diamond laboratory has received unrelated funding support in sponsored research agreements from Vir Biotechnology, Moderna, and Emergent BioSolutions.

Received: November 2, 2021

Revised: January 18, 2022

Accepted: March 2, 2022

Published: March 22, 2022

## REFERENCES

Abu-Raddad, L.J., Chemaitelly, H., Butt, A.A., and National Study Group for C.-V. (2021). Effectiveness of the BNT162b2 Covid-19 vaccine against the B.1.1.7 and B.1.351 variants. *N. Engl. J. Med.* **385**, 187–189.

Adams, P.D., Afonine, P.V., Bunkoczi, G., Chen, V.B., Davis, I.W., Echols, N., Headd, J.J., Hung, L.W., Kapral, G.J., Grosse-Kunstleve, R.W., et al. (2010). PHENIX: a comprehensive Python-based system for macromolecular structure solution. *Acta Crystallogr. D Biol. Crystallogr.* **66**, 213–221.

Amanat, F., and Krammer, F. (2020). SARS-CoV-2 vaccines: status report. *Immunity* **52**, 583–589.

Bajic, G., Maron, M.J., Adachi, Y., Onodera, T., McCarthy, K.R., McGee, C.E., Sempowski, G.D., Takahashi, Y., Kelsoe, G., Kuraoka, M., et al. (2019). Influenza antigen engineering focuses immune responses to a subdominant but broadly protective viral epitope. *Cell Host Microbe* **25**, 827–835.e26.

Bajic, G., Maron, M.J., Caradonna, T.M., Tian, M., Mermelstein, A., Fera, D., Kelsoe, G., Kuraoka, M., and Schmidt, A.G. (2020). Structure-guided molecu-

lar grafting of a complex broadly neutralizing viral epitope. *ACS Infect. Dis.* **6**, 1182–1191.

Barnes, C.O., Jette, C.A., Abernathy, M.E., Dam, K.A., Esswein, S.R., Gristick, H.B., Malyutin, A.G., Sharaf, N.G., Huey-Tubman, K.E., Lee, Y.E., et al. (2020). SARS-CoV-2 neutralizing antibody structures inform therapeutic strategies. *Nature* **588**, 682–687.

Brown, C.M., Vostok, J., Johnson, H., Burns, M., Gharpure, R., Sami, S., Sabo, R.T., Hall, N., Foreman, A., Schubert, P.L., et al. (2021). Outbreak of SARS-CoV-2 infections, including COVID-19 vaccine breakthrough infections, associated with large public gatherings – Barnstable County, Massachusetts, July 2021. *MMWR Morb. Mortal Wkly. Rep.* **70**, 1059–1062.

Callow, K.A., Parry, H.F., Sergeant, M., and Tyrrell, D.A. (1990). The time course of the immune response to experimental coronavirus infection of man. *Epidemiol. Infect.* **105**, 435–446.

Chen, V.B., Arendall, W.B., 3rd, Headd, J.J., Keedy, D.A., Immormino, R.M., Kapral, G.J., Murray, L.W., Richardson, J.S., and Richardson, D.C. (2010). MolProbity: all-atom structure validation for macromolecular crystallography. *Acta Crystallogr D Biol Crystallogr* **66**, 12–21.

Chen, R.E., Zhang, X., Case, J.B., Winkler, E.S., Liu, Y., VanBlargan, L.A., Liu, J., Errico, J.M., Xie, X., Suryadevara, N., et al. (2021). Resistance of SARS-CoV-2 variants to neutralization by monoclonal and serum-derived polyclonal antibodies. *Nat. Med.* **27**, 717–726.

Chi, X., Yan, R., Zhang, J., Zhang, G., Zhang, Y., Hao, M., Zhang, Z., Fan, P., Dong, Y., Yang, Y., et al. (2020). A neutralizing human antibody binds to the N-terminal domain of the Spike protein of SARS-CoV-2. *Science* **369**, 650–655.

Cohen, A.A., Gnanapragasam, P.N.P., Lee, Y.E., Hoffman, P.R., Ou, S., Kakutani, L.M., Keeffe, J.R., Wu, H.J., Howarth, M., West, A.P., et al. (2021). Mosaic nanoparticles elicit cross-reactive immune responses to zoonotic coronaviruses in mice. *Science* **371**, 735–741.

Collaborative Computational Project, N. (1994). The CCP4 suite: programs for protein crystallography. *Acta Crystallogr. D Biol. Crystallogr.* **50**, 760–763.

Collier, D.A., De Marco, A., Ferreira, I., Meng, B., Datir, R.P., Walls, A.C., Kemp, S.A., Bassi, J., Pinto, D., Silacci-Fregni, C., et al. (2021). Sensitivity of SARS-CoV-2 B.1.1.7 to mRNA vaccine-elicited antibodies. *Nature* **593**, 136–141.

Correia, B.E., Bates, J.T., Loomis, R.J., Baneyx, G., Carrico, C., Jardine, J.G., Rupert, P., Correnti, C., Kalyuzhnyi, O., Vittal, V., et al. (2014). Proof of principle for epitope-focused vaccine design. *Nature* **507**, 201–206.

Crawford, K.H.D., Eguia, R., Dings, A.S., Loes, A.N., Malone, K.D., Wolf, C.R., Chu, H.Y., Tortorici, M.A., Velesler, D., Murphy, M., et al. (2020). Protocol and reagents for pseudotyping lentiviral particles with SARS-CoV-2 spike protein for neutralization assays. *Viruses* **12**, 513.

Crispin, M., Ward, A.B., and Wilson, I.A. (2018). Structure and immune recognition of the HIV glycan shield. *Annu. Rev. Biophys.* **47**, 499–523.

Dai, L., Zheng, T., Xu, K., Han, Y., Xu, L., Huang, E., An, Y., Cheng, Y., Li, S., Liu, M., et al. (2020). A universal design of betacoronavirus vaccines against COVID-19, MERS, and SARS. *Cell* **182**, 722–733.e11.

de St Groth, F., and Webster, R.G. (1966). Disquisitions of original antigenic sin. I. Evidence in man. *J. Exp. Med.* **124**, 331–345.

Drosten, C., Meyer, B., Muller, M.A., Corman, V.M., Al-Masri, M., Hossain, R., Madani, H., Sieberg, A., Bosch, B.J., Lattwein, E., et al. (2014). Transmission of MERS-coronavirus in household contacts. *N. Engl. J. Med.* **371**, 828–835.

Edara, V.V., Pinsky, B.A., Suthar, M.S., Lai, L., Davis-Gardner, M.E., Floyd, K., Flowers, M.W., Wrasmert, J., Hussaini, L., Ciric, C.R., et al. (2021). Infection and vaccine-induced neutralizing-antibody responses to the SARS-CoV-2 B.1.617 variants. *N. Engl. J. Med.* **385**, 664–666.

Emsley, P., and Cowtan, K. (2004). Coot: model-building tools for molecular graphics. *Acta Crystallogr. D Biol. Crystallogr.* **60**, 2126–2132.

Evans, P. (2006). Scaling and assessment of data quality. *Acta Crystallogr. D Biol. Crystallogr.* **62**, 72–82.

- Evans, P.R. (2011). An introduction to data reduction: space-group determination, scaling and intensity statistics. *Acta Crystallogr. D Biol. Crystallogr.* 67, 282–292.
- Evans, P.R., and Murshudov, G.N. (2013). How good are my data and what is the resolution? *Acta Crystallogr. D Biol. Crystallogr.* 69, 1204–1214.
- Garcia-Beltran, W.F., Lam, E.C., Astudillo, M.G., Yang, D., Miller, T.E., Feldman, J., Hauser, B.M., Caradonna, T.M., Clayton, K.L., Nitido, A.D., et al. (2021a). COVID-19-neutralizing antibodies predict disease severity and survival. *Cell* 184, 476–488.e11.
- Garcia-Beltran, W.F., Lam, E.C., St Denis, K., Nitido, A.D., Garcia, Z.H., Hauser, B.M., Feldman, J., Pavlovic, M.N., Gregory, D.J., Poznansky, M.C., et al. (2021b). Multiple SARS-CoV-2 variants escape neutralization by vaccine-induced humoral immunity. *Cell* 184, 2372–2383.e9.
- Greaney, A.J., Loes, A.N., Gentles, L.E., Crawford, K.H.D., Starr, T.N., Malone, K.D., Chu, H.Y., and Bloom, J.D. (2021). Antibodies elicited by mRNA-1273 vaccination bind more broadly to the receptor binding domain than do those from SARS-CoV-2 infection. *Sci. Transl. Med.* 13, eabi9915.
- Hansen, J., Baum, A., Pascal, K.E., Russo, V., Giordano, S., Wloga, E., Fulton, B.O., Yan, Y., Koon, K., Patel, K., et al. (2020). Studies in humanized mice and convalescent humans yield a SARS-CoV-2 antibody cocktail. *Science* 369, 1010–1014.
- Hassan, A.O., Case, J.B., Winkler, E.S., Thackray, L.B., Kafai, N.M., Bailey, A.L., McCune, B.T., Fox, J.M., Chen, R.E., Alsoussi, W.B., et al. (2020). A SARS-CoV-2 infection model in mice demonstrates protection by neutralizing antibodies. *Cell* 182, 744–753.e44.
- Hause, A.M., Baggs, J., Gee, J., Marquez, P., Myers, T.R., Shimabukuro, T.T., and Shay, D.K. (2021). Safety monitoring of an additional dose of COVID-19 vaccine - United States, august 12-september 19, 2021. *MMWR Morb Mortal Wkly Rep.* 70, 1379–1384.
- He, W.T., Yuan, M., Callaghan, S., Musharrafieh, R., Song, G., Silva, M., Beutler, N., Lee, W.H., Yong, P., Torres, J.L., et al. (2021). Broadly Neutralizing Antibodies to SARS-Related Viruses Can Be Readily Induced in Rhesus Macaques. Preprint at bioRxiv. <https://doi.org/10.1101/2021.07.05.451222>.
- Hendley, J.O., Fishburne, H.B., and Gwaltney, J.M., Jr. (1972). Coronavirus infections in working adults. Eight-year study with 229 E and OC 43. *Am. Rev. Respir. Dis.* 105, 805–811.
- Hsieh, C.L., Goldsmith, J.A., Schaub, J.M., DiVenere, A.M., Kuo, H.C., Javanmardi, K., Le, K.C., Wrapp, D., Lee, A.G., Liu, Y., et al. (2020). Structure-based design of prefusion-stabilized SARS-CoV-2 spikes. *Science* 369, 1501–1505.
- Huang, W.C., Zhou, S., He, X., Chiem, K., Mabrouk, M.T., Nissly, R.H., Bird, I.M., Strauss, M., Sambhara, S., Ortega, J., et al. (2020). SARS-CoV-2 RBD neutralizing antibody induction is enhanced by particulate vaccination. *Adv. Mater.* 32, e2005637.
- Jensen, K.E., Davenport, F.M., Hennessy, A.V., and Francis, T., Jr. (1956). Characterization of influenza antibodies by serum absorption. *J. Exp. Med.* 104, 199–209.
- Jones, B.E., Brown-Augsburger, P.L., Corbett, K.S., Westendorf, K., Davies, J., Cujec, T.P., Wiethoff, C.M., Blackbourne, J.L., Heinz, B.A., Foster, D., et al. (2021). The neutralizing antibody, LY-CoV555, protects against SARS-CoV-2 infection in nonhuman primates. *Sci. Transl. Med.* 13, eabf1906.
- Ju, B., Zhang, Q., Ge, J., Wang, R., Sun, J., Ge, X., Yu, J., Shan, S., Zhou, B., Song, S., et al. (2020). Human neutralizing antibodies elicited by SARS-CoV-2 infection. *Nature* 584, 115–119.
- Kabsch, W. (2010a). Integration, scaling, space-group assignment and post-refinement. *Acta Crystallogr. D Biol. Crystallogr.* 66, 133–144.
- Kabsch, W. (2010b). Xds. *Acta Crystallogr. D Biol. Crystallogr.* 66, 125–132.
- Kaneko, N., Kuo, H.H., Boucau, J., Farmer, J.R., Allard-Chamard, H., Mahajan, V.S., Piechocka-Trocha, A., Lefteri, K., Osborn, M., Bals, J., et al. (2020). Loss of bcl-6-expressing T follicular helper cells and germinal centers in COVID-19. *Cell* 183, 143–157.e13.
- Kang, Y.F., Sun, C., Zhuang, Z., Yuan, R.Y., Zheng, Q., Li, J.P., Zhou, P.P., Chen, X.C., Liu, Z., Zhang, X., et al. (2021). Rapid development of SARS-CoV-2 spike protein receptor-binding domain self-assembled nanoparticle vaccine candidates. *ACS Nano* 15, 2738–2752.
- Kepler, T.B., Munshaw, S., Wiehe, K., Zhang, R., Yu, J.S., Woods, C.W., Denny, T.N., Tomaras, G.D., Alam, S.M., Moody, M.A., et al. (2014). Reconstructing a B-cell clonal lineage. II. Mutation, selection, and affinity maturation. *Front Immunol.* 5, 170.
- Lan, J., Ge, J., Yu, J., Shan, S., Zhou, H., Fan, S., Zhang, Q., Shi, X., Wang, Q., Zhang, L., et al. (2020). Structure of the SARS-CoV-2 spike receptor-binding domain bound to the ACE2 receptor. *Nature* 581, 215–220.
- Letko, M., Marzi, A., and Munster, V. (2020). Functional assessment of cell entry and receptor usage for SARS-CoV-2 and other lineage B betacoronaviruses. *Nat. Microbiol.* 5, 562–569.
- Li, H., Guo, L., Zheng, H., Li, J., Zhao, X., Li, J., Liang, Y., Yang, F., Zhao, Y., Yang, J., et al. (2021). Self-assembling nanoparticle vaccines displaying the receptor binding domain of SARS-CoV-2 elicit robust protective immune responses in rhesus monkeys. *Bioconjug. Chem.* 32, 1034–1046.
- Liu, H., Wu, N.C., Yuan, M., Bangaru, S., Torres, J.L., Caniels, T.G., van Schooten, J., Zhu, X., Lee, C.D., Brouwer, P.J.M., et al. (2020a). Cross-neutralization of a SARS-CoV-2 antibody to a functionally conserved site is mediated by avidity. *Immunity* 53, 1272–1280.e75.
- Liu, Z., Xu, W., Xia, S., Gu, C., Wang, X., Wang, Q., Zhou, J., Wu, Y., Cai, X., Qu, D., et al. (2020b). RBD-Fc-based COVID-19 vaccine candidate induces highly potent SARS-CoV-2 neutralizing antibody response. *Signal. Transduct. Target. Ther.* 5, 282.
- Ma, X., Zou, F., Yu, F., Li, R., Yuan, Y., Zhang, Y., Zhang, X., Deng, J., Chen, T., Song, Z., et al. (2020). Nanoparticle vaccines based on the receptor binding domain (RBD) and heptad repeat (HR) of SARS-CoV-2 elicit robust protective immune responses. *Immunity* 53, 1315–1330.e19.
- Martinez, D.R., Schaefer, A., Leist, S.R., De la Cruz, G., West, A., Atochina-Vasserman, E.N., Lindesmith, L.C., Pardi, N., Parks, R., Barr, M., et al. (2021). Chimeric spike mRNA vaccines protect against sarbecovirus challenge in mice. *Science* 373, 991–998.
- Martinez, D.R., Schafer, A., Gobeil, S., Li, D., De la Cruz, G., Parks, R., Lu, X., Barr, M., Stalls, V., Janowska, K., et al. (2022). A broadly cross-reactive antibody neutralizes and protects against sarbecovirus challenge in mice. *Sci. Transl. Med.* 14, eabj7125.
- Mastronarde, D.N. (2005). Automated electron microscope tomography using robust prediction of specimen movements. *J. Struct. Biol.* 152, 36–51.
- McCoy, A.J., Grosse-Kunstleve, R.W., Adams, P.D., Winn, M.D., Storoni, L.C., and Read, R.J. (2007). Phaser crystallographic software. *J. Appl. Crystallogr.* 40, 658–674.
- Menachery, V.D., Yount, B.L., Jr., Debbink, K., Agnihothram, S., Gralinski, L.E., Plante, J.A., Graham, R.L., Scobey, T., Ge, X.Y., Donaldson, E.F., et al. (2015). A SARS-like cluster of circulating bat coronaviruses shows potential for human emergence. *Nat. Med.* 21, 1508–1513.
- Menachery, V.D., Yount, B.L., Jr., Sims, A.C., Debbink, K., Agnihothram, S.S., Gralinski, L.E., Graham, R.L., Scobey, T., Plante, J.A., Royal, S.R., et al. (2016). SARS-like WIV1-CoV poised for human emergence. *Proc. Natl. Acad. Sci. U S A* 113, 3048–3053.
- Monto, A.S., and Lim, S.K. (1974). The Tecumseh study of respiratory illness. VI. Frequency of and relationship between outbreaks of coronavirus infection. *J. Infect. Dis.* 129, 271–276.
- Moore, M.J., Dorfman, T., Li, W., Wong, S.K., Li, Y., Kuhn, J.H., Coderre, J., Vasileva, N., Han, Z., Greenough, T.C., et al. (2004). Retroviruses pseudotyped with the severe acute respiratory syndrome coronavirus spike protein efficiently infect cells expressing angiotensin-converting enzyme 2. *J. Virol.* 78, 10628–10635.
- Nanduri, S., Piliishvili, T., Derado, G., Soe, M.M., Dollard, P., Wu, H., Li, Q., Bagchi, S., Dubendris, H., Link-Gelles, R., et al. (2021). Effectiveness of pfizer-BioNTech and Moderna vaccines in preventing SARS-CoV-2 infection among nursing home residents before and during widespread circulation of the SARS-CoV-2 B.1.617.2 (delta) variant - National Healthcare Safety

- Network, March 1–August 1, 2021. *MMWR Morb Mortal Wkly Rep.* **70**, 1163–1166.
- Ofek, G., Guenaga, F.J., Schief, W.R., Skinner, J., Baker, D., Wyatt, R., and Kwong, P.D. (2010). Elicitation of structure-specific antibodies by epitope scaffolds. *Proc. Natl. Acad. Sci. U S A* **107**, 17880–17887.
- Petterson, E.F., Goddard, T.D., Huang, C.C., Couch, G.S., Greenblatt, D.M., Meng, E.C., and Ferrin, T.E. (2004). UCSF Chimera—a visualization system for exploratory research and analysis. *J. Comput. Chem.* **25**, 1605–1612.
- Piccoli, L., Park, Y.J., Tortorici, M.A., Czudnochowski, N., Walls, A.C., Beltramello, M., Silacci-Fregni, C., Pinto, D., Rosen, L.E., Bowen, J.E., et al. (2020). Mapping neutralizing and immunodominant sites on the SARS-CoV-2 spike receptor-binding domain by structure-guided high-resolution serology. *Cell* **183**, 1024–1042.e21.
- Pinto, D., Park, Y.J., Beltramello, M., Walls, A.C., Tortorici, M.A., Bianchi, S., Jaconi, S., Culap, K., Zatta, F., De Marco, A., et al. (2020). Cross-neutralization of SARS-CoV-2 by a human monoclonal SARS-CoV antibody. *Nature* **583**, 290–295.
- Planas, D., Bruel, T., Grzelak, L., Guivel-Benhassine, F., Staropoli, I., Porrot, F., Planchais, C., Buchrieser, J., Rajah, M.M., Bishop, E., et al. (2021). Sensitivity of infectious SARS-CoV-2 B.1.1.7 and B.1.351 variants to neutralizing antibodies. *Nat. Med.* **27**, 917–924.
- Pouwels, K.B., Pritchard, E., Matthews, P.L., Stoesser, N., Eyre, D.W., Vihta, K., House, T., Hay, J., Bell, J.I., Newton, J.N., et al. (2021). Impact of delta on viral burden and vaccine effectiveness against new SARS-CoV-2 Infections in the UK. Preprint at medRxiv. <https://doi.org/10.1101/2021.08.18.21262237>.
- Raj, V.S., Mou, H., Smits, S.L., Dekkers, D.H., Muller, M.A., Dijkman, R., Muth, D., Demmers, J.A., Zaki, A., Fouchier, R.A., et al. (2013). Dipeptidyl peptidase 4 is a functional receptor for the emerging human coronavirus-EMC. *Nature* **495**, 251–254.
- Rappazzo, C.G., Tse, L.V., Kaku, C.I., Wrapp, D., Sakharkar, M., Huang, D., Deveau, L.M., Yockachonis, T.J., Herbert, A.S., Battles, M.B., et al. (2021). Broad and potent activity against SARS-like viruses by an engineered human monoclonal antibody. *Science* **371**, 823–829.
- Rohatgi, S., Ganju, P., and Sehgal, D. (2008). Systematic design and testing of nested (RT-)PCR primers for specific amplification of mouse rearranged/expressed immunoglobulin variable region genes from small number of B cells. *J. Immunol. Methods* **339**, 205–219.
- Rosenberg, E.S., Holtgrave, D.R., Dorabawila, V., Conroy, M., Greene, D., Luterloh, E., Backenson, B., Hoefer, D., Mome, J., Bauer, U., et al. (2021). New COVID-19 cases and hospitalizations among adults, by vaccination status – New York, May 3–July 25, 2021. *MMWR Morb Mortal Wkly Rep.* **70**, 1150–1155.
- Sangesland, M., Ronsard, L., Kazer, S.W., Bals, J., Boyoglu-Barnum, S., You-sif, A.S., Barnes, R., Feldman, J., Quirindongo-Crespo, M., McTamney, P.M., et al. (2019). Germline-encoded affinity for cognate antigen enables vaccine amplification of a human broadly neutralizing response against influenza virus. *Immunity* **51**, 735–749.e38.
- Sariol, A., and Perlman, S. (2020). Lessons for COVID-19 immunity from other coronavirus infections. *Immunity* **53**, 248–263.
- Saunders, K.O., Lee, E., Parks, R., Martinez, D.R., Li, D., Chen, H., Edwards, R.J., Gobeil, S., Barr, M., Mansouri, K., et al. (2021). Neutralizing antibody vaccine for pandemic and pre-emergent coronaviruses. *Nature* **594**, 553–559.
- Scheres, S.H. (2012). RELION: implementation of a Bayesian approach to cryo-EM structure determination. *J. Struct. Biol.* **180**, 519–530.
- Schmidt, A.G., Do, K.T., McCarthy, K.R., Kepler, T.B., Liao, H.X., Moody, M.A., Haynes, B.F., and Harrison, S.C. (2015a). Immunogenic stimulus for germline precursors of antibodies that engage the influenza hemagglutinin receptor-binding site. *Cell Rep.* **13**, 2842–2850.
- Schmidt, A.G., Therkelsen, M.D., Stewart, S., Kepler, T.B., Liao, H.X., Moody, M.A., Haynes, B.F., and Harrison, S.C. (2015b). Viral receptor-binding site antibodies with diverse germline origins. *Cell* **161**, 1026–1034.
- Schmidt, O.W., Allan, I.D., Cooney, M.K., Foy, H.M., and Fox, J.P. (1986). Rises in titers of antibody to human coronaviruses OC43 and 229E in Seattle families during 1975–1979. *Am. J. Epidemiol.* **123**, 862–868.
- Shang, J., Ye, G., Shi, K., Wan, Y., Luo, C., Aihara, H., Geng, Q., Auerbach, A., and Li, F. (2020). Structural basis of receptor recognition by SARS-CoV-2. *Nature* **581**, 221–224.
- Shapiro, J., Dean, N.E., Madewell, Z.J., Yang, Y., Halloran, M.E., and Longini, I. (2021). Efficacy estimates for various COVID-19 vaccines: What we know from the literature and reports. Preprint at medRxiv. <https://doi.org/10.1101/2021.05.20.21257461>.
- Shinnakasu, R., Sakakibara, S., Yamamoto, H., Wang, P.H., Moriyama, S., Sax, N., Ono, C., Yamanaka, A., Adachi, Y., Onodera, T., et al. (2021). Glycan engineering of the SARS-CoV-2 receptor-binding domain elicits cross-neutralizing antibodies for SARS-related viruses. *J. Exp. Med.* **218**, e20211003.
- Siebring-van Olst, E., Vermeulen, C., de Menezes, R.X., Howell, M., Smit, E.F., and van Beusechem, V.W. (2013). Affordable luciferase reporter assay for cell-based high-throughput screening. *J. Biomol. Screen.* **18**, 453–461.
- Slieden, K., van Montfort, T., Melchers, M., Isik, G., and Sanders, R.W. (2015). Immunosilencing a highly immunogenic protein trimerization domain. *J. Biol. Chem.* **290**, 7436–7442.
- Supasa, P., Zhou, D., Dejnirattisai, W., Liu, C., Mentzer, A.J., Ginn, H.M., Zhao, Y., Duyvesteyn, H.M.E., Nutalai, R., Tuekprakhon, A., et al. (2021). Reduced neutralization of SARS-CoV-2 B.1.1.7 variant by convalescent and vaccine sera. *Cell* **184**, 2201–2211.e7.
- Suryadevara, N., Shrihari, S., Gilchuk, P., VanBlargan, L.A., Binshtein, E., Zost, S.J., Nargi, R.S., Sutton, R.E., Winkler, E.S., Chen, E.C., et al. (2021). Neutralizing and protective human monoclonal antibodies recognizing the N-terminal domain of the SARS-CoV-2 spike protein. *Cell* **184**, 2316–2331.e15.
- Terwilliger, T.C., Grosse-Kunstleve, R.W., Afonine, P.V., Moriarty, N.W., Zwart, P.H., Hung, L.W., Read, R.J., and Adams, P.D. (2008). Iterative model building, structure refinement and density modification with the PHENIX AutoBuild wizard. *Acta Crystallogr. D Biol. Crystallogr.* **64**, 61–69.
- Thomas, S.J., Moreira, E.D., Jr., Kitchin, N., Absalon, J., Gurtman, A., Lockhart, S., Perez, J.L., Marc, G.P., Polack, F.P., Zerbini, C., et al. (2021). Six month safety and efficacy of the BNT162b2 mRNA COVID-19 Vaccine. Preprint at medRxiv. <https://doi.org/10.1101/2021.07.28.21261159>.
- Tiller, T., Busse, C.E., and Wardemann, H. (2009). Cloning and expression of murine Ig genes from single B cells. *J. Immunol. Methods* **350**, 183–193.
- Tong, P., Gautam, A., Windsor, I.W., Travers, M., Chen, Y., Garcia, N., White-man, N.B., McKay, L.G.A., Storm, N., Malsick, L.E., et al. (2021). Memory B cell repertoire for recognition of evolving SARS-CoV-2 spike. *Cell* **184**, 4969–4980.e15.
- Walls, A.C., Fiala, B., Schafer, A., Wrenn, S., Pham, M.N., Murphy, M., Tse, L.V., Shehata, L., O'Connor, M.A., Chen, C., et al. (2020). Elicitation of potent neutralizing antibody responses by designed protein nanoparticle vaccines for SARS-CoV-2. *Cell* **183**, 1367–1382.e17.
- Walls, A.C., Miranda, M.C., Schafer, A., Pham, M.N., Greaney, A., Arunachalam, P.S., Navarro, M.J., Tortorici, M.A., Rogers, K., O'Connor, M.A., et al. (2021). Elicitation of broadly protective sarbecovirus immunity by receptor-binding domain nanoparticle vaccines. *Cell* **184**, 5432–5447.e16.
- Wang, W., Huang, B., Zhu, Y., Tan, W., and Zhu, M. (2021a). Ferritin nanoparticle-based SARS-CoV-2 RBD vaccine induces a persistent antibody response and long-term memory in mice. *Cell Mol. Immunol.* **18**, 749–751.
- Wang, Z., Schmidt, F., Weisblum, Y., Muecksch, F., Barnes, C.O., Finklin, S., Schaefer-Babajew, D., Cipolla, M., Gaebler, C., Lieberman, J.A., et al. (2021b). mRNA vaccine-elicited antibodies to SARS-CoV-2 and circulating variants. *Nature* **592**, 616–622.
- Weaver, G.C., Villar, R.F., Kanekiyo, M., Nabel, G.J., Mascola, J.R., and Lingwood, D. (2016). In vitro reconstitution of B cell receptor-antigen interactions to evaluate potential vaccine candidates. *Nat. Protoc.* **11**, 193–213.
- Webster, R.G. (1966). Original antigenic sin in ferrets: the response to sequential infections with influenza viruses. *J. Immunol.* **97**, 177–183.

- Wec, A.Z., Wrapp, D., Herbert, A.S., Maurer, D.P., Haslwanter, D., Sakharkar, M., Jangra, R.K., Dieterle, M.E., Lilov, A., Huang, D., et al. (2020). Broad neutralization of SARS-related viruses by human monoclonal antibodies. *Science* *369*, 731–736.
- Wibmer, C.K., Ayres, F., Hermanus, T., Madzivhandila, M., Kgagudi, P., Oos-thuysen, B., Lambson, B.E., de Oliveira, T., Vermeulen, M., van der Berg, K., et al. (2021). SARS-CoV-2 501Y.V2 escapes neutralization by South African COVID-19 donor plasma. *Nat. Med.* *27*, 622–625.
- Winkler, E.S., Bailey, A.L., Kafai, N.M., Nair, S., McCune, B.T., Yu, J., Fox, J.M., Chen, R.E., Earnest, J.T., Keeler, S.P., et al. (2020). SARS-CoV-2 infection of human ACE2-transgenic mice causes severe lung inflammation and impaired function. *Nat. Immunol.* *21*, 1327–1335.
- Wrapp, D., Wang, N., Corbett, K.S., Goldsmith, J.A., Hsieh, C.L., Abiona, O., Graham, B.S., and McLellan, J.S. (2020). Cryo-EM structure of the 2019-nCoV spike in the prefusion conformation. *Science* *367*, 1260–1263.
- Wu, K., Werner, A.P., Koch, M., Choi, A., Narayanan, E., Stewart-Jones, G.B.E., Colpitts, T., Bennett, H., Boyoglu-Barnum, S., Shi, W., et al. (2021). Serum neutralizing activity elicited by mRNA-1273 vaccine. *N. Engl. J. Med.* *384*, 1468–1470.
- Wu, L.P., Wang, N.C., Chang, Y.H., Tian, X.Y., Na, D.Y., Zhang, L.Y., Zheng, L., Lan, T., Wang, L.F., and Liang, G.D. (2007). Duration of antibody responses after severe acute respiratory syndrome. *Emerg. Infect. Dis.* *13*, 1562–1564.
- Wu, N.C., Yuan, M., Bangaru, S., Huang, D., Zhu, X., Lee, C.D., Turner, H.L., Peng, L., Yang, L., Burton, D.R., et al. (2020a). A natural mutation between SARS-CoV-2 and SARS-CoV determines neutralization by a cross-reactive antibody. *PLoS Pathog.* *16*, e1009089.
- Wu, Y., Wang, F., Shen, C., Peng, W., Li, D., Zhao, C., Li, Z., Li, S., Bi, Y., Yang, Y., et al. (2020b). A noncompeting pair of human neutralizing antibodies block COVID-19 virus binding to its receptor ACE2. *Science* *368*, 1274–1278.
- Yang, J., Wang, W., Chen, Z., Lu, S., Yang, F., Bi, Z., Bao, L., Mo, F., Li, X., Huang, Y., et al. (2020). A vaccine targeting the RBD of the S protein of SARS-CoV-2 induces protective immunity. *Nature* *586*, 572–577.
- Yuan, M., Huang, D., Lee, C.D., Wu, N.C., Jackson, A.M., Zhu, X., Liu, H., Peng, L., van Gils, M.J., Sanders, R.W., et al. (2021). Structural and functional ramifications of antigenic drift in recent SARS-CoV-2 variants. *Science* *373*, 818–823.
- Yuan, M., Wu, N.C., Zhu, X., Lee, C.D., So, R.T.Y., Lv, H., Mok, C.K.P., and Wilson, I.A. (2020). A highly conserved cryptic epitope in the receptor binding domains of SARS-CoV-2 and SARS-CoV. *Science* *368*, 630–633.
- Zakeri, B., Fierer, J.O., Celik, E., Chittock, E.C., Schwarz-Linek, U., Moy, V.T., and Howarth, M. (2012). Peptide tag forming a rapid covalent bond to a protein, through engineering a bacterial adhesin. *Proc. Natl. Acad. Sci. U S A* *109*, E690–E697.
- Zhou, D., Dejnirattisai, W., Supasa, P., Liu, C., Mentzer, A.J., Ginn, H.M., Zhao, Y., Duyvesteyn, H.M.E., Tuekprakhon, A., Nutalai, R., et al. (2021). Evidence of Escape of SARS-CoV-2 variant B.1.351 from natural and vaccine induced sera. *Cell* *184*, 2348–2361.



## STAR★METHODS

### KEY RESOURCES TABLE

| REAGENT or RESOURCE                                                      | SOURCE                                                  | IDENTIFIER      |
|--------------------------------------------------------------------------|---------------------------------------------------------|-----------------|
| <b>Antibodies</b>                                                        |                                                         |                 |
| CR3022                                                                   | Produced in house (Yuan et al., 2020)                   | N/A             |
| S309                                                                     | Produced in house (Pinto et al., 2020)                  | N/A             |
| P2B-2F6                                                                  | Produced in house (Ju et al., 2020)                     | N/A             |
| B38                                                                      | Produced in house (Wu et al., 2020a, 2020b)             | N/A             |
| ADI-56046                                                                | Produced in house (Wec et al., 2020)                    | N/A             |
| ADI-55689                                                                | Produced in house (Wec et al., 2020)                    | N/A             |
| ADI-55688                                                                | Produced in house (Wec et al., 2020)                    | N/A             |
| Ab15                                                                     | This paper                                              | N/A             |
| Ab16                                                                     | This paper                                              | N/A             |
| Ab17                                                                     | This paper                                              | N/A             |
| Ab19                                                                     | This paper                                              | N/A             |
| Ab20                                                                     | This paper                                              | N/A             |
| HRP-conjugated rabbit anti-mouse IgG antibody                            | Abcam                                                   | CAT#ab97046     |
| HRP-conjugated goat anti-mouse IgG, human/bovine/horse SP ads antibody   | Southern Biotech                                        | CAT#1013-05     |
| CD3-BV786                                                                | BioLegend                                               | CAT#100232      |
| CD19-BV421                                                               | BioLegend                                               | CAT#1115549     |
| IgM-BV605                                                                | BioLegend                                               | CAT#406523      |
| IgG-PerCP/Cy5.5                                                          | BioLegend                                               | CAT#405314      |
| <b>Bacterial and virus strains</b>                                       |                                                         |                 |
| Sarbecovirus pseudotyped viruses                                         | Produced in house (Garcia-Beltran et al., 2021a, 2021b) | N/A             |
| WA1/2020 SARS-CoV-2 strain with a D614G mutation                         | (Chen et al., 2021)                                     | N/A             |
| <b>Chemicals, peptides, and recombinant proteins</b>                     |                                                         |                 |
| Monomeric and trimeric SARS-2, SARS-1, and WIV1 receptor binding domains | This paper                                              | N/A             |
| Monomeric SHC014 and RaTG13 receptor binding domains                     | This paper                                              | N/A             |
| SARS-2 two-proline stabilized spike ectodomain                           | Produced in house (Wrapp et al., 2020)                  | N/A             |
| SARS-2 <sup>hg</sup> monomer and trimer                                  | This paper                                              | N/A             |
| rsSARS-1 <sup>hg</sup> monomer and trimer                                | This paper                                              | N/A             |
| rsWIV1 <sup>hg</sup> monomer and trimer                                  | This paper                                              | N/A             |
| RBM <sup>hg</sup> monomer and trimer                                     | This paper                                              | N/A             |
| Trimeric hemagglutinin head                                              | This paper                                              | N/A             |
| Pierce HRV 3C protease                                                   | ThermoScientific                                        | CAT#88946       |
| Sigma Adjuvant System                                                    | SigmaAldrich                                            | CAT#S6322       |
| Streptavidin-PE conjugate                                                | Invitrogen                                              | CAT#12-4317-87  |
| Aqua Live/Dead amine-reactive dye                                        | ThermoFisher                                            | CAT#L34957      |
| Calcein, AM, cell-permeant dye                                           | ThermoFisher                                            | CAT#C3100MP     |
| Streptavidin-APC/Cy7 conjugate                                           | BioLegend                                               | CAT#405208      |
| Streptavidin-BV650 conjugate                                             | BioLegend                                               | CAT#405232      |
| StrepTactin-PE conjugate                                                 | IBA Lifesciences                                        | Item#6-5000-001 |

(Continued on next page)

| <b>Continued</b>                                              |                                                                                |                                                                                                                                           |
|---------------------------------------------------------------|--------------------------------------------------------------------------------|-------------------------------------------------------------------------------------------------------------------------------------------|
| REAGENT or RESOURCE                                           | SOURCE                                                                         | IDENTIFIER                                                                                                                                |
| StrepTactin-APC conjugate                                     | IBA Lifesciences                                                               | Item#6-5010-001                                                                                                                           |
| RNaseOUT                                                      | ThermoFisher                                                                   | CAT#10777019                                                                                                                              |
| TALON Metal Affinity Resin                                    | Takara                                                                         | CAT#635652                                                                                                                                |
| Pierce Protein G Agarose                                      | ThermoFisher                                                                   | CAT#20399                                                                                                                                 |
| 1-Step ABTS substrate                                         | ThermoFisher                                                                   | Prod#37615                                                                                                                                |
| <b>Critical commercial assays</b>                             |                                                                                |                                                                                                                                           |
| FAB2G Biosensors                                              | ForteBio                                                                       | Item#18-5125                                                                                                                              |
| Ni-NTA Biosensors                                             | ForteBio                                                                       | Item#18-5101                                                                                                                              |
| SuperScript IV VILO MasterMix                                 | ThermoFisher                                                                   | CAT#11756050                                                                                                                              |
| Index crystal screen                                          | Hampton Research                                                               | Item#HR2-144                                                                                                                              |
| MagMax mirVana Total RNA isolation kit                        | ThermoFisher                                                                   | CAT#A27828                                                                                                                                |
| <b>Deposited data</b>                                         |                                                                                |                                                                                                                                           |
| Atomic coordinates, Ab17 and SARS-2 RBD complex               | Protein Data Bank                                                              | PDB 7TE1                                                                                                                                  |
| Electron density map, Ab16 and SARS-2 spike complex           | Electron Microscopy Data Bank                                                  | EMD-24894                                                                                                                                 |
| Electron density map, Ab20 and SARS-2 spike complex           | Electron Microscopy Data Bank                                                  | EMD-24895                                                                                                                                 |
| Ab15 variable heavy chain                                     | Genbank                                                                        | OM407408                                                                                                                                  |
| Ab16 variable heavy chain                                     | Genbank                                                                        | OM407409                                                                                                                                  |
| Ab17 variable heavy chain                                     | Genbank                                                                        | OM407410                                                                                                                                  |
| Ab19 variable heavy chain                                     | Genbank                                                                        | OM407411                                                                                                                                  |
| Ab20 variable heavy chain                                     | Genbank                                                                        | OM407412                                                                                                                                  |
| Ab15 variable light chain                                     | Genbank                                                                        | OM407413                                                                                                                                  |
| Ab16 variable light chain                                     | Genbank                                                                        | OM407414                                                                                                                                  |
| Ab17 variable light chain                                     | Genbank                                                                        | OM407415                                                                                                                                  |
| Ab19 variable light chain                                     | Genbank                                                                        | OM407416                                                                                                                                  |
| Ab20 variable light chain                                     | Genbank                                                                        | OM407417                                                                                                                                  |
| B cell receptor sequences                                     | Genbank                                                                        | See <a href="#">Table S4</a> for accession numbers                                                                                        |
| <b>Experimental models: Cell lines</b>                        |                                                                                |                                                                                                                                           |
| Human: FreeStyle 293F                                         | Thermo Fisher                                                                  | Cat#R79007; RRID: CVCL_D603                                                                                                               |
| Human: Expi293F                                               | Thermo Fisher                                                                  | Cat#A14527; RRID: CVCL_D615                                                                                                               |
| Human: HEK 293T-humanACE2                                     | ( <a href="#">Moore et al., 2004</a> )                                         |                                                                                                                                           |
| Human: HEK293S GnTI-/-                                        | ATCC                                                                           | ATCC CRL-3022                                                                                                                             |
| <b>Experimental models: Organisms/strains</b>                 |                                                                                |                                                                                                                                           |
| C57BL/6 mice (strain: C57BL/6NCr)                             | Charles River Laboratories                                                     | Strain code: 027                                                                                                                          |
| K18-hACE2 C57BL/6J mice (strain: 2B6.Cg-Tg(K18-ACE2)2PrImn/J) | Jackson Laboratory                                                             | Strain #034860                                                                                                                            |
| <b>Oligonucleotides</b>                                       |                                                                                |                                                                                                                                           |
| Murine B cell receptor sequencing primers                     | ( <a href="#">Rohatgi et al., 2008</a> ; <a href="#">Tiller et al., 2009</a> ) | See <a href="#">Table S3</a> for oligo sequences                                                                                          |
| <b>Software and algorithms</b>                                |                                                                                |                                                                                                                                           |
| FlowJo v10                                                    | TreeStar                                                                       | <a href="https://www.flowjo.com">https://www.flowjo.com</a> ; RRID: SCR_008520                                                            |
| Prism v9                                                      | GraphPad                                                                       | <a href="https://www.graphpad.com">https://www.graphpad.com</a> ; RRID: SCR_002798                                                        |
| IMGT                                                          | International ImMunoGeneTics Information System                                | <a href="http://www.imgt.org">http://www.imgt.org</a> ; RRID: SCR_012780                                                                  |
| Cloanalyst                                                    | ( <a href="#">Kepler et al., 2014</a> )                                        | <a href="https://www.bu.edu/computationalimmunology/research/software/">https://www.bu.edu/computationalimmunology/research/software/</a> |

(Continued on next page)

**Continued**

| REAGENT or RESOURCE             | SOURCE                    | IDENTIFIER                                                                                                                                                            |
|---------------------------------|---------------------------|-----------------------------------------------------------------------------------------------------------------------------------------------------------------------|
| RELION                          | (Scheres, 2012)           | <a href="https://relion.readthedocs.io/en/release-3.1/">https://relion.readthedocs.io/en/release-3.1/</a>                                                             |
| Chimera                         | (Pettersen et al., 2004)  | <a href="https://www.cgl.ucsf.edu/chimera/">https://www.cgl.ucsf.edu/chimera/</a>                                                                                     |
| PHASER                          | (McCoy et al., 2007)      | <a href="http://www.phaser.cimr.cam.ac.uk/index.php/Phaser_Crystallographic_Software">http://www.phaser.cimr.cam.ac.uk/index.php/Phaser_Crystallographic_Software</a> |
| PHENIX                          | (Adams et al., 2010)      | <a href="https://www.phenix-online.org/">https://www.phenix-online.org/</a>                                                                                           |
| COOT                            | (Emsley and Cowtan, 2004) | <a href="http://www2.mrc-lmb.cam.ac.uk/personal/pemsley/coot/">http://www2.mrc-lmb.cam.ac.uk/personal/pemsley/coot/</a>                                               |
| PyMol                           | Schrödinger               | <a href="http://www.pymol.org">http://www.pymol.org</a>                                                                                                               |
| MolProbity                      | (Chen et al., 2010)       | <a href="http://molprobity.biochem.duke.edu">http://molprobity.biochem.duke.edu</a>                                                                                   |
| XDS                             | (Kabsch, 2010a, 2010b)    | <a href="https://xds.mr.mpg.de">https://xds.mr.mpg.de</a>                                                                                                             |
| <b>Other</b>                    |                           |                                                                                                                                                                       |
| Superdex 200 Increase 10/300 GL | GE Healthcare             | Cytiva 28-9909-44                                                                                                                                                     |

**RESOURCE AVAILABILITY**

**Lead contact**

Further information and requests for resources and reagents should be directed to and will be fulfilled by the [lead contact](#), Aaron G. Schmidt ([aschmidt@crystal.harvard.edu](mailto:aschmidt@crystal.harvard.edu)).

**Materials availability**

All unique/stable reagents generated in this study will be made available on request, but we may require a payment and/or a completed materials transfer agreement if there is potential for commercial application. For non-commercial use, all unique/stable reagents generated in this study are available from the lead contact with a completed materials transfer agreement.

**Data and code availability**

- CryoEM data have been deposited in the Electron Microscopy Data Base and are available as of the date of publication. X-ray crystallography data have been deposited in the Protein Data Bank (7TE1) and are available as of the date of publication. B cell receptor sequences have been deposited in Genbank. Accession numbers are listed in the [key resources table](#).
- This paper does not report original code.
- Any additional information required to reanalyze the data reported in this paper is available from the [lead contact](#) upon request.

**EXPERIMENTAL MODEL AND SUBJECT DETAILS**

**Mice**

All immunizations were performed using female C57BL/6 mice (Charles River Laboratories, strain 027) aged 6-10 weeks. Immunization experiments were conducted with institutional IACUC approval (MGH protocol 2014N000252). Protection experiments were performed in K18-hACE2 C57BL/6J mice (strain: 2B6.Cg-Tg(K18-ACE2)2PrImn/J) were obtained from Jackson Laboratory (034860).

Animal protection studies were carried out in accordance with the recommendations in the Guide for the Care and Use of Laboratory Animals of the National Institutes of Health. The protocols were approved by the Institutional Animal Care and Use Committee at the Washington University School of Medicine (assurance number A3381-01).

**Cell lines**

FreeStyle 293F cells (Thermo Fisher Cat#R79007; RRID: CVCL\_D603), Expi293F cells (Thermo Fisher Cat#A14527; RRID: CVCL\_D615), and HEK293S GnTI<sup>-/-</sup> cells (ATCC CRL-3022) were cultured in accordance with the manufacturer's instructions. Human ACE2 expressing HEK 293T cells (Moore et al., 2004) were a gift from Nir Hacohen and Michael Farzan and were cultured in Dulbecco's Modified Eagle Medium (ThermoFisher) with 2% fetal bovine serum (Peak Serum FBS) and 1% penicillin-streptomycin at 10,000 U/mL (Gibco).

**METHOD DETAILS**

**Immunogen and coating protein expression and purification**

The SARS-CoV-2 (Genbank MN975262.1), SARS-CoV (Genbank ABD72970.1), WIV1-CoV (Genbank AGZ48828.1) RBDs were used as the basis for constructing these immunogens. To graft the SARS-2 RBM onto SARS-1 and WIV1 scaffolds to create the rsSARS-1

and rsWIV1 monomers, boundaries of SARS-2 residues 437–507 were used. All constructs were codon optimized by Integrated DNA Technologies and purchased as gblocks. Gblocks were then cloned into pVRC and sequence confirmed via Genewiz. Monomeric constructs for serum ELISA coating contained C-terminal HRV 3C-cleavable 8xHis and SBP tags. Trimeric constructs also included C-terminal HRV 3C-cleavable 8xHis tags, in addition to a hyperglycosylated GCN4 tag with two engineered C-terminal cysteines modified from a previously published hyperglycosylated GCN4 tag (Sliepen et al., 2015). Dr. Jason McLellan at the University of Texas, Austin provided the spike plasmid, which contained a non-cleavable foldon trimerization domain in addition to C-terminal HRV 3C cleavable 6xHis and 2xStrep II tags (Wrapp et al., 2020).

Expi 293F cells (ThermoFisher) were used to express proteins. Transfections were performed with Expifectamine reagents per the manufacturer's protocol. After 5–7 days, transfections were harvested and centrifuged for clarification. Cobalt-TALON resin (Takara) was used to perform immobilized metal affinity chromatography via the 8xHis tag. Proteins were eluted using imidazole, concentrated, and passed over a Superdex 200 Increase 10/300 GL (GE Healthcare) size exclusion column. Size exclusion chromatography was performed in PBS (Corning). For immunogens, HRV 3C protease (ThermoScientific) cleavage of affinity tags was performed prior to immunization. Cobalt-TALON resin was used for a repurification to remove the His-tagged HRV 3C protease, cleaved tag, and remaining uncleaved protein.

### Fab and IgG expression and purification

The variable heavy and light chain genes for each antibody were codon optimized by Integrated DNA Technologies, purchased as gblocks, and cloned into pVRC constructs which already contained the appropriate constant domains as previously described (Schmidt et al., 2015a, 2015b). The Fab heavy chain vector contained a HRV 3C-cleavable 8xHis tag, and the IgG heavy chain vector contained HRV 3C-cleavable 8xHis and SBP tags. The same transfection and purification protocol as used for the immunogens and coating proteins was used for the Fabs and IgGs.

### Biolayer interferometry

Biolayer interferometry (BLI) experiments were performed using a BLItz instrument (Fortebio) with FAB2G biosensors or Ni-NTA biosensors (Fortebio). All proteins were diluted in PBS. Fabs were immobilized to the biosensors, and coronavirus proteins were used as the analytes. To determine binding affinities, single-hit measurements were performed starting at 10  $\mu\text{M}$  to calculate an approximate  $K_D$  in order to evaluate which concentrations should be used for subsequent titrations. Measurements at a minimum of three additional concentrations were performed. Vendor-supplied software was used to generate a final  $K_D$  estimate via a global fit model with a 1:1 binding isotherm.

### Immunizations

All immunizations were performed using female C57BL/6 mice (Charles River Laboratories) aged 6–10 weeks. Mice received 20  $\mu\text{g}$  of protein adjuvanted with 50% w/v Sigma adjuvant in 100  $\mu\text{L}$  of inoculum via the intraperitoneal route. Following an initial prime (day –21), boosts occurred at days 0 and 21. Serum samples were collected for characterization on day 35 from all cohorts. All experiments were conducted with institutional IACUC approval (MGH protocol 2014N000252).

### Serum ELISAs

Serum ELISAs were executed using 96-well, clear, flat-bottom, high bind microplates (Corning). These plates were coated with 100  $\mu\text{L}$  of protein, which were adjusted to a concentration of 5  $\mu\text{g}/\text{mL}$  (in PBS). Plates were incubated overnight at 4°C. After incubation, plates had their coating solution removed and were blocked using 1% BSA in PBS with 1% Tween. This was done for 60 minutes at room temperature. This blocking solution was removed, and sera was diluted 40-fold in PBS. A 5-fold serial dilution was then performed. CR3022 IgG, similarly serially diluted (5-fold) from a 5  $\mu\text{g}/\text{mL}$  starting concentration, was used as a positive control. 40  $\mu\text{L}$  of primary antibody solution was used per well. Following this, samples were incubated for 90 minutes at room temperature. Plates were washed three times using PBS-Tween. 150  $\mu\text{L}$  of HRP-conjugated rabbit anti-mouse IgG antibody, sourced commercially from Abcam (at a 1:20,000 dilution in PBS), was used for the secondary incubation. Secondary incubation was performed for one hour, similarly at room temperature. Plates were subsequently washed three times using PBS-Tween. 1xABTS development solution (ThermoFisher) was used according to the manufacturer's protocol. Development was abrogated after 30 minutes using a 1% SDS solution, and plates were read using a SpectraMaxiD3 plate reader (Molecular Devices) for absorbance at 405 nm.

### Competition ELISAs

A similar protocol to the serum ELISAs was used for the competition ELISAs. For the primary incubation, 40  $\mu\text{L}$  of the relevant IgG at 1  $\mu\text{M}$  was used at room temperature for 60 minutes. Mouse sera were then spiked in such that the final concentration of sera fell within the linear range for the serum ELISA titration curve for the respective coating antigen, and an additional 60 minutes of room temperature incubation occurred. After removing the primary solution, plates were washed three times with PBS-Tween. Secondary incubation consisted of HRP-conjugated goat anti-mouse IgG, human/bovine/horse SP ads antibody (Southern Biotech) at a concentration of 1:4000. The remaining ELISA procedure (secondary incubation, washing, developing) occurred as described for the serum ELISAs. Percent binding loss was calculated relative to a no IgG control. Negative percent binding loss values were set to zero for the purpose of visualizations.

### ACE2 cell binding assay

ACE2 expressing 293T cells (Moore et al., 2004) (a kind gift from Nir Hacohen and Michael Farzan) were harvested. A wash was performed using PBS supplemented with 2% FBS. 200,000 cells were allocated to each labelling condition. Primary incubation occurred using 100  $\mu$ L of 1  $\mu$ M antigen in PBS on ice for 60 minutes. Two washes were performed with PBS supplemented with 2% FBS. Secondary incubation was performed using 50  $\mu$ L of 1:200 streptavidin-PE (Invitrogen) on ice for 30 mins. Two washes were performed with PBS supplemented with 2% FBS, and then cells were resuspended in 100  $\mu$ L of PBS supplemented with 2% FBS. A Stratified S1000Exi Flow Cytometer was used to perform flow cytometry. FlowJo (version 10) was used to analyze FCS files.

### Pseudovirus neutralization assay

Serum neutralization against SARS-CoV-2, SARS-CoV, WIV1-CoV, RaTG13, and SHC014 was assayed using pseudotyped lentiviral particles expressing spike proteins described previously (Garcia-Beltran et al., 2021a). Transient transfection of 293T cells was used to generate lentiviral particles. Viral supernatant titers were measured using flow cytometry of 293T-ACE2 cells (Moore et al., 2004) and utilizing the HIV-1 p24<sup>CA</sup> antigen capture assay (Leidos Biomedical Research, Inc.). 384-well plates (Grenier) were used to perform assays on a Tecan Fluent Automated Workstation. For mouse sera, samples underwent primary dilutions of 1:3 or 1:9 followed by serial 3-fold dilutions. 20  $\mu$ L each of sera and pseudovirus (125 infectious units) were loaded into each well. Plates were then incubated for 1 hour at room temperature. Following incubation, 10,000 293T-ACE2 cells (Moore et al., 2004) in 20  $\mu$ L of media containing 15  $\mu$ g/mL polybrene was introduced to each well. The plates were then further incubated at 37°C for 60–72 hours.

Cells were lysed using assay buffers described previously (Siebring-van Olst et al., 2013). Luciferase expression was quantified using a Spectramax L luminometer (Molecular Devices). Neutralization percentage for each concentration of serum was calculated by deducting background luminescence from cells-only sample wells and subsequently dividing by the luminescence of wells containing both virus and cells. Nonlinear regressions were fitted to the data using GraphPad Prism (version 9), allowing IC<sub>50</sub> values to be calculated via the interpolated 50% inhibitory concentration. IC<sub>50</sub> values were calculated with a neutralization values greater than or equal to 80% at maximum serum concentration for each sample. NT<sub>50</sub> values were then calculated using the reciprocal of IC<sub>50</sub> values. Serum neutralization potency values were calculated by dividing the NT<sub>50</sub> against a particular pseudovirus by the endpoint titer against the respective RBD. For samples with NT<sub>50</sub> values below the limit of detection, the lowest limit of detection across all neutralization assays was used as the NT<sub>50</sub> value to calculate neutralization potency. This prevents a higher limit of detection from skewing neutralization potency results. Endpoint titers were normalized relative to a CR3022 IgG control, which was run in every serum ELISA. ELISA titers that were too low to calculate an endpoint titer were set to 40, which was the starting point for the serum dilutions.

In comparing NT<sub>50</sub> values for the various cohorts across the wild-type and variant pseudoviruses, the lowest limit of detection across all neutralization assays performed for a given cohort was used for any NT<sub>50</sub> values that fell below the limit of detection. This prevents a higher limit of detection in some assays from skewing the comparison results.

### Flow cytometry

Single cell suspensions were generated from mouse spleens following isolation via straining through a 70  $\mu$ m cell strainer. Treatment with ACK lysis buffer was performed to remove red blood cells, and cells were washed with PBS. Aqua Live/Dead amine-reactive dye (0.025 mg/mL) was first used to stain single cell suspensions. The following B and T cell staining panel of mouse-specific antibodies was then applied: CD3-BV786 (BioLegend), CD19-BV421 (BioLegend), IgM-BV605 (BioLegend), IgG-PerCP/Cy5.5 (BioLegend). Staining was performed using a previously described staining approach (Sangesland et al., 2019; Weaver et al., 2016).

SBP-tagged coronavirus proteins were labelled using streptavidin-conjugated fluorophores as previously described (Kaneko et al., 2020). Briefly, a final conjugated probe concentration of 0.1  $\mu$ g/mL was achieved following the addition of streptavidin conjugates to achieve a final molar ratio of probe to streptavidin valency of 1:1. This addition was performed in 5 increments with 20 minutes of incubation at 4°C with rotation in between. The coronavirus protein panel consisted of the following fluorescent probes: SARS-CoV-2 RBD-APC/Cy7 (streptavidin-APC/Cy7 from BioLegend), WIV1 RBD-BV650 (streptavidin-BV650 from BioLegend), SARS-CoV-2 spike-StrepTactin PE (StrepTactin PE from IBA Lifesciences), and SARS-CoV-2 spike-StrepTactin APC (StrepTactin APC from IBA Lifesciences).

A BD FACSAria Fusion cytometer (BD Biosciences) was used to perform flow cytometry. FlowJo (version 10) was used to analyze the resultant FCS files. Sorted cells were IgG+ B cells that were double-positive for SARS-CoV-2 spike and positive for the SARS-CoV-2 RBD.

### B cell receptor sequencing

Cells were sorted into 96-well plates containing 4  $\mu$ L of lysis buffer, consisting of 0.5X PBS, 10 mM DTT, and 4 units of RNase-OUT (ThermoFisher). Following sorting, plates were spun down at 3000 g for 1 minute and stored at –80°C. Plates were later thawed and a reverse transcriptase reaction was performed using the SuperScript IV VIL0 MasterMix (ThermoFisher) in a total volume of 20  $\mu$ L according to the manufacturer's recommendations. Two rounds of PCR were then performed using previously published primers (Rohatgi et al., 2008; Tiller et al., 2009). Variable heavy and light chains were then sequenced via Sanger sequencing (Genewiz).

IMGT High V-Quest was used to analyze variable heavy and light chain sequences, and Cloanlyst was used to identify clonal lineages and to infer common ancestors in order to generate phylogenetic trees (Kepler et al., 2014). Data were plotted using Python and FigTree.

### Cryo-EM grid preparation and image recording

Complexes of SARS-CoV-2 spike (6P) with Ab16 Fab or Ab20 Fab were formed by combining spike at 0.7 mg/mL with Fab at 0.6 mg/mL (three-fold excess of binding sites) in a buffer composed of 10 mM Tris pH 7.5 with 150 mM NaCl (Hsieh et al., 2020). Spike·Fab complexes were incubated for 30 minutes on ice before application to thick C-flat 1.2–1.3 400 Cu mesh grids (Protochips). Grids were glow discharged (PELCO easiGlow) for 30 seconds at 15 mA and prepared with a Gatan Cryoplunge 3 by applying 3.8  $\mu$ L of sample and blotting for 4.0 seconds in the chamber maintained at a humidity between 88% and 92%. Images for Spike complexes with Ab16 or Ab20 were recorded on a Talos Arctica microscope operated at 200 keV with a Gatan K3 direct electron detector. Automated image acquisition was performed with Serial EM (Mastrorarde, 2005).

### Cryo-EM image analysis and 3D reconstruction and model fitting

Image analysis for was carried out in RELION as previously (Tong et al., 2021). Briefly, particles were extracted from motion-corrected micrographs and subjected to 2D classification, initial 3D model generation, 3D classification, and 3D refinement. Ab16 was C3 symmetric. CTF refinement was performed to correct beam tilt, trefoil, anisotropic magnification, and per particle defocus in RELION (Scheres, 2012). Bayesian polishing was also performed in RELION leading to a 6.6 Å reconstruction following 3D refinement. The final 3D refined map was sharpened with a B-factor of  $-297.5 \text{ \AA}^2$  resulting in a 5.5 Å resolution map as determined by the Fourier shell correlation (0.143 cutoff) (Figure S7A). Heavy and light chains of PDB entries 6LHQ and 4HC1 were aligned and extracted to make an initial model for the Fab. Spike with 3 RBD in the “up” conformation (PDB 7DX9) and model of Ab16 Fab were docked into the cryoEM map using Chimera (Figures 6B–6D).

Micrographs from Ab20 in complex with spike were processed as above for Ab16. Most particles exhibited C1 symmetry due to conformational heterogeneity of the RBD relative to the S2 core of spike. Accordingly, particles with C3 symmetry were isolated by 3D classification for further refinement. CTF refinement was performed to correct beam tilt, trefoil, anisotropic magnification, and per particle defocus in RELION (Scheres, 2012). Bayesian polishing was also performed in RELION leading to a 10 Å reconstruction following 3D refinement. The final 3D refined map was sharpened with a B-factor of  $-768 \text{ \AA}^2$  resulting in a 9.2 Å resolution map as determined by the Fourier shell correlation (0.143 cutoff) (Figure S7B). Heavy and light chains of PDB entries 4L5F and 4HC1 were aligned and extracted to make an initial model for the Fab. Spike with 3 RBD in the “down” conformation (PDB 6VXX) and model of Ab20 Fab were docked into the cryoEM map using Chimera (Pettersen et al., 2004) (Figure 6A).

The final reconstructions for Ab16 (EMD-24894) and Ab20 (EMD-24895) in complex with SARS-CoV-2 spike were deposited in the Electron Microscopy Data Bank.

### Crystallization

Ab17 and the SARS-2 RBD were incubated in a 1:1.2 molar ratio for 2 hours at 4°C. The resulting 1:1 complex was purified from excess SARS-2 RBD by gel filtration chromatography using a Superdex 200 Increase 10/300 GL (GE Healthcare) size exclusion column in 10 mM Tris-HCl, 150 mM NaCl, pH 7.5. The Ab17:SARS-2 RBD complex was concentrated to  $\sim 13 \text{ mg/mL}$ . Crystals grew in a hanging drop over a reservoir of 0.1 M HEPES pH 7.0% and 30% v/v Jeffamine® ED-2001 pH 7.0 (Index screen condition D3, Hampton Research). Crystals were harvested, cryoprotected with additional crystallization buffer supplemented with MPD, and flash cooled using liquid nitrogen.

### Structure determination and refinement

Diffraction data were recorded at beamline 24-ID-E at the Advanced Photon source. Data were processed using XDS via the RAPD pipeline (Collaborative Computational Project, 1994; Evans, 2006; Evans, 2011; Evans and Murshudov, 2013; Kabsch, 2010a, b). Molecular replacement was performed using PHASER (McCoy et al., 2007). Refinement was performed using PHENIX, and model modifications were performed using COOT (Adams et al., 2010; Emsley and Cowtan, 2004; Terwilliger et al., 2008). For the search model, a  $V_HV_L$  comprised of PDB entries 4L5F and 4HCI, respectively, with the CDRH3, CDRH2, and CDRL3 removed along with the SARS-2 RBD from PDB 6M0J were used. The CDRH3, CDRH2, and CDRL3 were rebuilt de novo along with mutations in the  $V_HV_L$  using COOT, and refinement was performed using PHENIX. Refinement statistics are shown in Table S2. X-ray crystallography data were deposited in the Protein DataBank (7TE1).

### Animal protection experiments

Animal studies were carried out in accordance with the recommendations in the Guide for the Care and Use of Laboratory Animals of the National Institutes of Health. The protocols were approved by the Institutional Animal Care and Use Committee at the Washington University School of Medicine (assurance number A3381–01). Virus inoculations were performed under anesthesia that was induced and maintained with ketamine hydrochloride and xylazine, and all efforts were made to minimize animal suffering.

K18-hACE2 C57BL/6J mice (strain: 2B6.Cg-Tg(K18-ACE2)2PrImn/J) were obtained from Jackson Laboratory (034860). Mice were administered 200  $\mu$ L of pooled immune sera via intraperitoneal injection. One day after transfer, mice were inoculated with  $10^3$  FFU of

WA1/2020 SARS-CoV-2 strain with a D614G mutation via the intranasal route (Chen et al., 2021). Mice were monitored for weight loss, and daily weights were recorded. On day 6 post-inoculation, final weights were obtained, animals were sacrificed, and tissues were harvested.

### Measurement of viral burden

Tissues from each mouse were weighed. Homogenization was performed with sterile zirconia beads using a MagNa Lyser instrument (Roche Life Sciences) in 1 mL of DMEM supplemented with 2% heat-inactivated fetal bovine serum. Clarification was performed via centrifugation at 10,000 rpm for 5 min. Samples were stored at  $-80^{\circ}\text{C}$ . RNA extraction was performed using the MagMax mirVana Total RNA isolation kit (Thermo Scientific) in combination with a Kingfisher Flex extraction machine (Thermo Scientific). RT-qPCR was then used to determine viral RNA levels as previously described (Hassan et al., 2020). Viral RNA levels were normalized to tissue weight.

### QUANTIFICATION AND STATISTICAL ANALYSIS

Curve fitting and statistical analyses were performed with GraphPad Prism (version 9). Non-parametric statistics were used throughout where feasible. Tests, numbers of animals, and statistical comparison groups are indicated in each of the Figure Legends. To compare multiple populations, the Kruskal-Wallis non-parametric ANOVA was used with post hoc analysis using Dunn's test for multiple comparisons. The Mann-Whitney U test was used to compare two populations without consideration for paired samples. The ratio-paired t-test was used to compare two populations with consideration for paired samples and evidence of normality. Analysis of weight change was determined by one-way ANOVA with Dunnett's test of area under the curve. p values in ANOVA analyses were corrected for multiple comparisons. A p value  $<0.05$  was considered significant.

**Cell Reports, Volume 38**

**Supplemental information**

**Rationally designed immunogens**

**enable immune focusing**

**following SARS-CoV-2 spike imprinting**

**Blake M. Hauser, Maya Sangesland, Kerri J. St. Denis, Evan C. Lam, James Brett Case, Ian W. Windsor, Jared Feldman, Timothy M. Caradonna, Ty Kannegieter, Michael S. Diamond, Alejandro B. Balazs, Daniel Lingwood, and Aaron G. Schmidt**



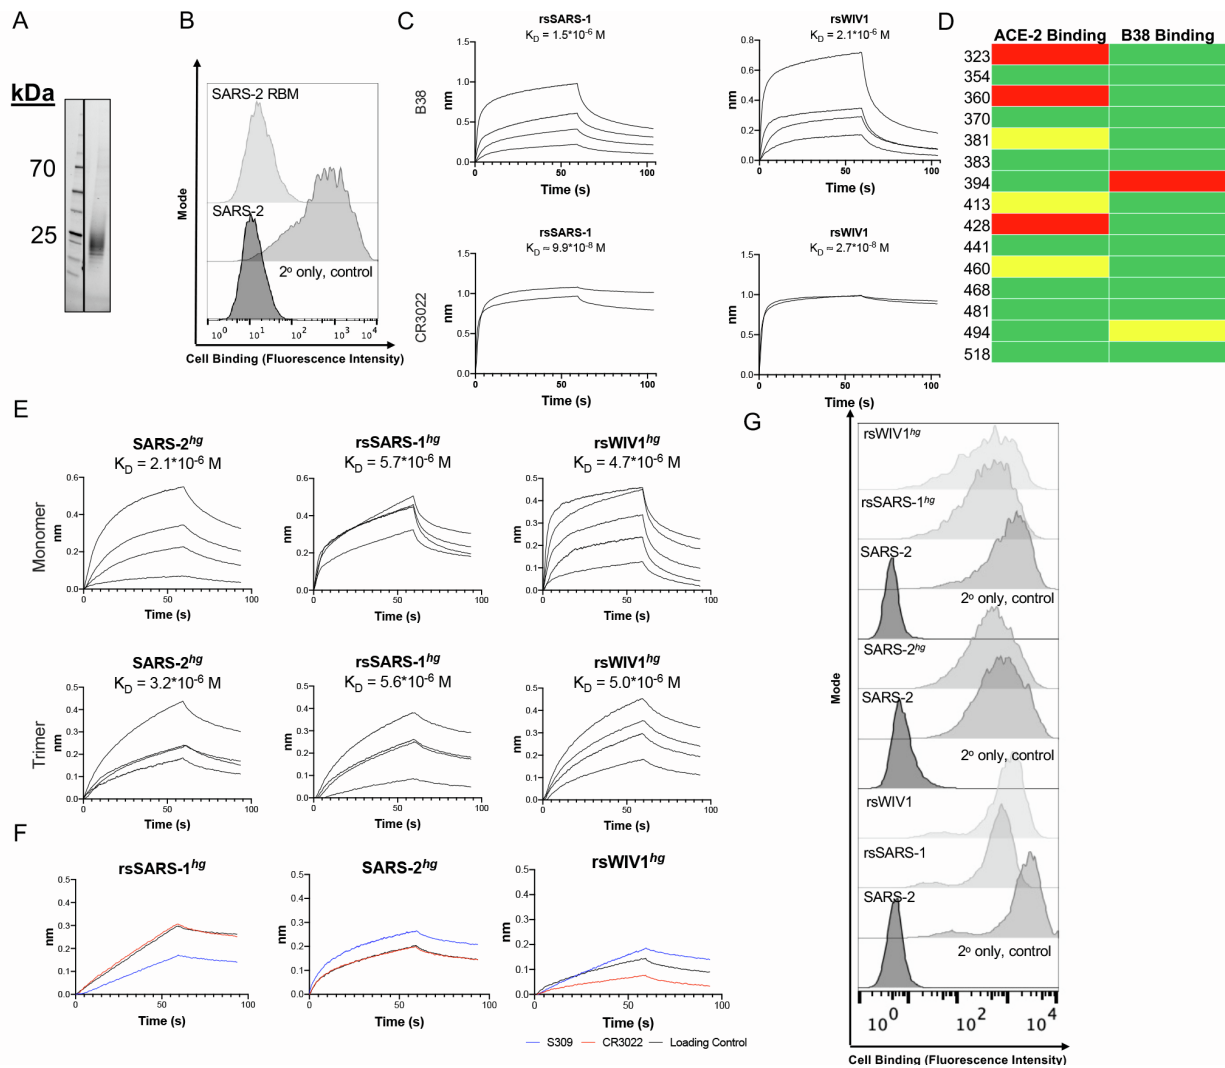

**Figure S1 (related to Fig. 1). Biochemical validation of resurfaced and hyperglycosylated immunogens.** (A) SDS-Page gel analysis of the SARS-2 receptor binding motif (RBM) construct with HRV 3C-cleavable 8xHis and streptavidin binding peptide (SBP) tags. Gel lanes containing unrelated samples have been removed. (B) ACE2 cell binding assay results for the SARS-2 RBM construct at 1  $\mu$ M. (C) After grafting the SARS-2 RBM onto the SARS-1 and WIV1 RBDs, conformationally specific Fabs B38 and CR3022 were used to confirm that these epitopes remained intact with comparable affinity to wild-type ( $9.7 \times 10^{-7}$  M for B38 Fab and SARS-2 RBD;  $2.7 \times 10^{-8}$  M for CR3022 Fab and SARS-1 RBD;  $3.7 \times 10^{-8}$  M for CR3022 Fab and WIV1 RBD). FAB2G sensors were used with immobilized fabs. rsSARS-1 and rsWIV1 were the analytes. Titrations with B38 Fab were performed at 10  $\mu$ M, 5  $\mu$ M, 1  $\mu$ M, and 0.5  $\mu$ M. Titrations with CR3022 Fab were performed at 10  $\mu$ M and 5  $\mu$ M. Vendor-supplied software was used to generate an apparent  $K_D$ , or an approximate  $K_D$  in the case of titrations with two runs. (D) Candidate glycans were tested individually in the context of the SARS-CoV-2 RBD. All glycans were designed to mask epitopes outside the RBM. Therefore, biochemical validation was performed by assessing binding to the RBM-directed conformationally specific antibody B38 via single-hit BLI using FAB2G sensors with the RBD of interest as the analyte at 10  $\mu$ M. Binding to ACE2 was also

assessed via an ACE2 cell binding assay with antigen concentrations at 1  $\mu\text{M}$ . Binding was binned subjectively into three categories: minimal (red), substantially reduced (yellow), and roughly intact (green). **(E)** Conformationally specific Fab B38 was used to assess continued accessibility of the SARS-2 RBM in both monomeric and trimeric hyperglycosylated constructs. FAB2G sensors were used with immobilized fabs; hyperglycosylated coronavirus proteins were the analytes. Titrations with B38 Fab were performed at 7.5  $\mu\text{M}$ , 5  $\mu\text{M}$ , 2.5  $\mu\text{M}$ , and 1  $\mu\text{M}$  (rsSARS-1<sup>hg</sup> trimer, rsWIV1<sup>hg</sup> trimer); 5  $\mu\text{M}$ , 2.5  $\mu\text{M}$ , 1  $\mu\text{M}$ , and 0.5  $\mu\text{M}$  (SARS-2<sup>hg</sup> trimer, SARS-2<sup>hg</sup> monomer); 10  $\mu\text{M}$ , 7.5  $\mu\text{M}$ , 5  $\mu\text{M}$ , 3.75  $\mu\text{M}$ , and 2.5  $\mu\text{M}$  (rsWIV1<sup>hg</sup> monomer); 10  $\mu\text{M}$ , 7.5  $\mu\text{M}$ , 5  $\mu\text{M}$ , and 2.5  $\mu\text{M}$  (rsSARS-1<sup>hg</sup> monomer). Vendor-supplied software was used to generate an apparent  $K_D$ . **(F)** BLI with conformationally specific Fabs CR3022 and S309 at 10  $\mu\text{M}$  was compared to loading controls for each of the hyperglycosylated monomers. The similarity in these traces to the no-antibody loading control confirms a lack of binding. **(G)** ACE2 cell binding assay results for resurfaced and hyperglycosylated constructs at 1  $\mu\text{M}$ .

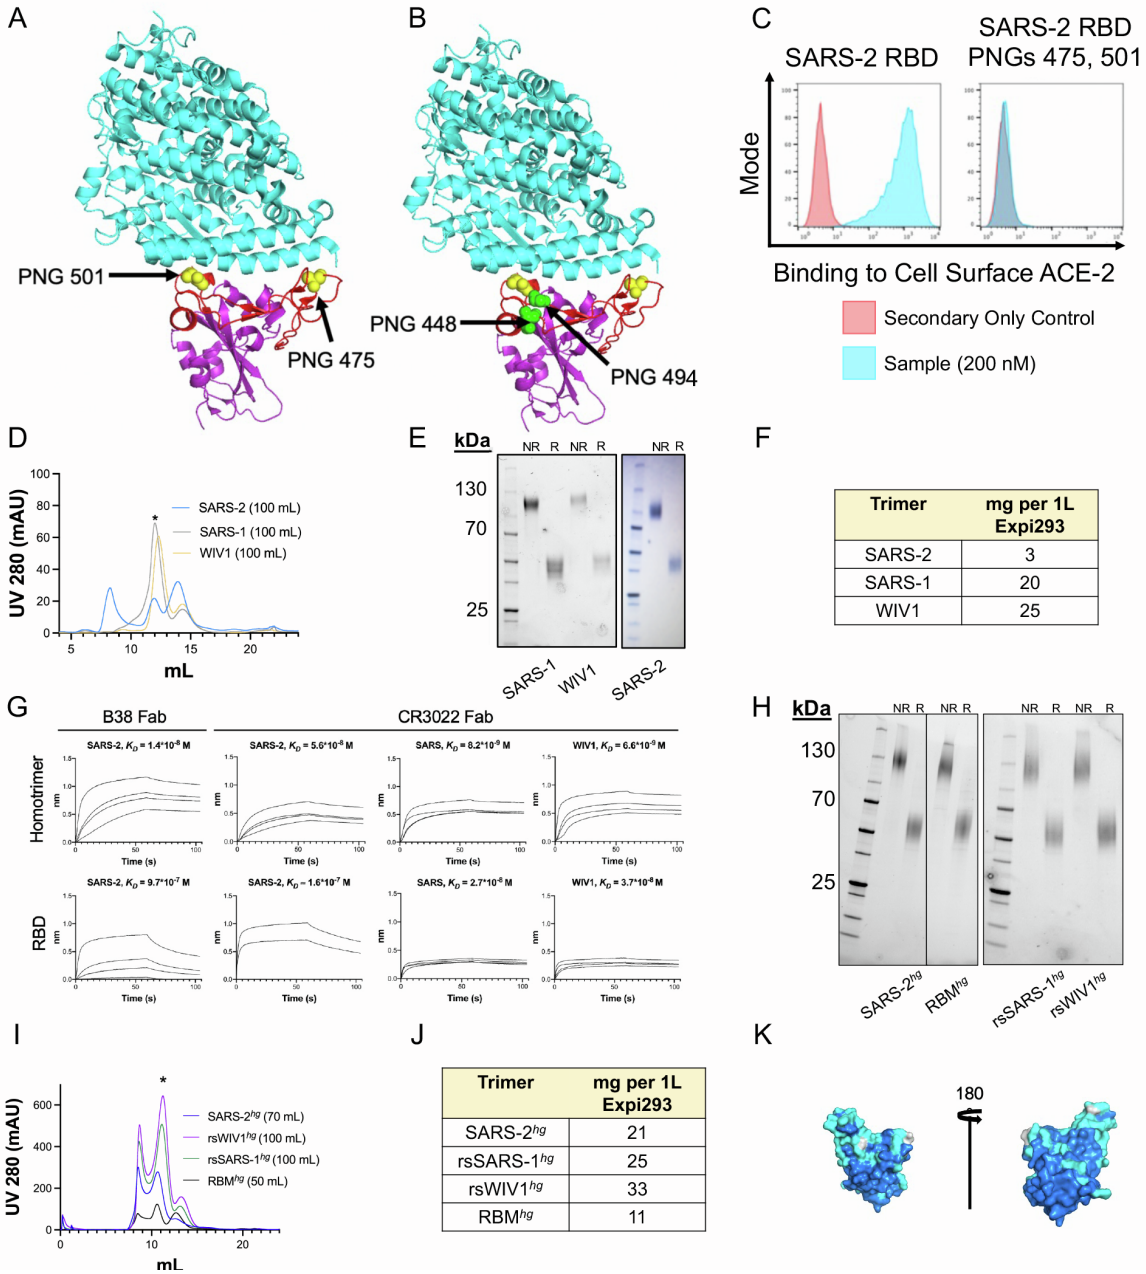

**Figure S2 (related to Fig. 1). Immunogen production and biochemical validation.** (A, B) Design and expression of two different versions of the SARS-2 RBD with additional putative N-linked glycosylation sites (PNGs) engineered onto the RBM. One construct has glycosylation sites at positions 475 and 501, while the other construct has glycosylation sites at positions 475, 501, 448, and 494. The latter is the RBM<sup>hg</sup> construct. ACE2 is shown in cyan, the RBM is shown in red, and the non-RBM portion of the SARS-2 RBD is shown in purple. (PDB: 6M0J) (C) The presence of glycans at positions 475 and 501 alone is sufficient to abrogate ACE2 binding to the RBM. (D) Representative size exclusion trace with (\*) marking the trimeric constructs. Fractions in this peak were pooled and used for immunizations. Quantity of Expi293 transfection is in parentheses next to each label. (E) SDS-PAGE analysis of purified trimers following removal of the affinity purification tags under non-reducing (NR) and reducing (R) conditions. The engineered disulfide bond at the C-terminus of the hyperglycosylated GCN4 tag separated under reducing

conditions. Panel includes monomeric RBDs run under reducing conditions for comparison. Gel lanes containing unrelated samples have been removed. **(F)** Protein yields for purified trimeric constructs in Expi293 cells. **(G)** Conformationally specific Fabs CR3022 and/or B38 were used to verify that trimer affinity was comparable (or greater than, due to increased avidity) wild-type RBD affinity. Fabs were immobilized to FAB2G sensors, and coronavirus proteins were the analytes. Trimers were titrated at 1  $\mu$ M, 750 nM, 500 nM, and 250 nM. Monomeric SARS-1 and WIV1 RBDs were titrated at 10  $\mu$ M, 5  $\mu$ M, 2.5  $\mu$ M, and 1  $\mu$ M. Monomeric SARS-2 RBD was titrated at 10  $\mu$ M, 1  $\mu$ M, 500 nM, and 100 nM with B38 Fab and at 10  $\mu$ M, 5  $\mu$ M, 750 nM, and 250 nM with CR3022 Fab. Apparent  $K_D$  was obtained by vendor-supplied software. **(H)** SDS-Page gel analysis of purified and cleaved trimeric constructs under non-reducing (NR) and reducing (R) conditions, showing the dissociation of the disulfide bond in the hyperglycosylated GCN4 tag (hgGCN4<sup>cys</sup>) under reducing conditions. Gel lanes containing unrelated samples have been removed. **(I)** Representative size exclusion chromatography traces for trimeric constructs. The trimer peak is marked with “\*”, and fractions from this peak were pooled for HRV 3C cleavage and use as immunogens. Quantity of Expi293 transfection is in parentheses next to each label. **(J)** Protein yields for purified trimeric hyperglycosylated constructs in Expi293 cells. **(K)** Strict amino acid conservation across the SARS-2 RBD (Genbank MN975262.1), SARS-1 RBD (Genbank ABD72970.1), and WIV1 RBD (Genbank AGZ48828.1) is depicted using dark blue on the structure for matches between all three genes, light blue for matches between two genes, and silver for positions where all genes differ (PDB: 6M0J).



GCN4 protein, a purification size exclusion trace (fractions in the peak marked with “\*” were pooled) and an SDS-PAGE gel run under non-reducing (NR) and reducing (R) conditions are shown. Gel lanes containing unrelated samples have been removed. **(G)** Serum ELISAs were performed against the relevant hyperglycosylated immunogens for the Trimer<sup>hg</sup> and Cocktail<sup>hg</sup> cohorts. There was no statistically significant difference in endpoint titers within the Trimer<sup>hg</sup> or Cocktail<sup>hg</sup> cohorts across these coating antigens, as determined by the Mann-Whitney U test and the Kruskal-Wallis test, respectively. Bars represent mean  $\pm$  SEM. **(H)** For all cohorts, day 35 serum samples were used in ELISAs to assess binding to RaTG13 and SHC014 RBDs. Bars represent mean  $\pm$  SEM. No statistical comparisons were performed.

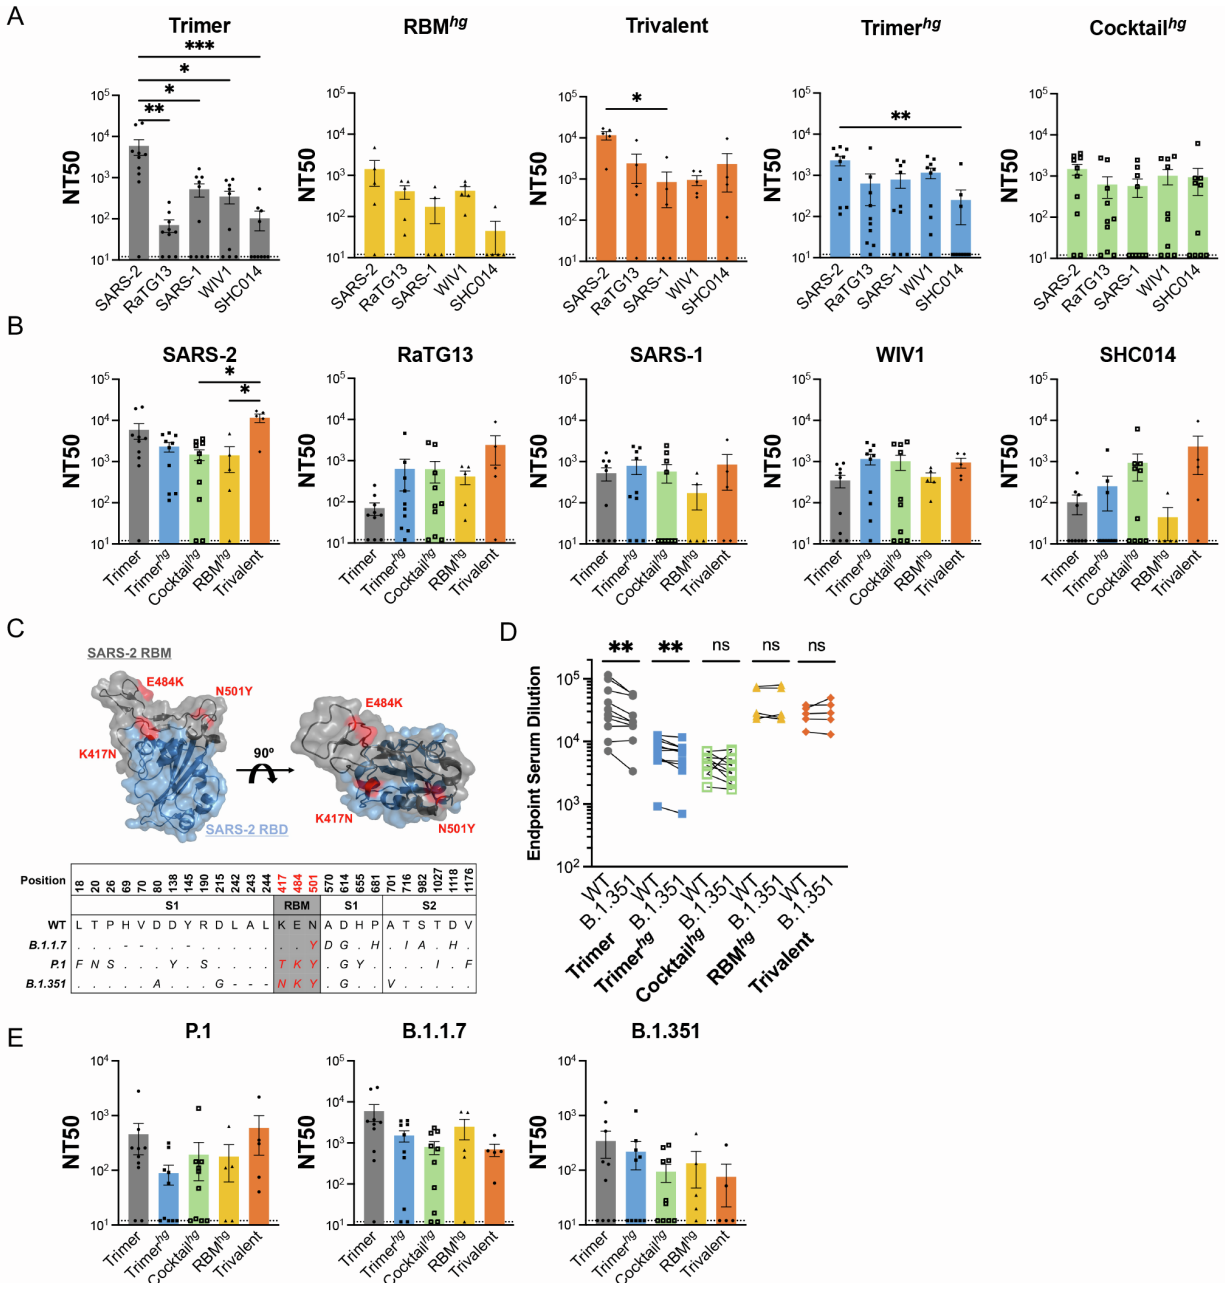

**Figure S4** (related to **Fig. 3**). **Neutralization against related sarbecoviruses and SARS-2 variants of concern.** (A) Day 35 serum from all mice was assayed for neutralization against SARS-2, RaTG13, SARS-1, WIV1, and SHC014 pseudoviruses. Statistical significance was determined using the Kruskal-Wallis test with post-hoc analysis using Dunn's test corrected for multiple comparisons, and pairwise comparisons without pictured bars were not significant (\* =  $p < 0.05$ , \*\* =  $p < 0.01$ , \*\*\* =  $p < 0.001$ ). Bars represent mean  $\pm$  SEM. (B) Pseudovirus neutralization assays were used to calculate NT50 values for SARS-2, SARS-1, WIV1, RaTG13, and SHC014 from all cohorts. All NT50s are from day 35 sera. Statistical significance was determined using the Kruskal-Wallis test with post-hoc analysis using Dunn's test corrected for multiple

comparisons in the case of a significant Kruskal-Wallis test, and pairwise comparisons without pictured bars were not significant (\* =  $p < 0.05$ ). Bars represent mean  $\pm$  SEM. **(C)** Structural depiction of SARS-2 variant RBD mutations for B.1.351 (red), as well as ACE2 contact residues (cyan). (PDB: 6M0J) Sequences depict all spike mutations across select variants. **(D)** Day 35 serum was assayed in ELISA against SARS-2 RBD (WT) and SARS-2 RBD with K417N, E484K, and N501Y mutations (B.1.351). Statistical significance was determined using the Wilcoxon sign rank test (\* =  $p < 0.05$ , \*\* =  $p < 0.01$ ; ns = not significant). **(E)** Pseudovirus neutralization assays were used to calculate NT50 values for P.1, B.1.1.7, and B.1.351 from all cohorts. All NT50s are from day 35 sera. Statistical significance was determined using the Kruskal-Wallis test; no pairwise differences are statistically significant. Bars represent mean  $\pm$  SEM.



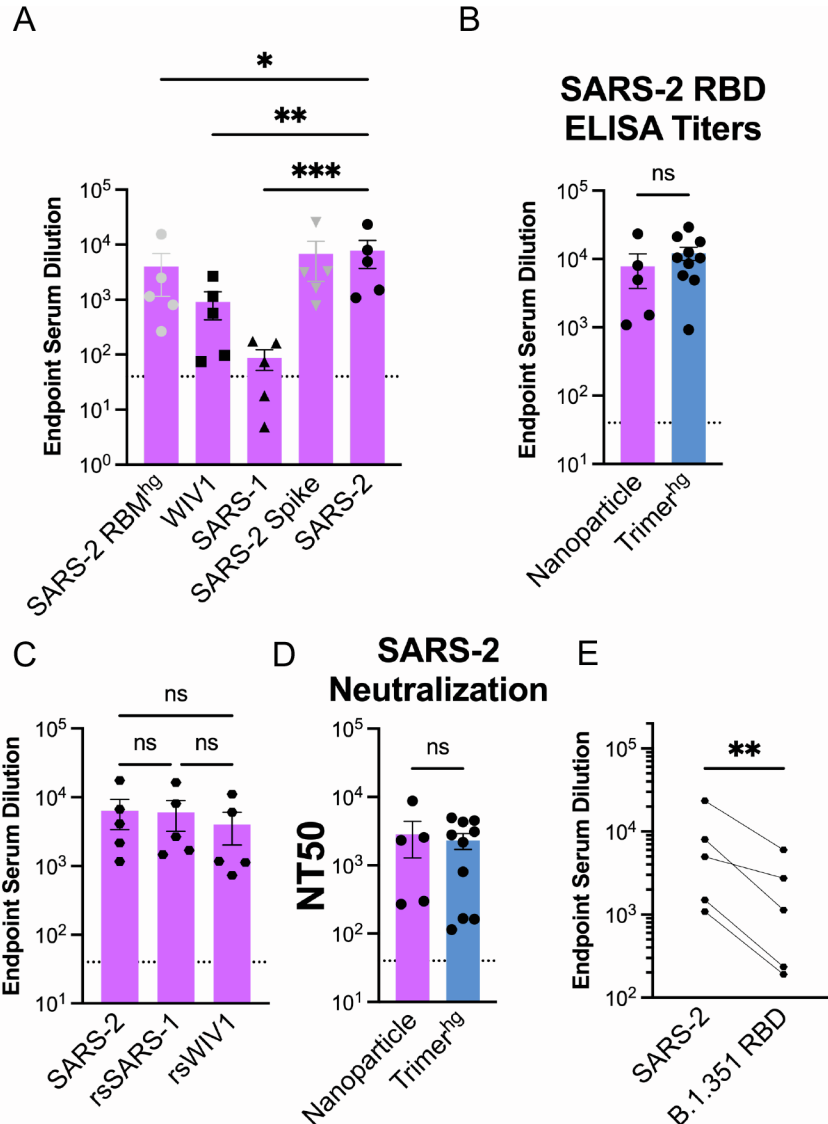

**Figure S5** (related to **Fig. 4**). **Serum antigenicity for the Nanoparticle cohort.** **(A)** Serum following immunization was assayed in ELISA at day 35 with different coronavirus antigens. Statistical significance was determined using the Kruskal-Wallis test with post-hoc analysis using Dunn's test corrected for multiple comparisons, and pairwise comparisons without pictured bars were not significant (\* =  $p < 0.05$ , \*\* =  $p < 0.01$ , \*\*\* =  $p < 0.001$ ). Bars represent mean  $\pm$  SEM. **(B)** Comparison of day 35 SARS-2 RBD ELISA endpoint titers in the Nanoparticle and Trimer<sup>hg</sup> cohorts. Statistical significance was determined using the Mann-Whitney U test (ns = not significant). Bars represent mean  $\pm$  SEM. **(C)** Day 35 serum samples assayed against rsSARS-1 and rsWIV1 RBDs no longer show statistically significant differences in binding compared to SARS-2 RBD as determined using the Kruskal-Wallis test with post-hoc analysis using Dunn's test corrected for multiple comparisons. Bars represent mean  $\pm$  SEM. **(D)** Comparison of day 35 SARS-2 pseudovirus neutralization in the Nanoparticle and Trimer<sup>hg</sup> cohorts. Statistical significance was determined using the Mann-Whitney U test (ns = not significant). Bars represent

mean  $\pm$  SEM. **(E)** Day 35 serum was assayed in ELISA against SARS-2 RBD (WT) and SARS-2 RBD with K417N, E484K, and N501Y mutations (B.1.351). Statistical significance was determined using the Wilcoxon sign rank test (\* =  $p < 0.05$ , \*\* =  $p < 0.01$ ).

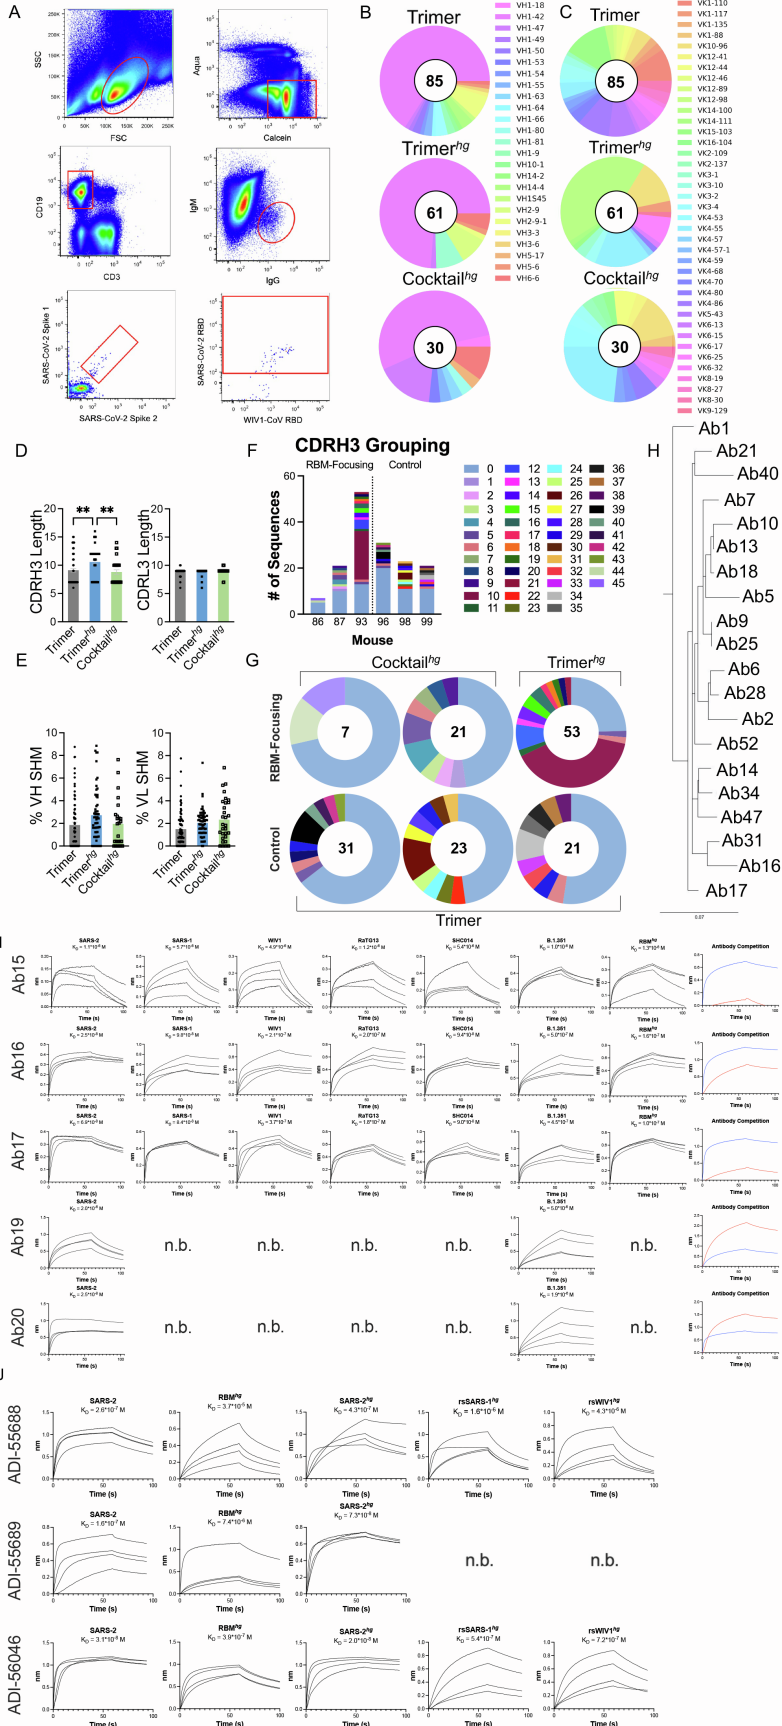

**Figure S6** (related to **Fig. 5**). **SARS-2 RBD-directed B cell characteristics.** **(A)** Gating scheme for isolating IgG<sup>+</sup> B cells that are SARS-2 spike double-positive and SARS-CoV-2 RBD positive. Spleens were harvested at day 42 and SARS-2 RBD-directed IgG<sup>+</sup> B cells were isolated via flow cytometry and sequenced. B cell receptor sequencing was used to characterize **(B)** heavy and **(C)** light chain V-gene usage. All gene families listed are \*01 except VH1-84\*02. Complementarity determining region 3 (CDR3) length **(D)** and percent somatic hypermutation (SHM) **(E)** were also analyzed for each sequence. SHM was not analyzed for cohorts with uncertain IMGT V-gene assignments. Statistical significance was determined using the Kruskal-Wallis test with post-hoc analysis using Dunn's test corrected for multiple comparisons, and pairwise comparisons without pictured bars were not significant (\* =  $p < 0.05$ , \*\* =  $p < 0.01$ ). Bars represent mean  $\pm$  SEM. Within each mouse, clonal lineages were analyzed on the basis of CDRH3 similarity. CDRH3 groupings are represented by count **(F)** and proportion **(G)** within each mouse. Not all sequences were successfully grouped into lineages. **(H)** Phylogenetic tree of a large clonal lineage containing Ab16 and Ab17 generated using Cloanlyst to infer common ancestors. **(I)** BLI was performed using Fabs representative of lineages expanded in RBM-focusing cohorts. Ni-NTA biosensors were used with Fabs bound to the sensor using the 8xHis tag and RBDs in solution as the analyte. Titrations were performed at 10  $\mu$ M, 5  $\mu$ M, 2.5  $\mu$ M, and 1  $\mu$ M. Vendor-supplied software was used to generate an apparent  $K_D$ . **(J)** Conformationally specific Fabs ADI-55688, ADI-55689, and ADI-56046, which target a conserved RBM epitope, were used to assess binding to the RBM<sup>hg</sup>, SARS-2<sup>hg</sup>, rsSARS-1<sup>hg</sup>, and rsWIV1<sup>hg</sup> monomers via BLI. FAB2G sensors were used with immobilized fabs; coronavirus proteins were the analytes. Titrations were performed at 10  $\mu$ M, 5  $\mu$ M, 2.5  $\mu$ M, and 1.25  $\mu$ M (SARS-2 RBD and SARS-2<sup>hg</sup> with ADI-55689, SARS-2 RBD and SARS-2<sup>hg</sup> with ADI-56046, all titrations with RBM<sup>hg</sup>); 3  $\mu$ M, 1.5  $\mu$ M, 0.75  $\mu$ M, and 0.375  $\mu$ M (rsSARS-1<sup>hg</sup> and rsWIV1<sup>hg</sup> with ADI-56046); 10  $\mu$ M, 5  $\mu$ M, 2.5  $\mu$ M, and 1  $\mu$ M (all titrations with ADI-55688 except RBM<sup>hg</sup>). Minimal binding was detected to ADI-55689 Fab with rsSARS-1<sup>hg</sup> and rsWIV1<sup>hg</sup>. Vendor-supplied software was used to generate an apparent  $K_D$ .

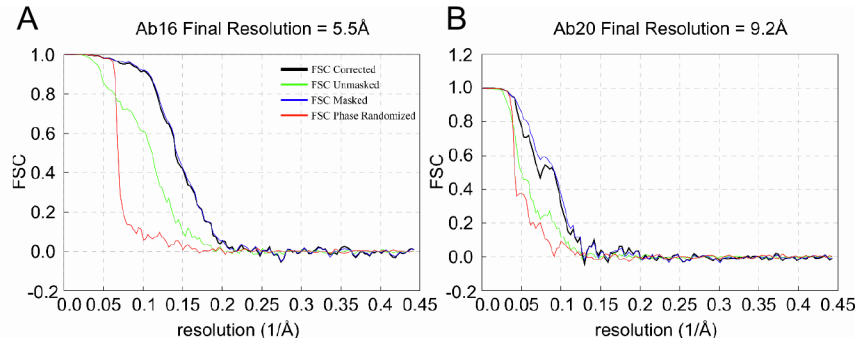

**Figure S7** (related to **Fig. 6**). **Supporting data for moderate-resolution structures of Ab16 and Ab20 complexes.** Fourier shell correlation plots show the nominal resolution of the spike complex of Ab16 is 5.5 Å (**A**) and Ab20 is 9.2 Å (**B**) (0.143 cutoff).

| Antibody | VH Sequence                                                                                                                                                                                                                                                                                                                                                                                   | VL Sequence                                                                                                                                                                                                                                                                                                                                               |
|----------|-----------------------------------------------------------------------------------------------------------------------------------------------------------------------------------------------------------------------------------------------------------------------------------------------------------------------------------------------------------------------------------------------|-----------------------------------------------------------------------------------------------------------------------------------------------------------------------------------------------------------------------------------------------------------------------------------------------------------------------------------------------------------|
| Ab15     | GAGGTCCAGCTGCAGCAGTCTGGACCTGAGCTGGTGAAGCCTGGGGCTTCAGT<br>GAAGATATCCTGCAAGGCTTCTGGTTACTCATTCACTGGCTACTACATGAAGTGG<br>GTGAAGCAAAGTCTGAAAAGAGCCTTGAGTGGATTGGAGAGATTAATCCTAACTT<br>TGGTGGTACTACCTACAACCAGAAGTTCAGGCCAAGGCCACATTGACTGTAGAC<br>AAATCCTCCAGCACAGCTACATGCAGCTCAAGAGCCTGACATCTGAGGACTCTG<br>CAGTCTATTACTGTGCAAGATACTATGTAACCTCTATGCTATGGACTACTGGGGT<br>CAAGGAACCTCAGTACCCTCTCC         | GACATCCTGATGACCCAGTCTCCATCCTCCATGTCTGTATCTCTGGGAGACACAG<br>TCAGCATCACTTGCCATGCAAGTCAGGGCATTAGCAGTAATATAGGGTGGTTGCA<br>GCAGAAACCAGGGAAATCATTAAAGGGCCTGATCTATCATGGAAACCACTTGGAA<br>GATGGAGTTCATCAAGTTCAGTGGCAGTGGATCTGGAGCAGCTTATTCTCTCA<br>CCATCAGCAGCCTGGAATCTGAAGATTTGACAGACTATTACTGTGTACAGTATACT<br>CATTTCCGTACACGTTCCGAGGGGGGACCAAGCTGGAATAAAA         |
| Ab16     | GAGGTCCAGCTGCAGCAGTCTGGACCTGAGCTGGTGAAGCCTGGGGCTTCAGT<br>GAAGATATCCTGCAAGGCTTCTGGTTACTCATTAACTACTACATGAAGTGGG<br>TGAAGCAGAGTCTGAAAAGAGCCTTGAGTGGATTGGAGAGATTAATCCTAACTC<br>TGGTTACTTCTACAACCAGAAGTTCAGGGCCAAGGCCACATTGACTGTAGACA<br>AATCCTCCACCACAGCCTACATGCAGCTCAAGAGCCTGACATCTGAGGACTCTGC<br>GGTCTATTACTGTGCAAGATACTTTGGTAACTCTTTGCTATGGACTCTGGGGT<br>CAAGGAACCTCAGTACCCTCTCC               | GACATCCTGATGACCCAATCTCCATCCTCCATGTCTGTATCTCTGGGAGACACAGT<br>CAGCATCACTTGCCATGCAAGTCAGGGCATTGGCAGTAATATAGGGTGGTTGCAG<br>CAGAAACCAGGGAAATCATTAAAGGGCCTGATCTATCTGGAACCAACTTGAAGA<br>TGGAGTTCATCAAGTTCAGTGGCAGTGGATCTGGAGCAGATTATTCTCTCACC<br>ATCAGCAGCCTGGAATCTGAAGATTTTGCAGACTATTACTGTGTACAGTATGTTCA<br>GTTCCGTACACGTTCCGAGGGGGGACCAAGCTGGAATAAAA           |
| Ab17     | GAGGTCCAGCTGCAGCAGTCTGGACCTGAGCTGGTGAAGCCTGGGGCTTCAGT<br>GAAGATATCCTGCAAGGCTTCTGGTTACTCATTCACTGACTACTACATGAAGTGG<br>TGAAGCAAAGTCTGAAAAGAGCCTTGAGTGGATTGGAGAGATTAATCCTAACTC<br>GGTGGTACTACCTACAACCAGAAGTTCAGGCCAAGGCCACATTGACTGTAGACA<br>AATCCTCCAGCACAGCCTACATGCAGCTCAAGAGCCTGACATCTGAGGACTCTGC<br>AGTCTATTACTGTGCAAGATACTATGTAACCTCTATGCTATGGACTACTGGGGT<br>AAGGAACCTCAGTACCCTCTCTCA         | GACATCCTGATGACCCAATCTCCATCCTCCATGTCTGTATCTCTGGGAGACACAGT<br>CAGCATCACATGCCATGCAAGTCAGGGCATAAGTAGTAATATAGGGTGGTTGCAG<br>CAGAAACCAGGGAAATCATTAAAGGGCCTGATCTATCATGGAACCAACTTGAAGA<br>TGGAGTTCATCAAGTTCAGTGGCAGTGGATCTGGAGCAGATTATTCTCTCACC<br>ATCAGCAGCCTGGAATCTGAAGATTTTGCAGACTATTACTGTGTACAGTATGTTCA<br>GTTCCGTACACGCTCCGAGGGGGGACCAAGCTGGAATAAAA          |
| Ab19     | CAGGTTCAAGCTGCAGCAGTCTGGACCTGAGCTGGCGAGGCCTGGGGCTTCAGT<br>GAAGCTGCTGCAAGGCTTCTGGTACCCTTCACAAGCTATGGTATAAACTGG<br>GTGAAGCAGAGAACTGGACAGGGCCTTGAGTGGATTGGAGAGATTAATCCTAGAA<br>TTGGAATACTACTATAATGAGAAGTTCAGGGCCAAGGCCACACTGACTGCAGAC<br>AAATCCTCCAGCACAGCCTACATGGAGTTCAGCAGCCTGACATCTGAGGACTCTG<br>CGGTCTATTTCTGTGCAAGATCGTGAATAGTAACCTACGGGGAGTACTACTTTGA<br>CTACTGGGGCCAAGGCACCCTCTCAGACTCTCC | GACATTGTGATGACCCAGTCTCACAATTCATGTCCACATCAATAGGAGACAGGGT<br>CAGCATCACCTGCAAGGCCAGTCAGGATGTGAGTACTGCTGTAGCCTGGTATCAA<br>CAAAAACCAGGGCAATCTCCTAAGTTACTGATTACTGGGCATCCACCCGGCACAC<br>TGGAGTCCCTGATCGCTTCACAGGCAGTGGATCTGGGACAGATTATACTCTCACC<br>ATTAGAAGTGTGCAGGCAGAAGCCTGGCCTTTATTACTGTGCAACCAATTATAG<br>CACTCCGTACACGTTCCGAGGGGGGACCAAGCTGGAATAAAA          |
| Ab20     | GAGGTCCAGCTGCAGCAGTCTGGACCTGAGCTGGTGAAGCCTGGGGCTTCAGT<br>GAAGATATCCTGCAAGGCTTCTGGTTTCTCATTCACTGGCTACTCCATGAAGTGG<br>TGAACAAGTCTGAAAAGAGCCTTGAGTGGATTGGAGAAATTAATCCTACCCTG<br>GGTGGTACTACCTACAACCAGAAGTTCAGGCCAAGGCCACATTGACTGTAGACA<br>AATCCTCCAGCACAGCCTACATAACAACCTCAAGAGCCTGACATCTGAGGACTCTGCA<br>GTCTATTACTGTGCAAGGGCCGGGCCACTACTGGGGCCAAGGCACCCTCTC<br>ACAGTCTCTCA                       | GACATTGTGCTACCCAATCTCCAGCTTCTTTGGCTGTGTCTTAGGGCAGAGAG<br>CCACCATCTCCTGCAGAGCCAGTGAAGTGTGAATATTATGGCACAGGTTTGT<br>GCAGTGGTCCAACAGAAACCAGGACAGCCACCAACTCCTCATCTATGCTGCC<br>TCCAACGTGGAATCTGGGGTCCCTGCCAGGTTTGTGGCAGTGGGCTGGGACA<br>GACTTCAGCCTCAACATCCATTCTGTGGAGGAGGATGATATTGCAATGATTTCTG<br>TCACCAAAAGTAGGAAGCTCCGTGGAGCTTCCGTGGAGGCACCAAGCTGGAAT<br>CAAA |

**Table S1** (related to **Fig. 5**). VH and VL sequences for antibodies selected for recombinant expression and characterization as shown in **Fig. 5E**.

|                                              | <b>Ab17 in complex with SARS-2 RBD</b> |
|----------------------------------------------|----------------------------------------|
| <b>Wavelength (Å)</b>                        | 0.9792                                 |
| <b>Resolution range (Å)</b>                  | 74.66 - 3.5 (3.625 - 3.5)              |
| <b>Space group</b>                           | P 41 21 2                              |
| <b>Unit cell (Å)</b>                         | 207.931 207.931 86.662                 |
| <b>(°)</b>                                   | 90 90 90                               |
| <b>Total reflections</b>                     | 513207 (54030)                         |
| <b>Unique reflections</b>                    | 24538 (2401)                           |
| <b>Multiplicity</b>                          | 20.9 (22.5)                            |
| <b>Completeness (%)</b>                      | 99.98 (100.00)                         |
| <b>Mean I/sigma(I)</b>                       | 13.89 (3.37)                           |
| <b>Wilson B-factor</b>                       | 104.62                                 |
| <b>R<sub>merge</sub></b>                     | 0.3361 (1.898)                         |
| <b>R<sub>meas</sub></b>                      | 0.3446 (1.942)                         |
| <b>R<sub>pim</sub></b>                       | 0.07551 (0.4066)                       |
| <b>CC1/2</b>                                 | 0.998 (0.85)                           |
| <b>CC*</b>                                   | 0.999 (0.959)                          |
| <b>Reflections used in refinement</b>        | 24537 (2401)                           |
| <b>Reflections used for R<sub>free</sub></b> | 1206 (118)                             |
| <b>R<sub>work</sub></b>                      | 0.296 (0.339)                          |
| <b>R<sub>free</sub></b>                      | 0.345 (0.405)                          |
| <b>CC(work)</b>                              | 0.799 (0.738)                          |
| <b>CC(free)</b>                              | 0.777 (0.583)                          |
| <b>Protein residues</b>                      | 1178                                   |
| <b>RMS (bonds) (Å)</b>                       | 0.003                                  |
| <b>RMS (angles) (°)</b>                      | 0.80                                   |
| <b>Ramachandran favored (%)</b>              | 94.99                                  |
| <b>Ramachandran allowed (%)</b>              | 4.83                                   |
| <b>Ramachandran outliers (%)</b>             | 0.18                                   |
| <b>Rotamer outliers (%)</b>                  | 0.00                                   |
| <b>Clashscore</b>                            | 13.81                                  |
| <b>Average B-factor</b>                      | 95.58                                  |

**Table S2 (related to Fig. 6). Crystallographic data and refinement statistics.** Statistics for the highest-resolution shell are shown in parentheses.

| Oligo Name | Sequence - 5' to 3'             |
|------------|---------------------------------|
| MsVHE_F    | GGGAATTCGAGGTGCAGCTGCAGGAGTCTGG |
| CyR_ext1   | AGGGAAATARCCCTTGACCAG           |
| CyR_ext2   | AGGGAAGTAGCCTTTGACAAG           |
| CyR_int1   | GGCCAGTGGATAGACHGATG            |
| CyR_int2   | CAGGGACCAAGGGATAGACA            |
| mCk_ext    | GCACCTCCAGATGTAACTG             |
| mCk_int    | GATGGTGGGAAGATGGATAC            |
| Vk1_ext    | TGATGACCCARACTCCACT             |
| Vk2_ext    | GCTTGTGCTCTGGATCCC              |
| Vk3_ext    | CTGCTGCTCTGGGTTC                |
| Vk4_ext    | CAGCTTCCTGCTAATCAGTG            |
| Vk5_ext    | CTCAGATCCTTGGACTTHTG            |
| Vk6_ext    | TGGAGTCACAGACYCAGG              |
| Vk7_ext    | TGGAGTTTCAGACCCAGG              |
| Vk8_ext    | CTGCTMTGGGTATCTGGT              |
| Vk9_ext    | CWTCTTGTGCTCTGGTTTC             |
| Vk10_ext   | GATGTCCTCTGCTCAGTTC             |
| Vk11_ext   | CCTGCTGAGTTCCTTGGG              |
| Vk12_ext   | CTGCTGCTGTGGCTTACA              |
| Vk13_ext   | CCTTCTCAACTTCTGCTCT             |
| Vk14_ext   | AGGGCCCYTGCTCAGTTT              |
| Vk15_ext   | ATGAGGGTCCTTGCTGAG              |
| Vk16_ext   | GAGGTTCAGGTTTCAGGT              |
| Vk17_ext   | CCATGACCATGYTCTCACT             |
| Vk18_ext   | ATGGAACTCCAGCTTCATTT            |
| Vk19_ext   | ATGAGACCGTCTATTCAGTT            |
| Vk1_int    | CCTGTCAGTCTTGGAGATCA            |
| Vk1_2_int  | TTTGTGCGTTACCATTGGACAA          |
| Vk2_int    | SRGATATTGTGATGACGCAGG           |
| Vk3_int    | ATGTGCTGACCCAATCTCC             |
| Vk4_int    | AWTGTKCTCACCCAGTCTCC            |
| Vk5_int    | GTCTCCAGCCACCCTGTC              |
| Vk6_int    | TGATGACCCAGTCTCMCAAAT           |
| Vk7_int    | GCCTGTGCAGACATGTGAT             |
| Vk8_int    | CCTGTGGGGACATTGTGATG            |
| Vk9_int    | ACATCCRGATGACYCAGTCT            |
| Vk10_int   | CCAGATGTGATATCCAGATG            |
| Vk11_int   | GCCAGATGTGATGTYCAAATG           |
| Vk12_int   | ATCCAGATGACTCAGTCTCC            |
| Vk13_int   | CCTGATATGTGACATCCRVAT           |
| Vk14_int   | MAGATGACCCAGTCTCCATC            |
| Vk15_int   | TGAGATGTGACATCCAGATGA           |
| Vk16_int   | CCAGTGTGATGTCCAGATAAC           |
| Vk17_int   | ACAACCTGTGACCCAGTCTCC           |
| Vk18_int   | ACACAGGCTCCAGCTTCTCT            |
| Vk19_int   | GTGCTCAGTGTGACATCCAG            |

**Table S3** (related to **STAR Methods**). **Murine B cell receptor sequencing primers**. Primers originally published in Rohatgi et al., 2008 or Tiller et al., 2009 used for murine B cell receptor sequencing.



| <b><u>B Cell Receptor Sequence</u></b> | <b><u>Accession Number</u></b> |
|----------------------------------------|--------------------------------|
| VH_1_A2 variable heavy chain           | OM728968                       |
| VH_1_A4 variable heavy chain           | OM728969                       |
| VH_1_A6 variable heavy chain           | OM728970                       |
| VH_1_A7 variable heavy chain           | OM728971                       |
| VH_1_A8 variable heavy chain           | OM728972                       |
| VH_1_A10 variable heavy chain          | OM728973                       |
| VH_1_A11 variable heavy chain          | OM728974                       |
| VH_1_B4 variable heavy chain           | OM728975                       |
| VH_1_B6 variable heavy chain           | OM728976                       |
| VH_1_B8 variable heavy chain           | OM728977                       |
| VH_1_B9 variable heavy chain           | OM728978                       |
| VH_1_B12 variable heavy chain          | OM728979                       |
| VH_1_C1 variable heavy chain           | OM728980                       |
| VH_1_C2 variable heavy chain           | OM728981                       |
| VH_1_C3 variable heavy chain           | OM728982                       |
| VH_1_C4 variable heavy chain           | OM728983                       |
| VH_1_C5 variable heavy chain           | OM728984                       |
| VH_1_C7 variable heavy chain           | OM728985                       |
| VH_1_C9 variable heavy chain           | OM728986                       |
| VH_1_C12 variable heavy chain          | OM728987                       |
| VH_1_D5 variable heavy chain           | OM728988                       |
| VH_1_D6 variable heavy chain           | OM728989                       |
| VH_1_D7 variable heavy chain           | OM728990                       |
| VH_1_D10 variable heavy chain          | OM728991                       |
| VH_1_D11 variable heavy chain          | OM728992                       |
| VH_1_D12 variable heavy chain          | OM728993                       |
| VH_2_A1 variable heavy chain           | OM728994                       |
| VH_2_A2 variable heavy chain           | OM728995                       |
| VH_2_A5 variable heavy chain           | OM728996                       |
| VH_2_A8 variable heavy chain           | OM728997                       |
| VH_2_B1 variable heavy chain           | OM728998                       |
| VH_2_B4 variable heavy chain           | OM728999                       |
| VH_2_B5 variable heavy chain           | OM729000                       |
| VH_2_B7 variable heavy chain           | OM729001                       |
| VH_2_B8 variable heavy chain           | OM729002                       |
| VH_2_C2 variable heavy chain           | OM729003                       |
| VH_2_C3 variable heavy chain           | OM729004                       |
| VH_2_C4 variable heavy chain           | OM729005                       |
| VH_2_C6 variable heavy chain           | OM729006                       |
| VH_2_C8 variable heavy chain           | OM729007                       |
| VH_2_C9 variable heavy chain           | OM729008                       |
| VH_2_C10 variable heavy chain          | OM729009                       |
| VH_2_C11 variable heavy chain          | OM729010                       |
| VH_2_D1 variable heavy chain           | OM729011                       |
| VH_2_D2 variable heavy chain           | OM729012                       |
| VH_2_D4 variable heavy chain           | OM729013                       |
| VH_2_D5 variable heavy chain           | OM729014                       |
| VH_2_D6 variable heavy chain           | OM729015                       |

|                               |          |
|-------------------------------|----------|
| VH_2_D8 variable heavy chain  | OM729016 |
| VH_2_D9 variable heavy chain  | OM729017 |
| VH_2_D10 variable heavy chain | OM729018 |
| VH_2_D11 variable heavy chain | OM729019 |
| VH_2_E2 variable heavy chain  | OM729020 |
| VH_2_E3 variable heavy chain  | OM729021 |
| VH_2_E4 variable heavy chain  | OM729022 |
| VH_2_E5 variable heavy chain  | OM729023 |
| VH_2_E6 variable heavy chain  | OM729024 |
| VH_2_E7 variable heavy chain  | OM729025 |
| VH_2_E8 variable heavy chain  | OM729026 |
| VH_2_E9 variable heavy chain  | OM729027 |
| VH_2_E12 variable heavy chain | OM729028 |
| VH_2_F2 variable heavy chain  | OM729029 |
| VH_2_F3 variable heavy chain  | OM729030 |
| VH_2_F4 variable heavy chain  | OM729031 |
| VH_2_F5 variable heavy chain  | OM729032 |
| VH_2_F6 variable heavy chain  | OM729033 |
| VH_2_F7 variable heavy chain  | OM729034 |
| VH_2_F8 variable heavy chain  | OM729035 |
| VH_2_F10 variable heavy chain | OM729036 |
| VH_2_F11 variable heavy chain | OM729037 |
| VH_2_F12 variable heavy chain | OM729038 |
| VH_2_G2 variable heavy chain  | OM729039 |
| VH_2_G3 variable heavy chain  | OM729040 |
| VH_2_G4 variable heavy chain  | OM729041 |
| VH_2_G5 variable heavy chain  | OM729042 |
| VH_2_G6 variable heavy chain  | OM729043 |
| VH_2_G7 variable heavy chain  | OM729044 |
| VH_2_G8 variable heavy chain  | OM729045 |
| VH_2_G9 variable heavy chain  | OM729046 |
| VH_2_G10 variable heavy chain | OM729047 |
| VH_2_G11 variable heavy chain | OM729048 |
| VH_2_H5 variable heavy chain  | OM729049 |
| VH_2_H7 variable heavy chain  | OM729050 |
| VH_2_H8 variable heavy chain  | OM729051 |
| VH_2_H9 variable heavy chain  | OM729052 |
| VH_4_A2 variable heavy chain  | OM729053 |
| VH_4_A3 variable heavy chain  | OM729054 |
| VH_4_A4 variable heavy chain  | OM729055 |
| VH_4_A5 variable heavy chain  | OM729056 |
| VH_4_A7 variable heavy chain  | OM729057 |
| VH_4_A8 variable heavy chain  | OM729058 |
| VH_4_A10 variable heavy chain | OM729059 |
| VH_4_B1 variable heavy chain  | OM729060 |
| VH_4_B2 variable heavy chain  | OM729061 |
| VH_4_B3 variable heavy chain  | OM729062 |
| VH_4_B4 variable heavy chain  | OM729063 |
| VH_4_B5 variable heavy chain  | OM729064 |

|                               |          |
|-------------------------------|----------|
| VH_4_B6 variable heavy chain  | OM729065 |
| VH_4_B8 variable heavy chain  | OM729066 |
| VH_4_C2 variable heavy chain  | OM729067 |
| VH_4_C3 variable heavy chain  | OM729068 |
| VH_4_C6 variable heavy chain  | OM729069 |
| VH_4_C8 variable heavy chain  | OM729070 |
| VH_4_C9 variable heavy chain  | OM729071 |
| VH_4_C10 variable heavy chain | OM729072 |
| VH_4_C11 variable heavy chain | OM729073 |
| VH_4_C12 variable heavy chain | OM729074 |
| VH_4_D2 variable heavy chain  | OM729075 |
| VH_4_D3 variable heavy chain  | OM729076 |
| VH_4_D4 variable heavy chain  | OM729077 |
| VH_4_D5 variable heavy chain  | OM729078 |
| VH_4_D6 variable heavy chain  | OM729079 |
| VH_4_D7 variable heavy chain  | OM729080 |
| VH_4_D9 variable heavy chain  | OM729081 |
| VH_4_D10 variable heavy chain | OM729082 |
| VH_5_A2 variable heavy chain  | OM729083 |
| VH_5_A3 variable heavy chain  | OM729084 |
| VH_5_A6 variable heavy chain  | OM729085 |
| VH_5_A10 variable heavy chain | OM729086 |
| VH_5_A12 variable heavy chain | OM729087 |
| VH_5_B1 variable heavy chain  | OM729088 |
| VH_5_B3 variable heavy chain  | OM729089 |
| VH_5_B4 variable heavy chain  | OM729090 |
| VH_5_B5 variable heavy chain  | OM729091 |
| VH_5_B8 variable heavy chain  | OM729092 |
| VH_5_B9 variable heavy chain  | OM729093 |
| VH_5_B12 variable heavy chain | OM729094 |
| VH_5_C1 variable heavy chain  | OM729095 |
| VH_5_C2 variable heavy chain  | OM729096 |
| VH_5_C3 variable heavy chain  | OM729097 |
| VH_5_C4 variable heavy chain  | OM729098 |
| VH_5_C6 variable heavy chain  | OM729099 |
| VH_5_C8 variable heavy chain  | OM729100 |
| VH_5_C9 variable heavy chain  | OM729101 |
| VH_5_C11 variable heavy chain | OM729102 |
| VH_5_D1 variable heavy chain  | OM729103 |
| VH_5_D3 variable heavy chain  | OM729104 |
| VH_5_D4 variable heavy chain  | OM729105 |
| VH_5_D6 variable heavy chain  | OM729106 |
| VH_5_D7 variable heavy chain  | OM729107 |
| VH_5_D8 variable heavy chain  | OM729108 |
| VH_5_D9 variable heavy chain  | OM729109 |
| VH_5_D11 variable heavy chain | OM729110 |
| VH_5_D12 variable heavy chain | OM729111 |
| VH_5_E1 variable heavy chain  | OM729112 |
| VH_5_E3 variable heavy chain  | OM729113 |

|                               |          |
|-------------------------------|----------|
| VH_5_E5 variable heavy chain  | OM729114 |
| VH_5_E6 variable heavy chain  | OM729115 |
| VH_5_E7 variable heavy chain  | OM729116 |
| VH_5_E9 variable heavy chain  | OM729117 |
| VH_5_E10 variable heavy chain | OM729118 |
| VH_5_E11 variable heavy chain | OM729119 |
| VH_5_E12 variable heavy chain | OM729120 |
| VH_5_F1 variable heavy chain  | OM729121 |
| VH_5_F2 variable heavy chain  | OM729122 |
| VH_5_F3 variable heavy chain  | OM729123 |
| VH_5_F5 variable heavy chain  | OM729124 |
| VH_5_F6 variable heavy chain  | OM729125 |
| VH_5_F8 variable heavy chain  | OM729126 |
| VH_5_F10 variable heavy chain | OM729127 |
| VH_5_F12 variable heavy chain | OM729128 |
| VH_5_G1 variable heavy chain  | OM729129 |
| VH_5_G2 variable heavy chain  | OM729130 |
| VH_5_G3 variable heavy chain  | OM729131 |
| VH_5_G4 variable heavy chain  | OM729132 |
| VH_5_G5 variable heavy chain  | OM729133 |
| VH_5_G6 variable heavy chain  | OM729134 |
| VH_5_G7 variable heavy chain  | OM729135 |
| VH_5_G9 variable heavy chain  | OM729136 |
| VH_5_G10 variable heavy chain | OM729137 |
| VH_5_G12 variable heavy chain | OM729138 |
| VH_5_H1 variable heavy chain  | OM729139 |
| VH_5_H4 variable heavy chain  | OM729140 |
| VH_5_H6 variable heavy chain  | OM729141 |
| VH_5_H8 variable heavy chain  | OM729142 |
| VH_5_H11 variable heavy chain | OM729143 |
| VL_1_A2 variable light chain  | OM729144 |
| VL_1_A4 variable light chain  | OM729145 |
| VL_1_A6 variable light chain  | OM729146 |
| VL_1_A7 variable light chain  | OM729147 |
| VL_1_A8 variable light chain  | OM729148 |
| VL_1_A10 variable light chain | OM729149 |
| VL_1_A11 variable light chain | OM729150 |
| VL_1_B4 variable light chain  | OM729151 |
| VL_1_B6 variable light chain  | OM729152 |
| VL_1_B8 variable light chain  | OM729153 |
| VL_1_B9 variable light chain  | OM729154 |
| VL_1_B12 variable light chain | OM729155 |
| VL_1_C1 variable light chain  | OM729156 |
| VL_1_C2 variable light chain  | OM729157 |
| VL_1_C3 variable light chain  | OM729158 |
| VL_1_C4 variable light chain  | OM729159 |
| VL_1_C5 variable light chain  | OM729160 |
| VL_1_C7 variable light chain  | OM729161 |
| VL_1_C9 variable light chain  | OM729162 |

|                               |          |
|-------------------------------|----------|
| VL_1_C12 variable light chain | OM729163 |
| VL_1_D5 variable light chain  | OM729164 |
| VL_1_D6 variable light chain  | OM729165 |
| VL_1_D7 variable light chain  | OM729166 |
| VL_1_D10 variable light chain | OM729167 |
| VL_1_D11 variable light chain | OM729168 |
| VL_1_D12 variable light chain | OM729169 |
| VL_2_A1 variable light chain  | OM729170 |
| VL_2_A2 variable light chain  | OM729171 |
| VL_2_A5 variable light chain  | OM729172 |
| VL_2_A8 variable light chain  | OM729173 |
| VL_2_B1 variable light chain  | OM729174 |
| VL_2_B4 variable light chain  | OM729175 |
| VL_2_B5 variable light chain  | OM729176 |
| VL_2_B7 variable light chain  | OM729177 |
| VL_2_B8 variable light chain  | OM729178 |
| VL_2_C2 variable light chain  | OM729179 |
| VL_2_C3 variable light chain  | OM729180 |
| VL_2_C4 variable light chain  | OM729181 |
| VL_2_C6 variable light chain  | OM729182 |
| VL_2_C8 variable light chain  | OM729183 |
| VL_2_C9 variable light chain  | OM729184 |
| VL_2_C10 variable light chain | OM729185 |
| VL_2_C11 variable light chain | OM729186 |
| VL_2_D1 variable light chain  | OM729187 |
| VL_2_D2 variable light chain  | OM729188 |
| VL_2_D4 variable light chain  | OM729189 |
| VL_2_D5 variable light chain  | OM729190 |
| VL_2_D6 variable light chain  | OM729191 |
| VL_2_D8 variable light chain  | OM729192 |
| VL_2_D9 variable light chain  | OM729193 |
| VL_2_D10 variable light chain | OM729194 |
| VL_2_D11 variable light chain | OM729195 |
| VL_2_E2 variable light chain  | OM729196 |
| VL_2_E3 variable light chain  | OM729197 |
| VL_2_E4 variable light chain  | OM729198 |
| VL_2_E5 variable light chain  | OM729199 |
| VL_2_E6 variable light chain  | OM729200 |
| VL_2_E7 variable light chain  | OM729201 |
| VL_2_E8 variable light chain  | OM729202 |
| VL_2_E9 variable light chain  | OM729203 |
| VL_2_E12 variable light chain | OM729204 |
| VL_2_F2 variable light chain  | OM729205 |
| VL_2_F3 variable light chain  | OM729206 |
| VL_2_F4 variable light chain  | OM729207 |
| VL_2_F5 variable light chain  | OM729208 |
| VL_2_F6 variable light chain  | OM729209 |
| VL_2_F7 variable light chain  | OM729210 |
| VL_2_F8 variable light chain  | OM729211 |

|                               |          |
|-------------------------------|----------|
| VL_2_F10 variable light chain | OM729212 |
| VL_2_F11 variable light chain | OM729213 |
| VL_2_F12 variable light chain | OM729214 |
| VL_2_G2 variable light chain  | OM729215 |
| VL_2_G3 variable light chain  | OM729216 |
| VL_2_G4 variable light chain  | OM729217 |
| VL_2_G5 variable light chain  | OM729218 |
| VL_2_G6 variable light chain  | OM729219 |
| VL_2_G7 variable light chain  | OM729220 |
| VL_2_G8 variable light chain  | OM729221 |
| VL_2_G9 variable light chain  | OM729222 |
| VL_2_G10 variable light chain | OM729223 |
| VL_2_G11 variable light chain | OM729224 |
| VL_2_H5 variable light chain  | OM729225 |
| VL_2_H7 variable light chain  | OM729226 |
| VL_2_H8 variable light chain  | OM729227 |
| VL_2_H9 variable light chain  | OM729228 |
| VL_4_A2 variable light chain  | OM729229 |
| VL_4_A3 variable light chain  | OM729230 |
| VL_4_A4 variable light chain  | OM729231 |
| VL_4_A5 variable light chain  | OM729232 |
| VL_4_A7 variable light chain  | OM729233 |
| VL_4_A8 variable light chain  | OM729234 |
| VL_4_A10 variable light chain | OM729235 |
| VL_4_B1 variable light chain  | OM729236 |
| VL_4_B2 variable light chain  | OM729237 |
| VL_4_B3 variable light chain  | OM729238 |
| VL_4_B4 variable light chain  | OM729239 |
| VL_4_B5 variable light chain  | OM729240 |
| VL_4_B6 variable light chain  | OM729241 |
| VL_4_B8 variable light chain  | OM729242 |
| VL_4_C2 variable light chain  | OM729243 |
| VL_4_C3 variable light chain  | OM729244 |
| VL_4_C6 variable light chain  | OM729245 |
| VL_4_C8 variable light chain  | OM729246 |
| VL_4_C9 variable light chain  | OM729247 |
| VL_4_C10 variable light chain | OM729248 |
| VL_4_C11 variable light chain | OM729249 |
| VL_4_C12 variable light chain | OM729250 |
| VL_4_D2 variable light chain  | OM729251 |
| VL_4_D3 variable light chain  | OM729252 |
| VL_4_D4 variable light chain  | OM729253 |
| VL_4_D5 variable light chain  | OM729254 |
| VL_4_D6 variable light chain  | OM729255 |
| VL_4_D7 variable light chain  | OM729256 |
| VL_4_D9 variable light chain  | OM729257 |
| VL_4_D10 variable light chain | OM729258 |
| VL_5_A2 variable light chain  | OM729259 |
| VL_5_A3 variable light chain  | OM729260 |

|                               |          |
|-------------------------------|----------|
| VL_5_A6 variable light chain  | OM729261 |
| VL_5_A10 variable light chain | OM729262 |
| VL_5_A12 variable light chain | OM729263 |
| VL_5_B1 variable light chain  | OM729264 |
| VL_5_B3 variable light chain  | OM729265 |
| VL_5_B4 variable light chain  | OM729266 |
| VL_5_B5 variable light chain  | OM729267 |
| VL_5_B8 variable light chain  | OM729268 |
| VL_5_B9 variable light chain  | OM729269 |
| VL_5_B12 variable light chain | OM729270 |
| VL_5_C1 variable light chain  | OM729271 |
| VL_5_C2 variable light chain  | OM729272 |
| VL_5_C3 variable light chain  | OM729273 |
| VL_5_C4 variable light chain  | OM729274 |
| VL_5_C6 variable light chain  | OM729275 |
| VL_5_C8 variable light chain  | OM729276 |
| VL_5_C9 variable light chain  | OM729277 |
| VL_5_C11 variable light chain | OM729278 |
| VL_5_D1 variable light chain  | OM729279 |
| VL_5_D3 variable light chain  | OM729280 |
| VL_5_D4 variable light chain  | OM729281 |
| VL_5_D6 variable light chain  | OM729282 |
| VL_5_D7 variable light chain  | OM729283 |
| VL_5_D8 variable light chain  | OM729284 |
| VL_5_D9 variable light chain  | OM729285 |
| VL_5_D11 variable light chain | OM729286 |
| VL_5_D12 variable light chain | OM729287 |
| VL_5_E1 variable light chain  | OM729288 |
| VL_5_E3 variable light chain  | OM729289 |
| VL_5_E5 variable light chain  | OM729290 |
| VL_5_E6 variable light chain  | OM729291 |
| VL_5_E7 variable light chain  | OM729292 |
| VL_5_E9 variable light chain  | OM729293 |
| VL_5_E10 variable light chain | OM729294 |
| VL_5_E11 variable light chain | OM729295 |
| VL_5_E12 variable light chain | OM729296 |
| VL_5_F1 variable light chain  | OM729297 |
| VL_5_F2 variable light chain  | OM729298 |
| VL_5_F3 variable light chain  | OM729299 |
| VL_5_F5 variable light chain  | OM729300 |
| VL_5_F6 variable light chain  | OM729301 |
| VL_5_F8 variable light chain  | OM729302 |
| VL_5_F10 variable light chain | OM729303 |
| VL_5_F12 variable light chain | OM729304 |
| VL_5_G1 variable light chain  | OM729305 |
| VL_5_G2 variable light chain  | OM729306 |
| VL_5_G3 variable light chain  | OM729307 |
| VL_5_G4 variable light chain  | OM729308 |
| VL_5_G5 variable light chain  | OM729309 |

|                               |          |
|-------------------------------|----------|
| VL_5_G6 variable light chain  | OM729310 |
| VL_5_G7 variable light chain  | OM729311 |
| VL_5_G9 variable light chain  | OM729312 |
| VL_5_G10 variable light chain | OM729313 |
| VL_5_G12 variable light chain | OM729314 |
| VL_5_H1 variable light chain  | OM729315 |
| VL_5_H4 variable light chain  | OM729316 |
| VL_5_H6 variable light chain  | OM729317 |
| VL_5_H8 variable light chain  | OM729318 |
| VL_5_H11 variable light chain | OM729319 |

**Table S4** (related to **STAR Methods**). **Murine B cell receptor sequence accession numbers.**  
Genbank accession numbers for B cell receptor sequences.
